1 **A thermodynamic chemical reaction network drove autocatalytic prebiotic**  
2 **peptides formation**

3 Peng Bao <sup>1, 2, 3\*</sup>, Yu-Qin He <sup>1, 2, 3</sup>, Guo-Xiang Li <sup>4</sup>, Hui-En Zhang <sup>5</sup>, Ke-Qing Xiao <sup>6</sup>

4

5 <sup>1</sup> Key Lab of Urban Environment and Health, Institute of Urban Environment, Chinese

6 Academy of Sciences, Xiamen 361021, P. R. China

7 <sup>2</sup> Ningbo Urban Environment Observation and Station, Chinese Academy of Sciences,

8 Ningbo 315800, P. R. China

9 <sup>3</sup> University of Chinese Academy of Sciences, Beijing 100049, P. R. China

10 <sup>4</sup> Center for Applied Geosciences (ZAG), Eberhard Karls University Tuebingen,

11 Sigwartstrasse 10, Tuebingen 72076, Germany

12 <sup>5</sup> College of Biological and Environmental Sciences, Zhejiang Wanli University,

13 Ningbo 315100, P. R. China

14 <sup>6</sup> School of Earth and Environment, University of Leeds, Leeds LS2 9JT, UK

15 **\*Corresponding Author**

16 Institute of Urban Environment, Chinese Academy of Sciences, Xiamen 361021, P. R.

17 China; E-mail: [pbao@iue.ac.cn](mailto:pbao@iue.ac.cn)

18

19 **SUMMARY**

20       The chemical reaction networks (CRNs), which led to the transition on early  
21 Earth from geochemistry to biochemistry remain unknown. We show that under mild  
22 hydrothermal circumstances, a thermodynamic chemical reaction network including  
23 sulfite/sulfate coupled with anaerobic ammonium oxidation (Sammox), might have  
24 driven prebiotic peptides synthesis. Peptides comprise 14 proteinogenic amino acids,  
25 endowed Sammox-driven CRNs with autocatalysis. The peptides exhibit both forward  
26 and reverse catalysis, with the opposite catalytic impact in sulfite- and sulfate-fueled  
27 Sammox-driven CRNs, respectively, at both a variable temperature range and a fixed  
28 temperature, resulting in seesaw-like catalytic properties. The ratio of sulfite to sulfate  
29 switches the catalytic orientation of peptides, resulting in Sammox-driven CRNs that  
30 has both anabolic and catabolic reactions at all times. Furthermore, peptides produced  
31 from sulfite-fueled Sammox-driven CRNs could catalyze both sulfite-fueled Sammox  
32 and Anammox (nitrite reduction coupled with anaerobic ammonium oxidation)  
33 reactions. We propose that Sammox-driven CRNs were critical in the creation of life  
34 and that Anammox microorganisms that have both Sammox functions are direct  
35 descendants of Sammox-driven CRNs.

36

37

## 38 INTRODUCTION

39 The chemistry of life can be thought of as autocatalytic organized chemical  
40 reaction networks (CRNs), which involve coupling transformation of six key  
41 elements—carbon (C), hydrogen (H), oxygen (O), nitrogen (N), sulfur (S), and  
42 phosphorous (P) (Kauffman 1986; Falkowski et al., 2008; Hordijk et al., 2018). We  
43 speculate that there might have been a thermodynamic chemical reaction network,  
44 which involved C, H, O, N, and S, initiated by exergonic redox reactions, resulting in  
45 the development of the proto-metabolic networks (PMNs) in primordial  
46 phosphorus-deficient circumstances. The importance of N and S geochemical  
47 transformations in the origin of life has been majorly overlooked. A recent study has  
48 demonstrated the vital role of sulfur reduction and anaerobic ammonium oxidation in  
49 the origin of life (Li et al., 2020a). Phylogenetic distribution and functional grouping  
50 of sulfite reductase clusters show that a sulfite reductase, with a coupled  
51 siroheme-[Fe<sub>4</sub>-S<sub>4</sub>] cluster, was most likely present in the last universal common  
52 ancestor (LUCA) (Crane et al., 1995; Molitor et al., 1998; Dhillon et al., 2005). Nitrite  
53 reduction coupled with anaerobic ammonium oxidation (Anammox) might be an  
54 ancient metabolism because Anammox organisms could be the first nascent bacterial  
55 species (Brochier and Philippe, 2002; van Niftrik and Jetten, 2012), and might be the  
56 evolutionary kinds between the three domains of life (Reynaud and Devos, 2011).

57 Sulfite was richly produced on early Earth from volcanic and hydrothermal  
58 sulfur dioxide (Ono et al., 2003; Canfield et al., 2006; Anbar 2008; Falkowski et al.,  
59 2008; Moore et al., 2017). Most of the nitrogen species in hydrothermal fluids

60 released from the mantle of the reduced young Earth into the early oceans might have  
61 comprised mostly ammonium (Li and Keppler, 2014; Mikhail and Sverjensky, 2014).  
62 As a result, spontaneous redox reaction transfers for energy generation and organic  
63 molecule synthesis occurred when the prebiotically plausible sulfurous species and  
64 ammonium in early Earth hydrothermal environments encountered carbon dioxide.  
65 We hypothesize that thermodynamically feasible CRNs containing  $\text{HCO}_3^-$ ,  $\text{H}_2\text{O}$ ,  
66  $\text{NH}_4^+$ ,  $\text{SO}_3^{2-}/\text{SO}_4^{2-}$ , and  $\text{HS}^-$  (Scheme 1) (Balcerowiak 1985; Amend and Shock, 2001;  
67 Fdz-Polanco et al., 2001; Amend et al., 2003; Ma et al., 2009; Schrum et al., 2009;  
68 Wang et al., 2013; He et al., 2019; Li et al., 2020b; Wu et al., 2020), might produce  
69 PMNs. In this CRNs, sulfur reduction, nitrite reduction coupled with anaerobic  
70 ammonium oxidation are all included (Scheme 1; Eq 1, 2, and 3). The reducing power  
71 from the reaction (Sammox) could drive the CRNs (Li et al., 2020a).

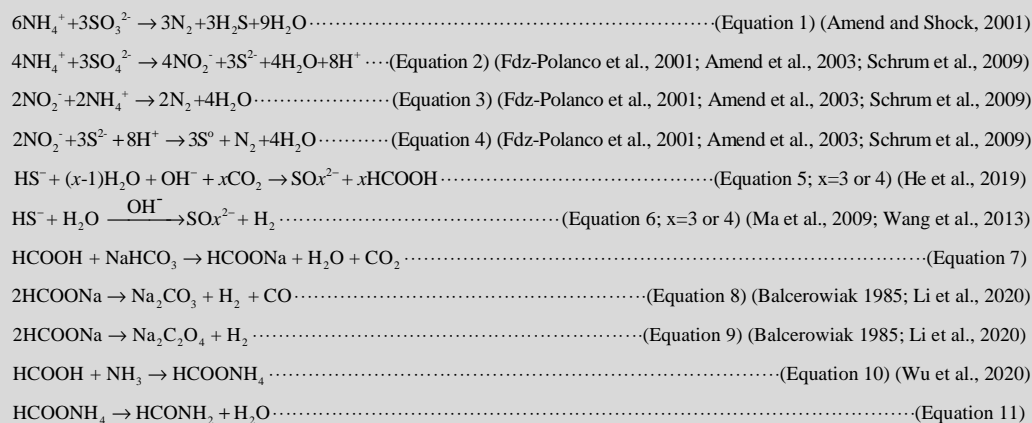

72  
73 **Scheme 1. Proposed reactions for the Sammox-driven CRNs. Sammox: equations**  
74 **1, 2, 3, 4. CO<sub>2</sub> reduction: equations 6, 7, 8, 9. N activation: equations 10, 11.**

75 The reactions in Sammox-driven CRNs are nonlinear and connected in intricate  
76 ways. As a result, we only offer the reaction equation up to the formamide, which acts

77 as a chemical precursor for the production of metabolic and genetic apparatus  
78 intermediate (Saladino et al., 2012), (Scheme 1; Eq 11). The Sammox-driven CRNs  
79 were nonequilibrium thermodynamic CRNs, which provide energy and material for  
80 the development of PMNs. Peptides are the best-known biocatalysts in the cell and the  
81 molecular hubs in the origin of life, therefore the PMNs should have at least started  
82 with carbon fixation, reductive amination, and continued until peptides production.  
83 (Frenkel-Pinter et al., 2020). As a result, prebiotic CRNs, which resulted in the origin  
84 of life should have contributed to the autocatalysis of the PMNs. In this study, we  
85 demonstrate evidence of peptides production, and the origin of autocatalysis in  
86 Sammox-driven CRNs comprising  $\text{HCO}_3^-$ ,  $\text{NH}_4^+$ ,  $\text{SO}_3^{2-}/\text{SO}_4^{2-}$  under mild  
87 hydrothermal circumstances providing a novel option of the earliest origin of life.

88

## 89 **RESULTS AND DISCUSSION**

### 90 **Sammox drives peptides formation and its possible pathway**

91 Determination of the likely end product of Sammox-driven CRNs was the  
92 primary goal of this study. We detected formate as initial product of Sammox-driven  
93 CRNs, and peptides as the end products of sulfite/sulfate-fueled CRNs (Fig. 1 a, b).  
94  $\text{H}_2\text{S}$  is an essential reductant in abiotic  $\text{CO}_2$  reduction to organics (Wang et al., 2013).  
95 The first observation of  $\text{CO}_2$  reduction to formate with  $\text{H}_2\text{S}$  in a simulated  
96 hydrothermal vent system was reported by He et al. (He et al., 2019) (Scheme 1; Eq 5,  
97 6;  $x = 3$  or 4). During this reaction, over 80%  $\text{S}^{2-}$  was oxidized to  $\text{SO}_3^{2-}$  and others to  
98  $\text{SO}_4^{2-}$  (Eq 5). The sulfur redox cycle can be obtained through  $\text{SO}_3^{2-}/\text{SO}_4^{2-}$  reduction

99 to  $S^{2-}$  by organic carbon (Wang et al., 2013; He et al., 2019). In this study, the sulfur  
100 redox cycle can be obtained through  $SO_3^{2-}/SO_4^{2-}$  reduction to  $S^{2-}$  by  $NH_4^+$ , the  
101 Sammox process (Scheme 2). In a different manner,  $NH_4^+$  could preserve the organic  
102 compounds in Sammox-driven CRNs. Water-gas shift reaction occurred in  
103 Sammox-driven CRNs, resulting in the production of active  $H_2$  and CO (Eq 7, 8, 9)  
104 (Balcerowiak 1985; Li et al., 2020b). Active  $H_2$  was employed to reduce  $CO_2$ , and  
105  $\alpha$ -keto acids production (Scheme 2). Formate may react with ammonium to produce  
106 ammonium formate (Scheme 1; Eq 10) (Wu et al., 2020). Ammonium formate may be  
107 both hydrogen and nitrogen sources for the reductive amination of  $\alpha$ -keto acids (Wu  
108 et al., 2020). Ammonium formate reacted with pyruvate to produce alanine, glycine,  
109 valine, leucine, and serine (Table 1; extended data Fig. 1). Ammonium formate  
110 reacted with oxaloacetate to produce aspartate, threonine, and a high level of alanine  
111 up to 268  $\mu$ M (Table 1; extended data Fig. 2). Ammonium formate reacted with  
112  $\alpha$ -ketoglutarate to produce proline, arginine, and a high level of glutamate up to 46  
113  $\mu$ M (Table 1; extended data Fig. 3). Ammonium formate reacted with pyruvate,  
114 oxaloacetate, and  $\alpha$ -ketoglutarate to produce alanine, glycine, valine, leucine, serine,  
115 glutamate, and aspartate. That is because heating ammonium formate turns it into  
116 formamide (Scheme 1, Eq 11), which acts as a chemical precursor for pyruvate,  
117 oxaloacetate, and  $\alpha$ -ketoglutarate production (Saladino et al., 2012). Succinate, malate,  
118 and fumarate can be generated from oxaloacetate, by a reductive dehydroxylation step  
119 to yield succinate, and a two-electron–two-proton reduction step to yield malate, a  
120  $\beta$ -elimination of  $H_2O$  to yield fumarate, whereas  $\alpha$ -ketoglutarate can be produced by

121 adding a one-carbon unit to succinate (Saladino et al., 2012). Other possible pathways,  
122 such as carboxylic acids and amino acids, which could be the products of sodium  
123 cyanide and ammonium chloride at 38°C cannot be ruled out (Ruiz-Bermejo et al.,  
124 2012). Because heating of formamide at higher temperatures and under acidic  
125 circumstances will produce hydrogen cyanide, and these conditions can be met in our  
126 experiment (Eq. 12, 13).

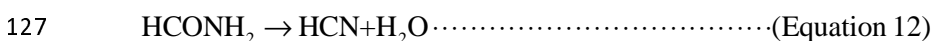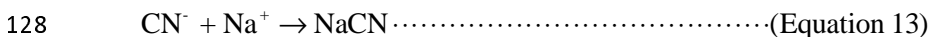

129 However, there is no peptides production in sulfide-fueled CRNs (Fig. 1c),  
130 which may require a higher reaction temperature. As sulfate would have been  
131 severely limited in the primordial environment, sulfite-fueled CRNs may be viable  
132 Sammox-driven CRNs that contribute to the production of peptides under mild  
133 primordial conditions (Canfield et al., 2006; Crowe et al., 2014; Moore et al., 2017;  
134 Colman et al., 2020). It is worth mentioning that sulfite should be accelerant during  
135 reductive amination (Wang et al., 2012). Figure 2 indicates a chromatogram of  
136 peptides generated from Sammox-driven prebiotic CRNs. Figure 2b indicates the  
137 peak of standard peptides that appeared in similar retention times of target peptides in  
138 the sample, verifying the feasibility of the standard peptides. Table 2 demonstrates  
139 selected identified peptides produced from Sammox-driven prebiotic CRNs, and  
140 Figure 3 representative MS/MS spectra of identified peptides produced from  
141 Sammox-driven prebiotic CRNs. We have not detected free amino acids in  
142 Sammox-driven CRNs (data not shown). This indicates that the Sammox-driven

143 CRNs facilitate amino acids polymerization, given that carbon disulfide (CS<sub>2</sub>) and  
144 carbonyl sulfide (COS), components of the interaction of hydrogen sulfide and carbon  
145 dioxide under mild circumstances in an anaerobic aqueous environment (Heinen and  
146 Lauwers, 1996), could promote peptide bond formation (Leman et al., 2004, 2015;  
147 Frenkel-Pinter et al., 2020).

148 We discovered that the peptides comprised 14 proteinogenic amino acids,  
149 including L-alanine, glycine, L-valine, L-histidine, L-leucine, L-serine, L-aspartate,  
150 L-asparagine, L-lysine, L-glutamate, L-tyrosine, L-threonine, L-proline, and  
151 L-arginine (Table 1; extended data Fig. 4, and 5). The 14 proteinogenic amino acids  
152 required only a few steps in their metabolism from the incomplete rTCA (Hartman  
153 1975). L-alanine, glycine, L-valine, L-leucine, and L-serine are closely linked to  
154 pyruvate. L-aspartate, L-asparagine, L-lysine, L-tyrosine and L-threonine are linked to  
155 oxaloacetate. L-glutamate, L-proline, and L-arginine are linked to  $\alpha$ -ketoglutarate.  
156 Notably, compared to other amino acids, the frequency of the most ancient amino  
157 acids—glycine, L-alanine, L-aspartate, and L-glutamate—was relatively high  
158 compared to other amino acids (Table 1), which can be explained by existing theories  
159 (Wong 2005; Trifonov et al., 2012). The frequency of L-serine was also relatively  
160 high, as it is conserved in ancestral ferredoxin (Eck and Dayhoff, 1966). More  
161 importantly, the frequency of glycine, L-alanine, L-aspartate, L-glutamate, and  
162 L-serine as conserved amino acids is in accordance with the earliest stage of genetic  
163 code evolution (Davis 2002).



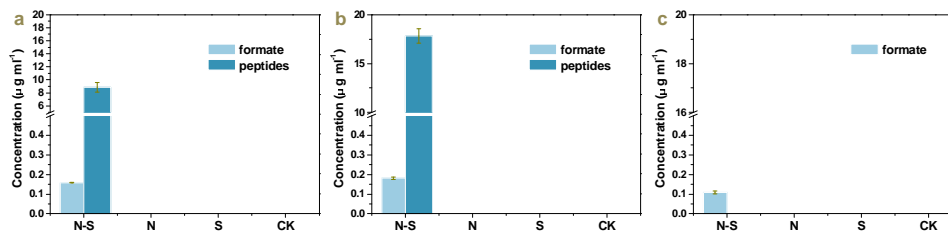

164

165 **Figure 1. Organic compounds developed from Sammox-driven prebiotic CRNs**

166 **with bicarbonate as the sole carbon source under mild hydrothermal conditions.**

167 **Treatments were as follows (a, sulfite-fueled CRNs; b, sulfate-fueled CRNs; c,**

168 **sulfide-fueled CRNs) from left to right, N-S: ammonium + sulfurous species, N:**

169 **ammonium, S: sulfurous species, CK. The bar chart indicates the output of**

170 **formate and peptides in each treatment group. Error bars represent standard**

171 **deviations of three replicates.**

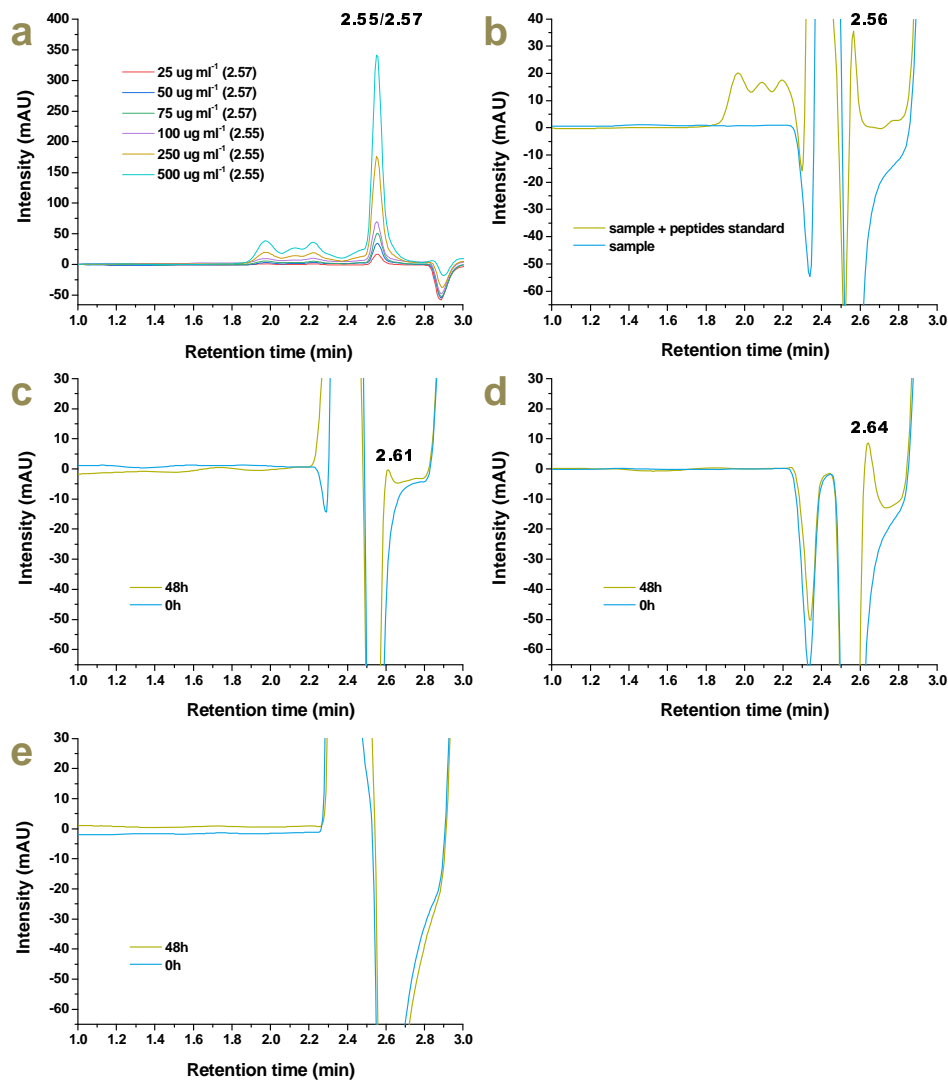

172

173 **Figure 2. Chromatogram of peptides developed from Sammox-driven CRNs,**

174 **with bicarbonate as the sole carbon source, under mild hydrothermal**

175 **circumstances. A, peptides standards (the retention time for each concentration**

176 **is demonstrated accordingly in brackets); b, a 0.4 ml of 0 h sample of**

177 **sulfite-fueled Sammox-driven CRNs added into 0.3 ml peptides standards (500**

178  **$\mu\text{g ml}^{-1}$ ); c, sulfite-fueled Sammox-driven prebiotic CRNs; d, sulfate-fueled**

179 **Sammox-driven prebiotic CRNs; e, sulfide-fueled Sammox-driven prebiotic**

180 **CRNs. The number illustrates the retention time of peptides peaks.**

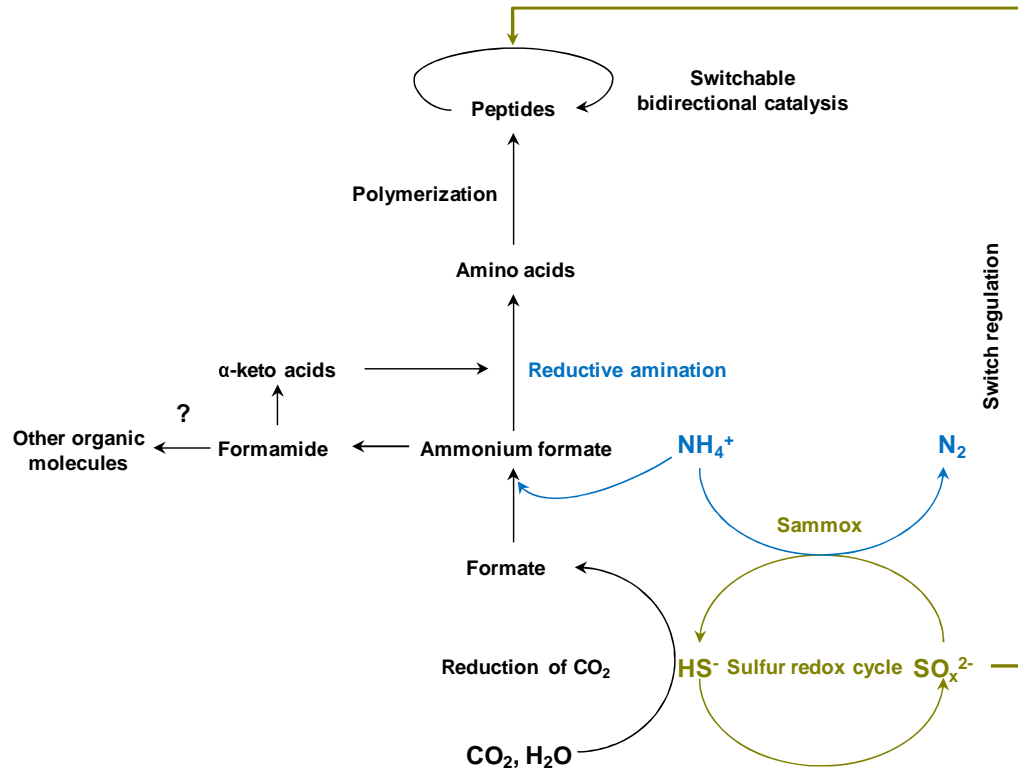

181

182 **Scheme 2 Demonstrates the conceptual model of Sammox-driven coupled**  
183 **transformation of carbon, hydrogen, oxygen, nitrogen, sulfur simultaneously in**  
184 **nonequilibrium thermodynamic environments, initiating the emergence of**  
185 **prebiotic autocatalytic CRNs. Switchable bidirectional catalysis of peptides was**  
186 **regulated by the ratio of sulfite to sulfate in Sammox-driven prebiotic CRNs.  $x =$**   
187 **3, 4.**

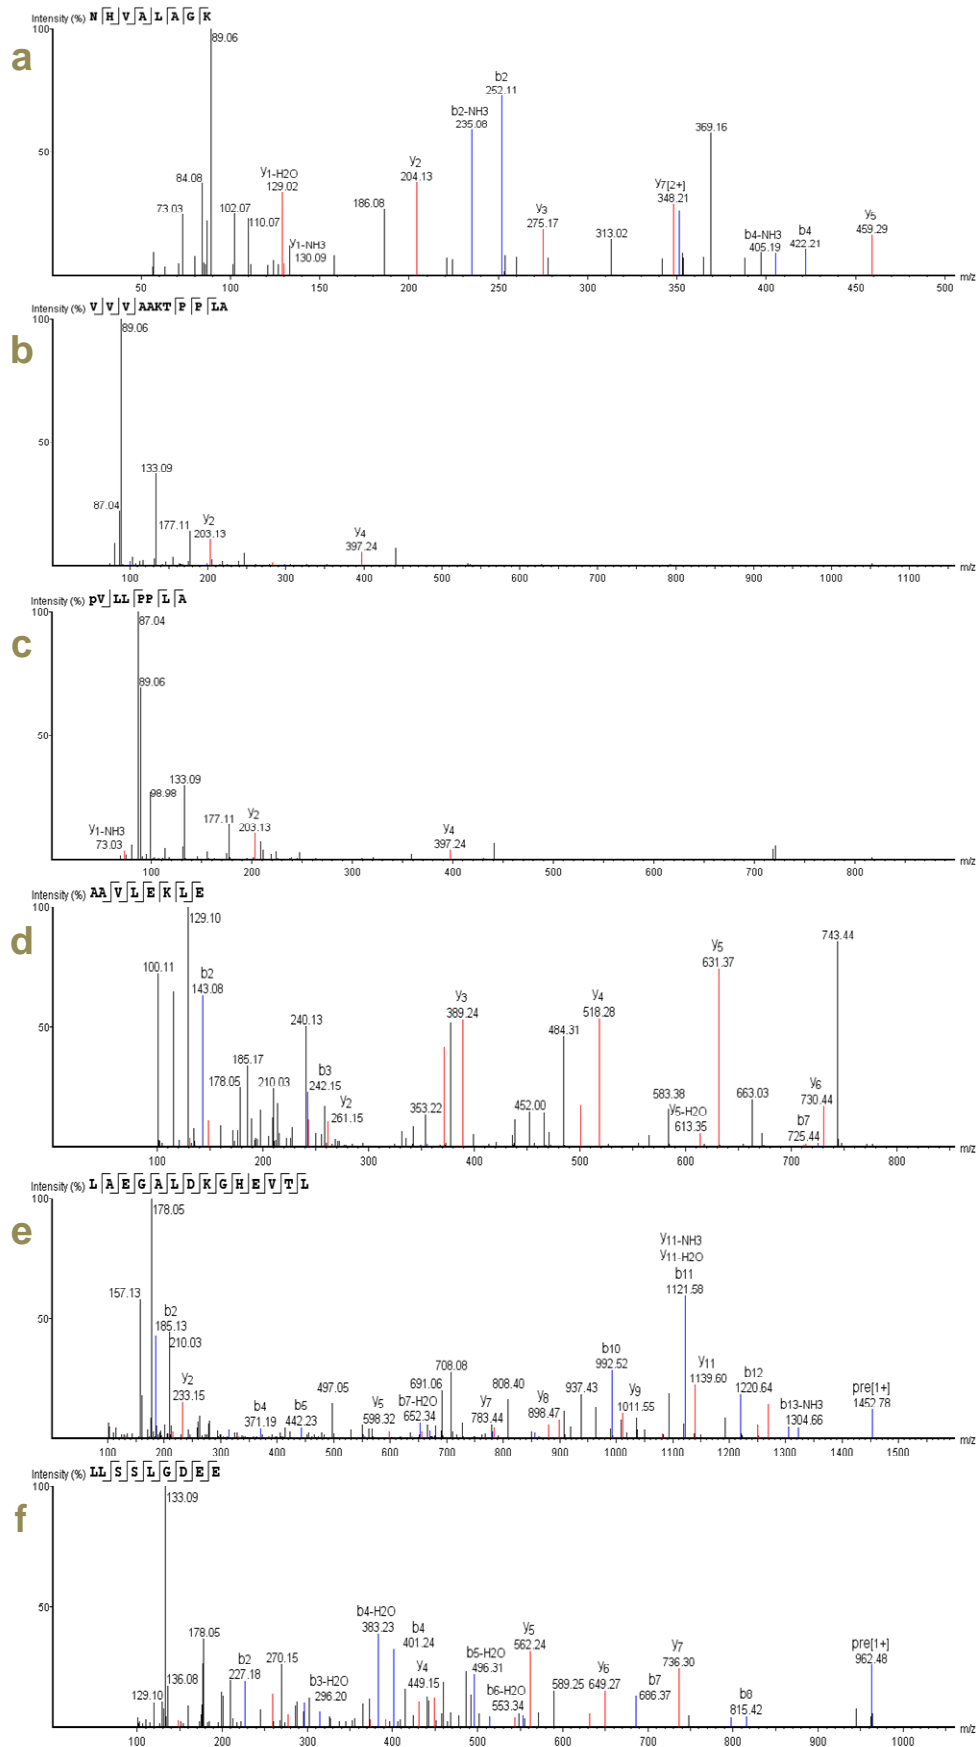

189 **Figure 3. MS/MS spectra of Sammox-driven CRNs-generated peptides. The**  
190 **spectra of selected three peptides a–c were from sulfite-fueled Sammox-driven**  
191 **CRNs. The spectra of selected three peptides d–f were from sulfate-fueled**  
192 **Sammox-driven CRNs.**

193

### 194 **The emergence of autocatalysis in Sammox-driven CRNs**

195 Primordial peptides synthesized by Sammox-driven CRNs should be  
196 multifunctional peptides with low substrate specificity; hence, they should be  
197 connected mechanistically and evolutionarily. It has been proposed that any  
198 sufficiently complex set of polypeptides will inevitably generate reflexively  
199 autocatalytic sets of peptides and polypeptides (Kauffman 1986). In 1996, Lee et al.  
200 demonstrated that a rationally designed 32-residue  $\alpha$ -helical peptide could act  
201 autocatalytically in templating its own synthesis by accelerating thioester-promoted  
202 amide-bond condensation in neutral aqueous solutions, indicating that the peptide has  
203 the possibility of self-replication (Lee et al., 1996). Other studies have proposed that  
204 not only do some dipeptides and short peptides have catalytic activities, but even a  
205 single proline can have aldolase activity (Sakthivel et al., 2001; Jarvo and Miller,  
206 2002).

207 In this study, we established series of investigations to confirm whether the  
208 Sammox-driven CRNs already autocatalysis, by using Sammox-driven CRNs  
209 products to self-catalyze Sammox-driven CRNs. A 1.0 ml Sammox reaction solution  
210 (the first round sulfite/sulfate-fueled Sammox) was injected into freshly prepared

211 Sammox reaction solution (the second round sulfite/sulfate-fueled Sammox) as the  
212 potential catalyst (Scheme 3 a and b). First, we examined the potential catalysis of  
213 products to Sammox-driven CRNs in a variable temperature range, 100°C 24 h–70°C  
214 24 h. Then, we investigated the potential catalysis of products to Sammox-driven  
215 CRNs in a selected biologically significant temperature, 45°C 48 h. Surprisingly,  
216 products that were generated from sulfite-fueled Sammox reaction could facilitate  
217 peptides generation in sulfite-fueled Sammox-driven CRNs at 100°C–70°C, and in  
218 sulfate-fueled Sammox-driven CRNs at 45°C; but inhibited peptides generation in  
219 sulfate-fueled Sammox-driven CRNs at 100°C–70°C, and in sulfite-fueled  
220 Sammox-driven CRNs at 45°C (Scheme 3 a and b; Fig. 4, 5). Products that were  
221 generated from sulfate-fueled Sammox reaction, could inhibit peptides generation in  
222 sulfite-fueled Sammox-driven CRNs at 100°C–70°C, and in sulfate-fueled  
223 Sammox-driven CRNs at 45°C; but facilitate peptides generation in sulfate-fueled  
224 Sammox-driven CRNs at 100°C–70°C, and in sulfite-fueled Sammox-driven CRNs at  
225 45°C (Scheme 3 a and b; Fig. 4, 5). As we have demonstrated that there are no free  
226 amino acids in Sammox-driven CRNs. The Sammox-driven CRNs-generated peptides  
227 are most likely to be the catalysts, which could be complex enough to facilitate the  
228 emergence of reflexive autocatalysis, making Sammox-driven CRNs autocatalytic  
229 (Scheme 2, 3 c). The peptides might have the reverse catalytic capacity that led to the  
230 inhibition phenomenon of peptides production in the corresponding treatment groups.  
231 It seemed that peptides presented bidirectional catalysis, forward and reverse catalysis,  
232 and always showed the opposite catalytic effect in sulfite- and sulfate-fueled

233 Sammox-driven CRNs, respectively, at selected high and low temperatures,  
234 presenting seesaw-like catalytic properties (Scheme 3 d). The catalytic direction of  
235 peptides was switchable owing to the ratio of sulfite to sulfate, keeping  
236 Sammox-driven CRNs with both anabolic and catabolic reactions at all times. As  
237 enzymes are intrinsically bidirectional, a newly evolved enzyme can not be assigned  
238 to either autotrophic or heterotrophic metabolism. Enzymes that were able to catalyze  
239 the synthesis of CO<sub>2</sub> to organic macromolecules were principally able to catalyze the  
240 degradation of the respective products as well (Gutekunst 2018). So far, we do not  
241 know the exact intrinsic mechanisms of seesaw-like catalytic impacts, but it is critical  
242 to maintaining the materials balance of Sammox-driven CRNs and the sustainability  
243 of Sammox-driven CRNs. This result suggests a common origin of evolutionary  
244 metabolism and catabolism since sulfite and sulfate were consistently co-occurring in  
245 the Sammox-driven CRNs through the sulfur oxidation cycle (Scheme 2).

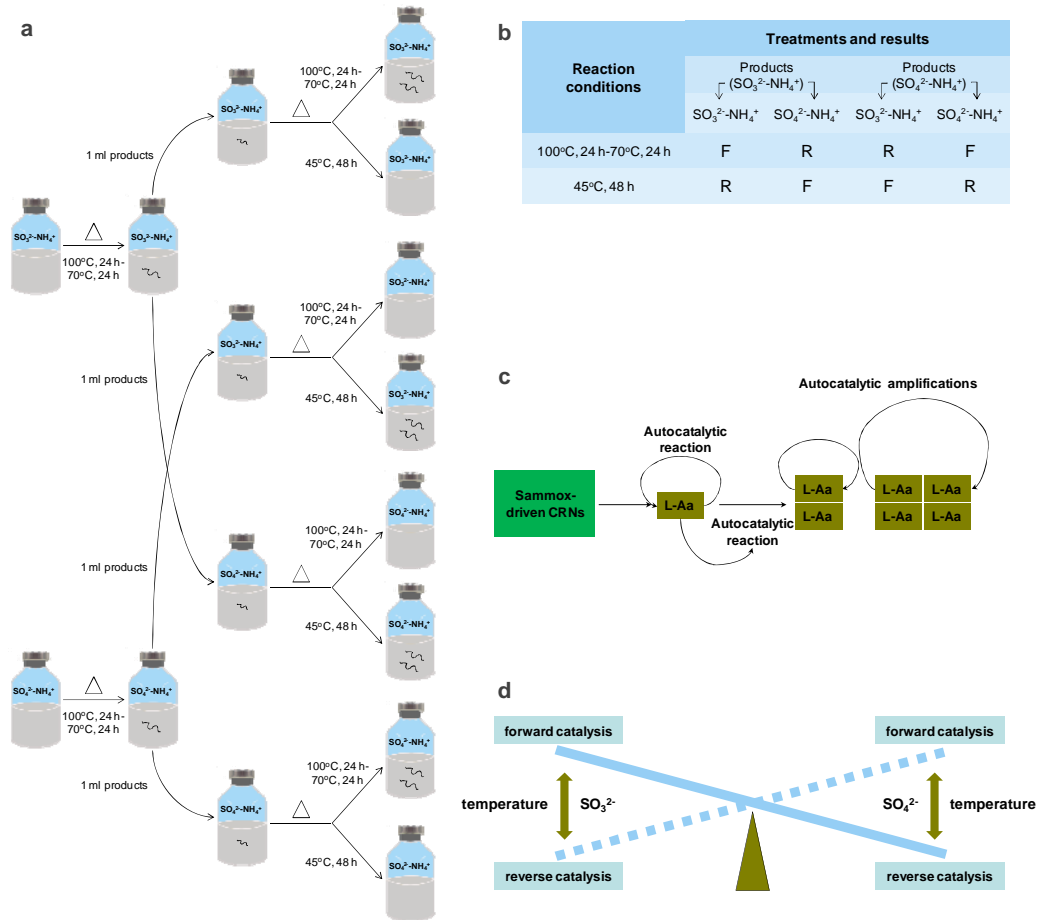

246

247 **Scheme 3. Schematic diagram of detection of autocatalysis in the Sammox-driven**

248 **CRNs. A and B, experimental procedure and results summary (F: forward**

249 **catalysis, R: reverse catalysis, : peptides). C, Seesaw-like catalytic impacts of**

250 **peptides in sulfite and sulfate-fueled Sammox-driven CRNs. D, expected**

251 **autocatalytic amplification of L-peptides in the Sammox-driven CRNs.**



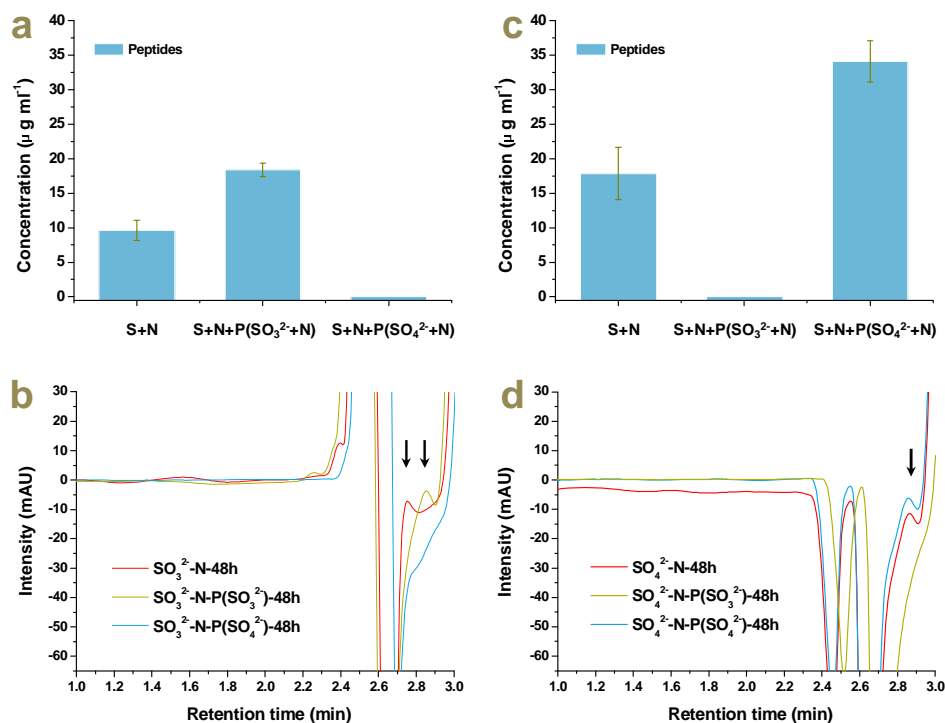

252

253 **Figure 4. Autocatalysis of the Sammox-driven CRNs under 100°C–70°C after 48**

254 **h reaction (a, peptides in sulfite-fueled CRNs; c, peptides in sulfate-fueled CRNs).**

255 **For a and c, treatments were as follows from left to right: sulfurous species with**

256 **ammonium; sulfurous species with ammonium plus 1.0 ml products from**

257 **sulfite-fueled CRNs; sulfurous species with ammonium plus 1.0 ml products**

258 **from sulfate-fueled CRNs. Chromatogram of peptides generated from**

259 **Sammox-driven CRNs (b, sulfite-fueled CRNs; d, sulfate-fueled CRNs). For b**

260 **and d, the red color line indicates the treatment group of sulfurous species with**

261 **ammonium; olive color line indicates treatment group of sulfurous species with**

262 **ammonium plus 1.0 ml products from sulfite-fueled CRNs; blue color line**

263 **indicates treatment group of sulfurous species with ammonium plus 1.0 ml**

264 **products from sulfate-fueled CRNs. The arrows demonstrate the peaks of**

265 peptides. Error bars illustrate standard deviations of three replicates ( $P < 0.05$ ).

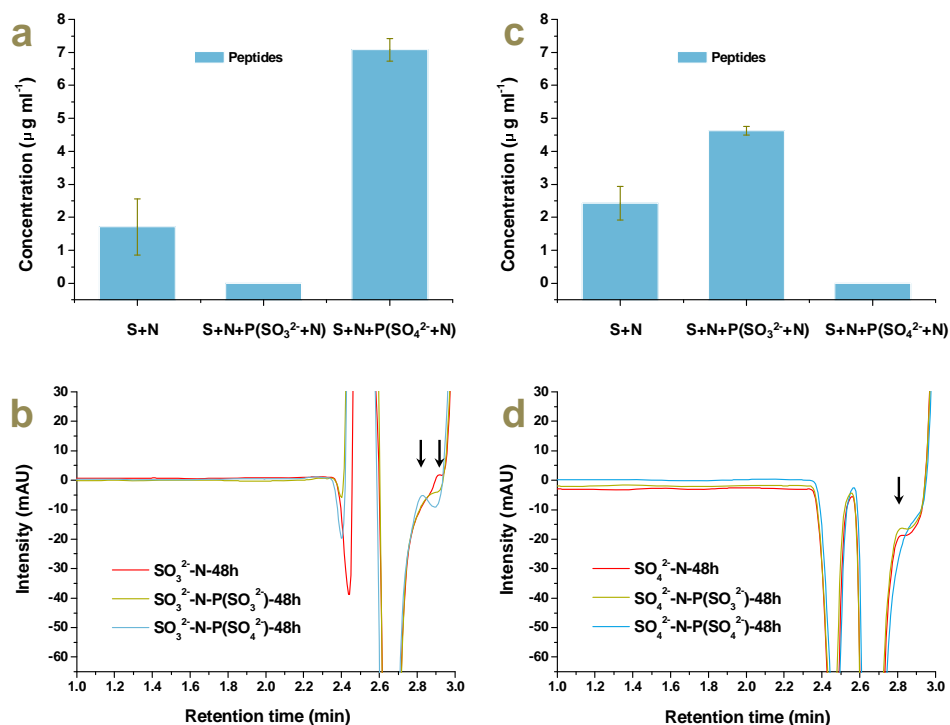

266

267 **Figure 5. Autocatalysis of the Sammox-driven CRNs under 45°C after 48 h**

268 **reaction (a, peptides in sulfite-fueled CRNs; c, peptides in sulfate-fueled CRNs).**

269 **For a and c, treatments were as follows from left to right: sulfurous species with**

270 **ammonium; sulfurous species with ammonium plus 1.0 ml products from**

271 **sulfite-fueled CRNs; sulfurous species with ammonium plus 1.0 ml products**

272 **from sulfate-fueled CRNs. Chromatogram of peptides generated from**

273 **Samnox-driven CRNs (b, sulfite-fueled CRNs; d, sulfate-fueled CRNs). For b**

274 **and d, the red color line indicates the treatment group of sulfurous species with**

275 **ammonium; olive color line indicates treatment group of sulfurous species with**

276 **ammonium plus 1.0 ml products from sulfite-fueled CRNs; blue color line**

277 **indicates treatment group of sulfurous species with ammonium plus 1.0 ml**

278 **products from sulfate-fueled CRNs. The arrows demonstrate the peaks of**  
279 **peptides. Error bars illustrate standard deviations of three replicates ( $P < 0.05$ ).**

280

### 281 **Relationship between Sammox-driven CRNs and proto-metabolisms**

282       The Sammox-driven CRNs might be PMNs of both autotrophy and heterotrophy.  
283 As a result, there may be multiple types of metabolisms stemming from the  
284 Sammox-driven CRNs. For example, Sammox, Anammox, formate/hydrogen  
285 oxidation coupled with dissimilatory sulfite reduction, dissimilatory nitrite reduction  
286 to ammonium (nitrite ammonification), or peptides/protein degradation. If  
287 Sammox-driven CRNs could have driven the emergence of LUCA, the direct  
288 descendant of LUCA should have similar energy conservation pathways as  
289 Sammox-driven CRNs. Accordingly, Planctomycetes could be the first emerging  
290 bacterial group, based on analysis of the bacterial phylogeny through rRNA sequences  
291 (Brochier and Philippe, 2002). It is also declared that Planctomycetes might be  
292 transitional forms between the three domains of life (Reynaud and Devos, 2011),  
293 implying a planctobacterial origin of Nomura (eukaryotes, archaea) (Cavalier-Smith  
294 and Chao, 2020). The planctomycete *Gemmata obscuriglobus* was the only  
295 microorganism capable of protein endocytosis and degradation, implying an  
296 intermediate stage between bacteria and eukaryotes (Lonhienne et al., 2010; Acehan et  
297 al., 2014). On the other hand, all Anammox microorganisms belong to a monophyletic  
298 group, deepest branching inside the phylum Planctomycetes (van Niftrik and Jetten,  
299 2012), and is the only microorganism with membranes comprising both ether-linked

300 lipids (found in archaeal lipids) and ester-linked lipids (found in bacterial and  
301 eukaryotic lipids), suggesting a plausible intermediate for the development of the  
302 archaeal membrane (Devos and Reynaud, 2010). Therefore, Anammox  
303 microorganisms might be the predominant primordial species in Planctomycetes.

304 A recent study demonstrated the mixotrophic feather of Anammox  
305 microorganisms *Candidatus "Kuenenia stuttgartiensis"* directly assimilates  
306 extracellular formate through the Wood–Ljungdahl pathway instead of oxidizing it  
307 completely to CO<sub>2</sub> (Christopher et al., 2021). Experimental investigation together  
308 with genomic evidence has also inferred that Anammox microorganisms can perform  
309 reverse metabolism of Anammox, which utilize alternative electron donors to  
310 ammonium, such as formate, acetate, and propionate for energy conservation with  
311 nitrite or nitrate as electron acceptors (Güven et al., 2005; Strous et al., 2006; Kartal et  
312 al., 2007; Christopher et al., 2021). The proto-metabolisms that may allow LUCA to  
313 absorb electrons from carbohydrate oxidation and provide a reductant for CO<sub>2</sub>  
314 fixation could have evolved in two connected organisms or a single cell (Gutekunst  
315 2018). A pure culture of Anammox microorganisms is yet to be discovered (Kuenen  
316 2020), implying that Anammox microorganisms may require symbiont to survive.  
317 The unique characteristics of Planctomycetes are consistent with the inferences for  
318 proto-metabolism, and Anammox microorganisms may be the direct descendant of  
319 Sammox-driven CRNs. The functional microorganisms were majorly Anammox  
320 microorganisms or Planctomycetes in sulfate-dependent ammonium oxidation  
321 environment (Liu et al., 2021), suggesting that the Sammox-driven CRNs can support

322 primordial Anammox metabolism. Indeed, nitrite reduction coupled with ammonium  
323 oxidation occurred in Sammox-driven CRNs (Scheme 1, Eq 3).

324 In this study, we proposed that the peptides generated from sulfite-fueled  
325 Sammox-driven CRNs should catalyze the key reactions, such as sulfite-fueled  
326 Sammox (Scheme 1, Eq 1) and Anammox reactions (Scheme 1, Eq 3). Dissimilatory  
327 sulfite reductase (DsrAB) is closely related to the assimilatory enzyme present in all  
328 domains of life and is an enzyme of primordial origin (Wagner et al., 1998; Grein et  
329 al., 2013). Because the functional divergence of assimilatory and dissimilatory sulfite  
330 reductases preceded the separation of the bacterial and archaeal domains (Crane et al.,  
331 1995; Molitor et al., 1998; Dhillon et al., 2005), LUCA most likely had a primordial  
332 sulfite reductase. Sulfite respiration required sulfite, formate, or hydrogen all of which  
333 were present in the Sammox-driven CRNs (Scheme 1, Figure 1), implying the feasible  
334 emergence of sulfite reductase from Sammox-driven CRNs. Sulfite reductases from  
335 some sources can catalyze the reduction of both sulfite and nitrite (Crane and Getzoff,  
336 1996), acting as nitrite reductase. As a result, the peptides generated from  
337 sulfite-fueled Sammox-driven CRNs may also catalyze Anammox reaction, as nitrite  
338 reductase (Nir) is a key enzyme in Anammox reaction (Strous et al., 2006).

339 Our results demonstrated that peptides that were generated from sulfite-fueled  
340 Sammox reaction solutions, could significantly facilitate the consumption of sulfite  
341 and ammonium in sulfite-fueled Sammox-driven CRNs ( $P < 0.05$ ) (Fig. 6 a, b). More  
342 sulfate was generated through the sulfur redox cycle (Scheme 2) in the peptides  
343 amendment group (Fig. 6 a). We also detected a trace of thiosulfate, as it was reported

344 that thiosulfate can be generated through the sulfur redox cycle (He et al., 2019).  
345 Peptides that were generated from sulfite-fueled Sammox reaction solutions could  
346 significantly facilitate the consumption of nitrite and ammonium in the Anammox  
347 reaction ( $P < 0.05$ ) (Fig. 6 c). This finding infers an intrinsic relationship between  
348 Sammox-driven CRNs and proto-metabolisms, and the common evolutionary origin  
349 of Sammox and Anammox. Anammox microorganisms may be the direct descendant  
350 of Sammox-driven CRNs. It will be critical to investigate the Sammox function of  
351 Anammox microorganisms.

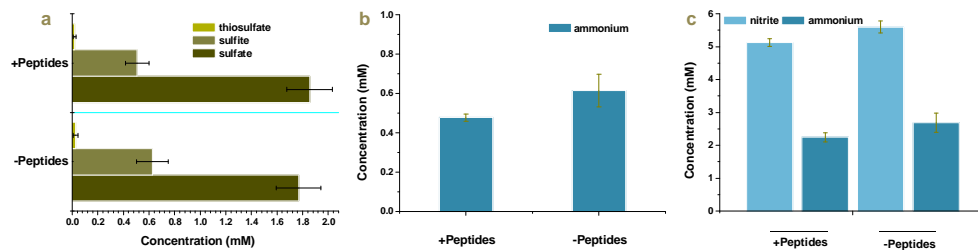

352

353 **Figure 6. Peptides that were generated from sulfite-fueled Sammox reaction**  
354 **solutions, facilitated the consumption of sulfite and ammonium in sulfite-fueled**  
355 **Sammox-driven CRNs, and nitrite and ammonium in Anammox reaction. Data**  
356 **are all obtained after 48 h of reaction. Error bars indicate standard deviations of**  
357 **three replicates ( $P < 0.05$ ).**

358

### 359 SIGNIFICANCE

360 This study reports that the simplest substances— $\text{CO}_2$ , sulfite/sulfate, and  
361 ammonium—were converted to peptides in one geological setting by Sammox-driven  
362 CRNs which consisted of  $\text{CO}_2$  fixation and reductive amination. Peptides, with 14

363 proteinogenic amino acids, provide the Sammox-driven CRNs with autocatalysis.  
364 Peptides exhibit bidirectional catalysis, with the opposite catalytic effect in sulfite and  
365 sulfate-fueled Sammox-driven CRNs, respectively, at both a variable temperature  
366 range and a fixed temperature, resulting in seesaw-like catalytic characteristics. The  
367 seesaw-like catalytic characteristics of peptides enable Sammox-driven CRNs to  
368 maintain both anabolic and catabolic reactions at all times. This result suggests a  
369 common origin of primordial metabolism and catabolism since sulfite and sulfate  
370 were co-occurring consistently in the Sammox-driven CRNs through the sulfur redox  
371 cycle. In addition, peptides generated from sulfite-fueled Sammox-driven CRNs can  
372 catalyze both sulfite-fueled Sammox and Anammox reactions, combining the unique  
373 characteristics of Anammox microorganisms with the inference of proto-metabolism,  
374 Anammox microorganisms with both Sammox functions may be the direct descendant  
375 of Sammox-driven CRNs. We infer that Sammox-driven CRNs, under mild conditions,  
376 are critical for driving the origin of life.

377

## 378 **MATERIAL AND METHODS**

### 379 **Chemicals and reagents**

380 All chemical reagents and organic solvents were of analytical grade. Detailed  
381 information is as follows: ammonium chloride (>99.5%, CAS number: 12125-02-9),  
382 ammonium formate (>97%, CAS number: 540-69-2) were acquired from  
383 Sigma-Aldrich, USA. Sodium sulfate (>99.9%, CAS number: 7757-82-6), sodium  
384 sulfide nonahydrate (>98%, CAS number: 1313-84-4), acetonitrile (>99.9%, CAS

385 number: 75-05-8), methanesulfonic acid (>99.5%, CAS number: 75-75-2) were  
386 purchased from Aladdin, USA. Sodium sulfite (>98.5%, CAS number: 7757-83-7),  
387 oxalacetic acid (>98%, CAS number: 328-42-7), 2-Ketoglutaric acid, disodium salt,  
388 dehydrate (>99%, CAS number: 305-72-6) were purchased from Acros Organics,  
389 Belgium. Pyruvic acid sodium (>98%, CAS number: 113-24-6) was purchased from  
390 Amresco, USA. Methanol (>99.9%, CAS number: 67-56-1) was obtained from Tedia,  
391 USA. Sodium acetate anhydrate (>99%, CAS number: 127-09-3) was purchased from  
392 Sangon Biotech, China. Sodium bicarbonate (>99%, CAS number: 144-55-8) was  
393 purchased from Macklin, China. Peptide digest assay standard (Pierce<sup>TM</sup> Quantitative  
394 Colorimetric Peptide Assay, Thermo Scientific, USA) was as standard for quantitative  
395 analysis of peptides. All reagents were utilized without further purification unless  
396 otherwise noted. Ultrapure water was prepared employing the Millipore purification  
397 system (Billerica, MA, USA).

398

### 399 **General procedure for Sammox reactions**

400 A total of 100 mL ultrapure water was introduced into 120 mL serum bottles and  
401 sealed with butyl rubber stoppers and aluminum crimp caps. The solution in the serum  
402 bottles was autoclaved and cooled at 25°C after being flushed with helium (He) gas  
403 (purity = 99.999%). Additional sulfite, sulfate, ammonium, and bicarbonate were  
404 introduced into the serum bottles as the “Sammox reaction system.” The  
405 above-mentioned ingredients were aseptically introduced to the serum bottles as  
406 follows: sodium sulfite, and sulfate (1 mL, 3 mM final concentration), ammonium



407 solution (0.5 mL, 6 mM final concentration for sulfite group; 0.5 mL, 8 mM final  
408 concentration for sulfate group), bicarbonate solution (1 mL, 20 mM final  
409 concentration). The initial pH value is roughly 8.2. The reaction systems were heated  
410 at 100°C in a water bath in the dark for 24 h, maintained at 70°C in the dark for 24 h,  
411 and removed from the water bath, and left to cool to room temperature before the  
412 investigation was conducted.

413 This investigation was performed employing the following series of experiments:

- 414 (i) 3 mM sulfite/sulfate/sulfide + 6/8 mM NH<sub>4</sub>Cl (for sulfate treatment group) + 20  
415 mM HCO<sub>3</sub><sup>-</sup>,  
416 (ii) 3 mM sulfite/sulfate/sulfide + 20 mM HCO<sub>3</sub><sup>-</sup>,  
417 (iii) 6/8 mM NH<sub>4</sub>Cl + 20 mM HCO<sub>3</sub><sup>-</sup>,  
418 (iv) ultrapure water

419

#### 420 **General procedure for the reductive amination of keto acids with HCOONH<sub>4</sub>**

421 To further confirm the feasibility of the reductive amination of keto acids with  
422 HCOONH<sub>4</sub>, We employed HCOONH<sub>4</sub>, pyruvic acid, oxaloacetate, and  
423 α-ketoglutarate (3.0 mM final concentration), as substrates in hydrothermal reaction  
424 systems. Serum bottles were heated at 70°C in a water bath in the dark for 48 h,  
425 maintained in the dark, and left to cool to room temperature before investigation. This  
426 investigation was conducted employing the following series of experiments:

- 427 (i) 3.0 mM HCOONH<sub>4</sub> + 3.0 mM pyruvic acid.  
428 (ii) 3.0 mM HCOONH<sub>4</sub> + 3.0 mM oxaloacetate.

429 (iii) 3.0 mM HCOONH<sub>4</sub> + 3.0 mM  $\alpha$ -ketoglutarate.

430

### 431 **Autocatalysis of the Sammox-driven CRNs**

432 We designed as simple as possible experiments to confirm whether the  
433 Sammox-driven CRNs already have autocatalysis. The experimental procedure was  
434 conducted in two rounds. In the first round procedure, serum bottles containing  
435 Sammox reaction solution were heated at 100°C in a water bath in the dark for 24 h,  
436 maintained at 70°C in the dark for another 24 h, and left to cool to room. One  
437 milliliter of the first round Sammox reaction solutions (sulfite/sulfate-fueled Sammox)  
438 was extracted, and injected into newly prepared Sammox reaction solution (the  
439 second round) (sulfite/sulfate-fueled Sammox) as a potential catalyst, respectively.  
440 The second round Sammox reaction was executed at two temperature settings 100°C  
441 24h–70°C and 45°C 48 h and allowed to cool to room temperature before sampling.  
442 See schemes 3 a, b for a detailed description of the experimental design.

443

### 444 **Peptides facilitate sulfite-fueled Sammox and Anammox reactions**

445 Serum bottles containing sulfite-fueled Sammox reaction solution were heated at  
446 100°C in a water bath in the dark for 24 h, maintained at 70°C in the dark for another  
447 24 h, and left to cool to room. One milliliter of the products was extracted and  
448 injected into newly prepared sulfite-fueled Sammox reaction solution (3.0 mM sulfite;  
449 6.0 mM ammonium) and Anammox reaction solution (6.0 mM nitrite; 6.0 mM  
450 ammonium), respectively, as a potential catalyst. The reactions were all executed at

451 100°C, 24h-70°C, 24h, and left to cool to room temperature before sampling for  
452 analysis of sulfite, sulfate, thiosulfate, nitrite, and ammonium.

453

#### 454 **Sampling analytical methods**

##### 455 **High-performance liquid chromatography quantitative analysis of peptides**

456 Solution samples were freeze-dried and diluted with ultrapure water to 1.0 mL.  
457 The High-performance liquid chromatography system (Agilent LC-1260, USA)  
458 comprised a Phenomenex Luna CN 5u column, which is a non-porous analytical  
459 column, packed with 5 µm particles (250 mm × 4.6 mm inner diameter, Phenomenex  
460 Inc, USA). Mobile phase A comprised 0.05 M sodium acetate, while solvent B was  
461 20% methanol–60% acetonitrile–20% ultrapure water. The samples were investigated  
462 utilizing isocratic elution circumstances with an eluent A/B (80:20) for 15 min. The  
463 flow rates of the mobile phase and the column temperature were set at 1 mL min<sup>-1</sup> and  
464 35°C, respectively. The detection wave was UV-214 nm by a diode array detector.  
465 Peptides were determined by comparing the retention times against commercially  
466 standard peptides. Peptide standard solutions were prepared with concentration  
467 gradients of 0, 50, 100, 175, 250, and 400 µg mL<sup>-1</sup>.

468

##### 469 **High-performance liquid chromatography quantitative analysis of thiosulfate**

470 The concentration of thiosulfate was determined employing an Agilent 1260  
471 Infinity HPLC system, equipped with a quaternary pump (Agilent, USA). Thiosulfate  
472 was separated with a Zorbax SB-C18 column (150 × 4.6 mm, 5 µm) and detected

473 utilizing a DAD detector at 215 nm. All analyses were performed at 40°C with a flow  
474 rate of 1 mL min<sup>-1</sup>. Na<sub>2</sub>HPO<sub>4</sub> was employed as the solvent. The pH of the solvent was  
475 modified with 1.0 M HCl to 8.5. Samples were filtered with 0.45 µm Cosmonice  
476 Filters (Millipore, Tokyo, Japan) and immediately injected into the HPLC system (Li  
477 et al., 2020).

478

#### 479 **Nano LC-MS/MS identification of peptides and amino acids**

480 Solution samples were freeze-dried and diluted with ultrapure water to 1.0 mL.  
481 The sample solution was reduced using 10 mM DTT at 56°C for 1 h and alkylated  
482 with 20 mM IAA at room temperature, in dark for 1 h. Thereafter, the extracted  
483 peptides were lyophilized to almost dryness and resuspended in 2–20 µL of 0.1%  
484 formic acid before LC-MS/MS investigation. LC-MS/MS investigation was executed  
485 on the UltiMate 3000 system (Thermo Fisher Scientific, USA) coupled to a Q  
486 Exactive™ Hybrid Quadrupole-Orbitrap™ Mass Spectrometer (Thermo Fisher  
487 Scientific, USA). The chromatographic separation of peptides was obtained using a  
488 nanocolumn—a 150 µm × 15 cm column—made in-house and packed with the  
489 reversed-phase ReproSil-Pur C18-AQ resin (1.9 µm, 100 Å, Dr. Maisch GmbH,  
490 Germany). A binary mobile phase and gradient were employed at a flow rate of 600  
491 mL min<sup>-1</sup>, directed into the mass spectrometer. Mobile phase A was 0.1% formic acid  
492 in the water, and mobile phase B was 0.1% formic acid in acetonitrile. LC linear  
493 gradient: from 6%–9% B for 5 min, from 9%–50% B for 45 min, from 50%–95% B  
494 for 2 min, and from 95%–95% B for 4 min. The injection volume was 5 µL. MS

495 parameters were set as follows: resolution at 70,000; AGC target at 3e6; maximum IT  
496 at 60 ms; the number of scan ranges at 1; scan range at 300 to 1,400 m/z; and  
497 spectrum data type was set to profile. MS/MS parameters were set as follows:  
498 resolution was set at 17,500; AGC target at 5e4; maximum IT at 80 ms; loop count at  
499 20; MSX count at 1; TopN at 20; isolation window at 3 m/z; isolation offset at 0.0 m/z;  
500 scan range at 200 to 2,000 m/z; fixed first mass at 100 m/z; stepped NCE at 27;  
501 spectrum data type at profile; intensity threshold at 3.1e4; and dynamic exclusion at  
502 15 s. The raw MS files were investigated and searched against target protein  
503 databases, based on the species of the samples utilizing Peaks studio and MaxQuant  
504 (1.6.2.10), combined with manual comparison in the UniProt and NCBI databases.  
505 The parameters were set as follows: protein modifications were  
506 carbamidomethylation (C) (fixed), oxidation (M) (variable), and acetylation (N-term)  
507 (variable); enzyme was set to unspecific; the maximum missed cleavages were set to  
508 2; the precursor ion mass tolerance was set to 20 ppm, and MS/MS tolerance was 20  
509 ppm. Only peptides determined with high confidence were chosen for downstream  
510 protein determination investigation.

511 For the analysis of amino acids content, solution samples were freeze-dried, and  
512 diluted with ultrapure water to 1.0 ml, followed by acid hydrolysis. A total of 10  $\mu$ L  
513 acid hydrolysate was mixed with 30  $\mu$ L acetonitrile, vortexed for 1 min, and  
514 centrifuged for 5 min at 13,200  $\text{r min}^{-1}$  at 4°C. Thereafter, 10  $\mu$ L of supernatant was  
515 introduced to 10  $\mu$ L water and vortexed for 1 min. Subsequently, 10  $\mu$ L of the mixture  
516 was introduced to 70  $\mu$ L of borate buffer (from AccQTag kit) and vortexed for 1 min.

517 A total of 20  $\mu\text{L}$  of AccQ Tag reagent (from AccQTag kit) was introduced to the  
518 sample, vortexed for 1 min, and the sample was left to stand at ambient temperature  
519 for 1 min. Finally, the solution was heated for 10 min at  $55^{\circ}\text{C}$ , and centrifuged for 2  
520 min at  $13,200\text{ r min}^{-1}$  and  $4^{\circ}\text{C}$ .

521 Multiple reaction monitoring investigations were done by utilizing a Xevo TQ-S  
522 mass spectrometer. All experiments were conducted in positive electrospray ionization  
523 (ESI+) mode. The ion source temperature and capillary voltage were kept constant  
524 and set to  $150^{\circ}\text{C}$  and 2 kV, respectively. The cone gas flow rate was  $150\text{ L h}^{-1}$  and the  
525 desolvation temperature was  $600^{\circ}\text{C}$ . The desolvation gas flow was 1,000 bar. The  
526 system was regulated with the analysis software.

527

528 **Ion chromatography quantitative analysis of sulfite, sulfate, nitrite, and**  
529 **ammonium.**

530 To determine sulfite, sulfate, and nitrite, 1.0 ml of the sample was filtered (0.22  
531  $\mu\text{m}$ ) to remove particulates that could interfere with ion chromatography. The ion  
532 chromatography system comprised an ICS-5000<sup>+</sup> SP pump (Thermo Fisher Scientific  
533 Inc. Sunnyvale, CA, USA), a column oven ICS-5000<sup>+</sup> DC, an electrochemical  
534 detector DC-5. The ion chromatography column system utilized was a Dionex Ionpac  
535 AS11-HC column. The operating condition was with an eluent of 30 mM KOH at a  
536 flow rate of  $1.0\text{ mL min}^{-1}$ . For the determination of ammonium, the ion  
537 chromatography column system employed was a Dionex Ionpac<sup>TM</sup> CS 12A column.  
538 The operating condition was with an eluent of 20 mM sulphonethane at a flow rate of

539 1.0 ml min<sup>-1</sup>.

540

#### 541 **ACKNOWLEDGMENTS**

542 This research was financially supported by the National Natural Science  
543 Foundation of China (General Program Nos. 42077287 and 41571240), and Ningbo  
544 Public Welfare project (202002N3101).

545

#### 546 **AUTHOR CONTRIBUTIONS**

547 Peng Bao conceived the study, designed and carried out the experiment, and  
548 wrote the manuscript. Yu-Qin He and Guo-Xiang Li carried out experiments and  
549 analysis. Peng Bao, Yu-Qin He, Guo-Xiang Li, Hui-En Zhang, and Ke-Qing Xiao  
550 contributed to interpreting the data. We thanks for Jun-Yi Zhao, Kun Wu, Juan Wang,  
551 Xiao-Yu Jia for carrying out sample analysis. Peng Bao wish to dedicate this research  
552 to the memory of Mr. Xian-Ming Bao for his kind encouragement and supporting.

553

#### 554 **COMPETING INTERESTS**

555 The authors declare no competing interests.

556

557

558

559

560

561 **REFERENCES**

- 562 Acehan, D., Santarella-Mellwig, R., and Devos, D.P. (2014). A bacterial  
563 tubulovesicular network. *J Cell Sci.* *127*, 277–280.
- 564 Amend, J.P., Rogers, K.L., Shock, E.L., Gurrieri, S., and Inguaggiato, S. (2003).  
565 Energetics of chemolithoautotrophy in the hydrothermal system of Vulcano  
566 Island, southern Italy. *Geobiology* *1*, 37–58.
- 567 Amend, J.P., and Shock, E.L. (2001). Energetics of overall metabolic reactions of  
568 thermophilic and hyperthermophilic Archaea and Bacteria. *FEMS Microbiol Rev.*  
569 *25*, 175–243.
- 570 Anbar, A.D. (2008). Elements and evolution. *Science* *322*, 1481–1483.
- 571 Balcerowiak, W. (1985). The thermal decomposition of HCOONa in presence of  
572 NaOH. *Thermochim Acta* *92*, 661–663.
- 573 Brochier, C., and Philippe, H. (2002). Phylogeny: a non-hyperthermophilic ancestor  
574 for bacteria. *Nature* *417*, 244.
- 575 Canfield, D.E., Rosing, M.T., and Bjerrum, C. (2006). Early anaerobic metabolism.  
576 *Phil. Trans. R. Soc. B.* *361*, 1819–1834.
- 577 Cavalier-Smith, T., and Chao, E.E.Y. (2020). Multidomain ribosomal protein trees and  
578 the planctobacterial origin of neomura (eukaryotes, archaeobacteria). *Protoplasma*  
579 *257*, 621–753.
- 580 Lawson, C.E., Nuijten, G.H.L., de Graaf, R.M., Jacobson, T.B., Pabst, M., Stevenson,  
581 D.M., Jetten, M.S.M., Noguera, D.R., McMahon, K.D., Amador-Noguez, D., and  
582 Lückner, S. (2021). Autotrophic and mixotrophic metabolism of an anammox



- 583 bacterium revealed by in vivo  $^{13}\text{C}$  and  $^2\text{H}$  metabolic network mapping. *ISME J.*  
584 *15*, 673–687.
- 585 Colman, D.R., Lindsay, M.R., Amenabar, M.J., Fernandes-Martins, M.C., Roden,  
586 E.R., and Boyd, E.S. (2020). Phylogenomic analysis of novel Diaforarchaea is  
587 consistent with sulfite but not sulfate reduction in volcanic environments on  
588 early Earth. *ISME J* *14*, 1316–1331.
- 589 Crane, B.R., and Getzoff, E.D. (1996). The relationship between structure and  
590 function for the sulfite reductases. *Curr. Opin. Struct. Biol.* *6*, 744–756.
- 591 Crane, B.R., Siegel, L.M., and Getzoff, E.D. (1995). Sulfite reductase structure at 1.6  
592 angstrom—evolution and catalysis for reduction of inorganic anions. *Science*  
593 *270*, 59–67.
- 594 Crowe, S.A., Paris, G., Katsev, S., Jones, C., Kim, S.T., Zerkle, A.L., Nomosatryo, S.,  
595 Fowle, D.A., Adkins, J.F., Sessions, A.L., et al. (2014). Sulfate was a trace  
596 constituent of Archean seawater. *Science* *346*, 735–739.
- 597 Davis, B.K. (2002). Molecular evolution before the origin of species. *Prog. Biophys.*  
598 *Mol. Biol.* *79*, 77–133.
- 599 Devos, D.P., and Reynaud, E.G. (2010). Intermediate steps. *Science* *330*, 1187–1188.
- 600 Dhillon, A., Goswami, S., Riley, M., Teske, A., and Sogin, M. (2005). Domain  
601 evolution and functional diversification of sulfite reductases. *Astrobiology* *5*,  
602 18–29.
- 603 Eck, R.V., and Dayhoff, M.O. (1966). Evolution of the structure of ferredoxin based  
604 on living relics of primitive amino acid sequences. *Science* *152*, 363–366.

- 605 Falkowski, P.G., Fenchel, T., and Delong, E.F. (2008). The microbial engines that  
606 drive Earth's biogeochemical cycles. *Science* *320*, 1034–1039.
- 607 Fdz-Polanco, F., Fdz-Polanco, M., Fernandez, N., Uruena, M.A., Garcia, P.A., and  
608 Villaverde, S. (2001). Combining the biological nitrogen and sulfur cycles in  
609 anaerobic conditions. *Water Sci. Technol.* *44*, 77–84.
- 610 Frenkel-Pinter, M., Samanta, M., Ashkenasy, G., and Leman, L.J. (2020). Prebiotic  
611 peptides: Molecular hubs in the origin of life. *Chem. Rev.* *120*, 4707– 4765.
- 612 Grein, F., Ramos, A.R., Venceslau, S.S., and Pereira, I.A.C. (2013). Unifying  
613 Concepts in anaerobic respiration: Insights from dissimilatory sulfur metabolism.  
614 *BBA-Bioenerg.* *1827*, 145–160.
- 615 Gutekunst, K. (2018). Hypothesis on the synchronistic evolution of autotrophy and  
616 heterotrophy. *Trends Biochem. Sci.* *43*, 402–411.
- 617 Güven, D., Dapena, A., Kartal, B., Schmid, M.C., Maas, B., van de Pas-Schoonen, K.,  
618 Sozen, S., Mendez, R., Op den Camp, H.J.M., Jetten, M.S.M., et al. (2005).  
619 Propionate oxidation by and methanol inhibition of anaerobic  
620 ammonium-oxidizing bacteria. *Appl Environ Microbiol.* *71*, 1066–1071.
- 621 Hartman, H. (1975). Speculations on the origin and evolution of metabolism. *J. Mol.*  
622 *Evol.* *4*, 359–370.
- 623 He, R.T., Hu, B.Y., Zhong, H., Jin, F.M., Fan, J.J., Hu, Y.H., and Jing, Z.Z. (2019).  
624 Reduction of CO<sub>2</sub> with H<sub>2</sub>S in a simulated deep-sea hydrothermal vent system.  
625 *Chem. Commun.* *55*, 1056–1059.
- 626 Heinen, W., and Lauwers, A.M. (1996). Organic sulfur compounds resulting from the

- 627 interaction of iron sulfide, hydrogen sulfide and carbon dioxide in an anaerobic  
628 aqueous environment. *Orig. Life Evol. Biosph.* 26, 131–150.
- 629 Hordijk, W., Steel, M., and Dittrich, P. (2018). Autocatalytic sets and chemical  
630 organizations: modeling self-sustaining reaction networks at the origin of life.  
631 *New J. Phys.* 20, 015011.
- 632 Jarvo, E.R., and Miller, S.J. (2002). Amino acids and peptides as asymmetric  
633 organocatalysts. *Tetrahedron* 58, 2481–2495.
- 634 Kartal, B., Kuypers, M.M.M., Lavik, G., Schalk, J., den Camp, H.J.M.O., Jetten,  
635 M.S.M., and Strous, M. (2007). Anammox bacteria disguised as denitrifiers:  
636 nitrate reduction to dinitrogen gas via nitrite and ammonium. *Environ Microbiol.*  
637 9, 635–642.
- 638 Kauffman, S.A. (1986). Autocatalytic Sets of Proteins. *J. Theor. Biol.* 119, 1–24.
- 639 Kuenen, J.G. (2020). Anammox and beyond. *Environ. Microbiol.* 22, 525–536.
- 640 Lee, D.H., Granja, J.R., Martinez, J.A., Severin, K., and Ghadiri, M.R. (1996). A  
641 self-replicating peptide. *Nature* 382, 525–528.
- 642 Leman, L., Orgel, L., and Ghadiri, M.R. (2004). Carbonyl sulfide-mediated prebiotic  
643 formation of peptides. *Science* 306, 283–286.
- 644 Leman, L.J., Huang, Z.Z., and Ghadiri, M.R. (2015). Peptide bond formation in water  
645 mediated by carbon disulfide. *Astrobiology* 15, 709–716.
- 646 Li, G.X., Li, H., Xiao, K.Q., and Bao, P. (2020a). Thiosulfate reduction coupled with  
647 anaerobic ammonium oxidation by *Ralstonia* sp. GX3-BWBA. *ACS Earth Space*  
648 *Chem.* 4, 2426–2434.

- 649 Li, H., Wu, S.Y., Wu, Y.Q., Huang, S., and Gao, J.S. (2020b). Process characteristics  
650 and mechanism of Na<sub>2</sub>CO<sub>3</sub>-catalyzed water-gas shift reaction in a  
651 benzene-containing hydrothermal system. *Fuel* 275, 117917.
- 652 Li, Y., and Keppler, H. (2014). Nitrogen speciation in mantle and crustal fluids.  
653 *Geochim. Cosmochim. Acta* 129, 13–32.
- 654 Liu, L.Y., Xie, G.J., Xing, D.F., Liu, B.F., Ding, J., Cao, G.L., and Ren, N.Q. (2021).  
655 Sulfate dependent ammonium oxidation: A microbial process linked nitrogen with  
656 sulfur cycle and potential application. *Environ Res.* 192, 110282.
- 657 Lonhienne, T.G., Sagulenko, E., Webb, R.I., Lee, K.C., Franke, J., Devos, D.P.,  
658 Nouwens, A., Carroll, B.J., and Fuerst, J.A. (2010). Endocytosis-like protein  
659 uptake in the bacterium *Gemmata obscuriglobus*. *Proc. Natl. Acad. Sci. U. S. A.*  
660 107, 12883–12888.
- 661 Mikhail, S., and Sverjensky, D.A. (2014). Nitrogen speciation in upper mantle fluids  
662 and the origin of Earth's nitrogen-rich atmosphere. *Nat. Geosci.* 7, 816–819.
- 663 Molitor, M., Dahl, C., Molitor, I., Schafer, U., Speich, N., Huber, R., Deutzmann, R.,  
664 and Truper, H.G. (1998). A dissimilatory sirohaem-sulfite-reductase-type protein  
665 from the hyperthermophilic archaeon *Pyrobaculum islandicum*. *Microbiology*  
666 144, 529–541.
- 667 Moore, E.K., Jelen, B.I., Giovannelli, D., Raanan, H., and Falkowski, P.G. (2017).  
668 Metal availability and the expanding network of microbial metabolisms in the  
669 Archaean eon. *Nat. Geosci.* 10, 629–636.
- 670 Ono, S., Eigenbrode, J.L., Pavlov, A.A., Kharecha, P., Rumble, D. Kasting, J.F., and

- 671 Freeman, K.H. (2003). New insights into Archean sulfur cycle from  
672 mass-independent sulfur isotope records from the Hamersley basin, Australia.  
673 *Earth Planet. Sci. Lett.* *213*, 15–30.
- 674 Reynaud, E.G., and Devos, D.P. (2011). Transitional forms between the three domains  
675 of life and evolutionary implications. *Proc. Biol. Sci.* *278*, 3321–3328.
- 676 Ruiz-Bermejo, M., de la Fuente, J.L., Rogero, C., Menor-Salvan, C., Osuna-Esteban,  
677 S., and Martín-Gago, J.A. (2012). New insights into the characterization of  
678 'insoluble black HCN polymers'. *Chem. Biodivers.* *9*, 25–40.
- 679 Sakthivel, K., Notz, W., Bui, T., and Barbas, C.F. (2001). Amino acid catalyzed direct  
680 asymmetric aldol reactions: A bioorganic approach to catalytic asymmetric  
681 carbon-carbon bond-forming reactions. *J. Am. Chem. Soc.* *123*, 5260–5267.
- 682 Saladino, R., Botta, G., Pino, S., Costanzo, G., and Di Mauro, E. (2012). Genetics first  
683 or metabolism first? The formamide clue. *Chem. Soc. Rev.* *41*, 5526–5565.
- 684 Schrum, H.N., Spivack, A.J., Kastner, M., and D'Hondt, S. (2009). Sulfate-reducing  
685 ammonium oxidation: A thermodynamically feasible metabolic pathway in  
686 subsurface sediment. *Geology* *37*, 939–942.
- 687 Strous, M., Pelletier, E., Mangenot, S., Rattei, T., Lehner, A., Taylor, M.W., Horn, M.,  
688 Daims, H., Bartol-Mavel, D., Wincker, P., et al. (2006). Deciphering the  
689 evolution and metabolism of an anammox bacterium from a community genome.  
690 *Nature* *440*, 790–794.
- 691 Trifonov, E.N., Volkovich, Z., and Frenkel, Z.M. (2012). Multiple levels of meaning  
692 in DNA sequences, and one more. *Ann. N Y Acad. Sci.* *1267*, 35–38.

693 van Niftrik, L., and Jetten, M.S.M. (2012). Anaerobic ammonium-oxidizing bacteria:  
694 unique microorganisms with exceptional properties. *Microbiol. Mol. Biol. Rev.*  
695 *76*, 585–596.

696 Wagner, M., Roger, A. J., Flax, J. L., Brusseau, G. A. and Stahl, D. A. (1998).  
697 Phylogeny of dissimilatory sulfite reductases supports an early origin of sulfate  
698 respiration. *J Bacteriol* *180*, 2975–2982.

699 Wang, Y.Q., Jin, F.M., Zeng, X., Ma, C.X, Wang, F.W., Yao, G.D, and Jing, Z.Z.  
700 (2013). Catalytic activity of Ni<sub>3</sub>S<sub>2</sub> and effects of reactor wall in hydrogen  
701 production from water with hydrogen sulphide as a reducer under hydrothermal  
702 conditions. *Appl Energy* *104*, 306–309.

703 Wang, W., Li, Q.L., Yang, B., Liu, X.Y., Yang, Y.Q., and Su, W.H. (2012).  
704 Photocatalytic reversible amination of  $\alpha$ -keto acids on a ZnS surface:  
705 implications for the prebiotic metabolism. *Chem. Commun.* *48*, 2146–2148.

706 Wong, J.T.F. (2005). Coevolution theory of genetic code at age thirty. *Bioessays* *27*,  
707 416–425.

708 Wu, H.G., Yu, Z.Z., Li, Y., Xu, Y.F., Li, H., and Yang, S. (2020). Hot water-promoted  
709 catalyst-free reductive cycloamination of (bio-)keto acids with HCOONH<sub>4</sub>  
710 toward cyclic amides. *J. Supercrit. Fluids* *157*, 104698.

711

712

713

714

715

716 **Table 1. Proteinogenic amino acids abundance in peptides, and in reactions of**  
717 **ammonium formate (AF) with  $\alpha$ -keto acids. The associated errors are standard**  
718 **deviations of three replicates. ND, not detected.**

| Amino acids  | Concentrations ( $\mu$ M) |                     |                 |                    |                              |
|--------------|---------------------------|---------------------|-----------------|--------------------|------------------------------|
|              | Sulfite-fueled CRNs       | Sulfate-fueled CRNs | AF + pyruvate   | AF + oxaloacetate  | AF + $\alpha$ -ketoglutarate |
| L-Serine     | 4.96 $\pm$ 1.35           | 3.54 $\pm$ 0.65     | 3.20 $\pm$ 1.17 | 1.92 $\pm$ 0.90    | 3.26 $\pm$ 1.67              |
| Glycine      | 3.25 $\pm$ 0.38           | 2.92 $\pm$ 0.73     | 3.08 $\pm$ 1.02 | 2.76 $\pm$ 1.42    | 5.25 $\pm$ 2.32              |
| L-Aspartate  | 2.42 $\pm$ 0.39           | 0.97 $\pm$ 0.46     | 1.03 $\pm$ 0.22 | 0.77 $\pm$ 0.33    | 1.79 $\pm$ 0.63              |
| L-Glutamate  | 1.81 $\pm$ 0.26           | 10.14 $\pm$ 4.17    | 1.48 $\pm$ 0.24 | 3.73 $\pm$ 1.12    | 46.93 $\pm$ 10.92            |
| L-Alanine    | 2.66 $\pm$ 0.38           | 1.81 $\pm$ 0.52     | 1.83 $\pm$ 0.18 | 268.25 $\pm$ 35.69 | 2.02 $\pm$ 0.21              |
| L-Asparagine | 0.36 $\pm$ 0.22           | ND                  | ND              | ND                 | ND                           |
| L-Threonine  | 0.77 $\pm$ 0.28           | 0.73 $\pm$ 0.24     | ND              | 1.12 $\pm$ 0.89    | 0.99 $\pm$ 0.29              |
| L-Arginine   | 0.40 $\pm$ 0.15           | 0.55 $\pm$ 0.03     | ND              | ND                 | 0.79 $\pm$ 0.44              |
| L-Histidine  | 0.53 $\pm$ 0.14           | 0.64 $\pm$ 0.14     | ND              | ND                 | ND                           |
| L-Proline    | 0.57 $\pm$ 0.05           | 0.59 $\pm$ 0.09     | ND              | ND                 | 0.68 $\pm$ 0.24              |
| L-Lysine     | 0.44 $\pm$ 0.05           | 0.50 $\pm$ 0.21     | ND              | ND                 | 0.88 $\pm$ 0.31              |
| L-Tyrosine   | 0.53 $\pm$ 0.34           | ND                  | ND              | ND                 | ND                           |
| L-Valine     | 0.49 $\pm$ 0.07           | 0.53 $\pm$ 0.14     | 0.72 $\pm$ 0.19 | ND                 | 0.82 $\pm$ 0.32              |
| L-Leucine    | 0.67 $\pm$ 0.09           | 0.74 $\pm$ 0.18     | 0.97 $\pm$ 0.19 | 0.78 $\pm$ 0.28    | 1.20 $\pm$ 0.55              |

719

720

721

722

723

724

725

726

727

728

729

730 **Table 2. Identified selected peptides in SammoX-driven CRNs. Sulfi, peptides**

731 **from sulfite-fueled CRNs; Sulfa, peptides from sulfate-fueled CRNs.**

| Peptides ID | Denovo peptides  | m/z      | Area     | Score | ppm   |
|-------------|------------------|----------|----------|-------|-------|
| Sulfi-1     | NHVALAGK         | 405.2346 | 9.88E+05 | 91    | -1.1  |
| Sulfi-2     | PPLPRNN          | 404.2218 | 6.79E+05 | 80    | -13.4 |
| Sulfi-3     | P(+42.01)VLLPPLA | 431.2729 | 2.65E+06 | 71    | -6.8  |
| Sulfi-4     | PGKELPLA         | 412.7466 | 1.34E+06 | 69    | -2    |
| Sulfi-5     | VVVAAKTPPLA      | 533.3416 | 3.44E+04 | 68    | 8.6   |
| Sulfi-6     | TLVVL PNA        | 413.7555 | 2.79E+06 | 67    | 0.5   |
| Sulfi-7     | VVVKLLPV         | 433.8078 | 1.32E+05 | 67    | 1.2   |
| Sulfi-8     | V(+42.01)YLPL    | 323.6943 | 1.55E+05 | 66    | 0.5   |
| Sulfi-9     | GPKDST           | 604.3033 | 1.47E+06 | 65    | 16    |
| Sulfi-10    | PPPLTTLA         | 405.242  | 8.51E+05 | 65    | 0     |
| Sulfa-1     | AAVLEKLE         | 436.7605 | 5.53E+06 | 99    | 5.7   |
| Sulfa-2     | DVLLSK           | 337.7093 | 7.34E+07 | 99    | 4.6   |
| Sulfa-3     | GHEVTLEALPK      | 597.3336 | 4.69E+07 | 99    | 6.1   |
| Sulfa-4     | LAEGALDKGHEVTL   | 726.8925 | 5.69E+07 | 99    | 5.8   |
| Sulfa-5     | LALEGAL          | 686.4097 | 3.10E+06 | 99    | 2.1   |
| Sulfa-6     | VATVSLPR         | 421.7609 | 3.09E+07 | 98    | 6.1   |
| Sulfa-7     | LLSSLGDEE        | 962.4675 | 2.32E+06 | 99    | -0.1  |
| Sulfa-8     | LTLTE            | 576.3276 | 5.60E+07 | 99    | 6.3   |
| Sulfa-9     | LSSLGDEE         | 849.3886 | 2.04E+07 | 99    | 6     |
| Sulfa-10    | TNYGPAGPA        | 424.2029 | 1.24E+06 | 71    | 4.9   |

732

733

734
