1 **Sulfur reduction coupled with anaerobic ammonium oxidation drove prebiotic**

2 **proto-anabolic networks**

3 Peng Bao <sup>1,2,\*</sup>, Guo-Xiang Li <sup>1,2,3</sup>, Jun-Yi Zhao <sup>1,2</sup>, Kun Wu <sup>1,2</sup>, Juan Wang <sup>1,2</sup>, Xiao-Yu

4 Jia <sup>1,2</sup>, Hui-En Zhang <sup>4</sup>, Yu-Qin He <sup>1,2,5</sup>, Hu Li <sup>1</sup>, Ke-Qing Xiao <sup>6</sup>

5

6 <sup>1</sup> Key Lab of Urban Environment and Health, Institute of Urban Environment, Chinese  
7 Academy of Sciences, Xiamen 361021, P. R. China

8 <sup>2</sup> Ningbo Urban Environment Observation and Station, Chinese Academy of Sciences,  
9 Ningbo 315800, P. R. China

10 <sup>3</sup> Center for Applied Geosciences (ZAG), Eberhard Karls University Tuebingen,  
11 Sigwartstrasse 10, Tuebingen 72076, Germany

12 <sup>4</sup> College of Biological and Environmental Sciences, Zhejiang Wanli University,  
13 Ningbo 315100, P. R. China

14 <sup>5</sup> University of Chinese Academy of Sciences, Beijing 100049, P. R. China

15 <sup>6</sup> School of Earth and Environment, University of Leeds, Leeds LS2 9JT, UK

16 **\*Corresponding Author**

17 Institute of Urban Environment, Chinese Academy of Sciences, Xiamen 361021, P. R.

18 China; E-mail: [pbao@iue.ac.cn](mailto:pbao@iue.ac.cn)

19

## 20 SUMMARY

21 The geochemical energy that drove the transition from geochemistry to  
22 biochemistry on early Earth remains unknown. Here, we show that the reduction of  
23 sulfurous species, such as thiosulfate, sulfite, elemental sulfur, and sulfate, coupled  
24 with anaerobic ammonium oxidation (Sammox), could have provided the primordial  
25 redox equivalents and proton potential for prebiotic proto-anabolic networks  
26 consisting of the reductive acetyl-CoA pathway combined with the incomplete  
27 reductive tricarboxylic acid (rTCA) cycle under mild hydrothermal conditions.  
28 Sammox-driven prebiotic proto-anabolic networks (SPPN) include CO<sub>2</sub> reduction,  
29 esterification, reductive amination, pyrrole synthesis, and peptides synthesis, in one  
30 geochemical setting. Iron-sulfur (FeS) minerals, as the proto-catalysts, enhanced the  
31 efficiency of SPPN. Thiols/thioesters were used as the energy currency in  
32 non-enzymatic phosphate-independent metabolism and accelerated SPPN. Peptides  
33 that consisted of 15 proteinogenic amino acids were the end products of SPPN with  
34 bicarbonate as the only source of carbon. Most peptides shared high similarity with  
35 the truly minimal protein content (TMPC) of the last universal common ancestor  
36 (LUCA). The peptides and/or proteinogenic amino acids might have endowed SPPN  
37 with autocatalysis and homochirality. Thus, Sammox drove the coupling  
38 transformation of carbon, hydrogen, oxygen, nitrogen, sulfur, and/or iron  
39 simultaneously in the far-from-equilibrium environment, thereby initiating the  
40 emergence of biochemistry. The existing Sammox microorganisms might belong to  
41 the phylum of *Planctomycetes*, and might be transitional forms between the three

42 domains of life.

43

44

## 45 INTRODUCTION

46 The chemistry of life is based on reduction-oxidation (redox) reactions that  
47 comprise successive transfers of electrons and protons from the six major  
48 elements—carbon (C), hydrogen (H), oxygen (O), nitrogen (N), sulfur (S), and  
49 phosphorous (P)<sup>1-3</sup>. The H<sub>2</sub>/CO<sub>2</sub> redox couple has been proposed as the first energy  
50 source to drive the reductive acetyl-CoA pathway, an ancient metabolic route<sup>4-7</sup>;  
51 however, the primordial energy source of this redox couple suffers from the difficulty  
52 that the exergonic reaction competes with the endergonic reaction for available H<sub>2</sub><sup>8</sup>.  
53 The subsequent theories on surface metabolism and thioesters could not explain how  
54 the required reduced carbon compounds were synthesized with CO<sub>2</sub> as a substrate<sup>9,10</sup>,  
55 but did emphasize the important roles of thioesters and metal sulfide (FeS) catalysts in  
56 driving the primordial reductive tricarboxylic acid (rTCA) cycle, which is a central  
57 anabolic biochemical pathway whose origins have been proposed to trace back to  
58 geochemistry<sup>9, 11, 12</sup>. It might be more plausible that proto-anabolic networks,  
59 consisting of the reductive acetyl-CoA pathway, together with the incomplete rTCA  
60 cycle, which might be catalyzed by FeS and/or thioesters, were spontaneously driven  
61 into existence as a mechanism by which to dissipate geochemical redox gradients<sup>3</sup>,  
62<sup>13-17</sup>. We realize that there could have been a redox reaction which involved all major  
63 elements, and it makes sense that this redox reaction should have been catalyzed by  
64 FeS minerals and/or facilitated by thioesters. The roles played by the geochemical  
65 transformations of nitrogen and sulfur in the origin of life have been largely ignored  
66 because a computational analysis has suggested that nitrogen and sulfur were essential

67 for thermodynamically feasible phosphate-independent metabolism before the rise of  
68 the last universal common ancestor (LUCA) <sup>18</sup>. Phylogenetic distribution and  
69 functional grouping of sulfite reductase clusters suggest that a sulfite reductase,  
70 containing coupled siroheme-[Fe<sub>4</sub>-S<sub>4</sub>] cluster, was most likely present in the LUCA <sup>2</sup>,  
71 <sup>19-21</sup>. Sulfite reductases from some sources can catalyze the reduction of both sulfite  
72 and nitrite <sup>22</sup>, implying that S and N biochemistry may have a common evolutionary  
73 origin. Thus, the proto-anabolic networks might have been driven by carbon,  
74 hydrogen, oxygen, nitrogen, sulfur, and/or iron coupling transformations in the  
75 far-from-equilibrium environments. We speculated that thermodynamically feasible  
76 reduction coupling of sulfurous species with anaerobic ammonium oxidation reaction  
77 <sup>23-27</sup> (Eqs. 1, 2, 3, and 4; at 70 and 100°C), with or without the FeS and thioester  
78 catalyst, might have been the prebiotically relevant reaction for the creation of  
79 prebiotic proto-anabolic networks. The redox reaction between elemental sulfur and  
80 ammonium is not possible according to the value of  $\Delta G^0$  (Eq. 3). However, if the  
81 concentration of elemental sulfur and ammonium reached 1 mM and the  
82 concentrations of reaction products were 0.01 mM,  $\Delta G^0_r$  will be  $-22.78 \text{ kJ mol}^{-1}$  at  
83 70°C and  $-31.99 \text{ kJ mol}^{-1}$  at 100 °C.

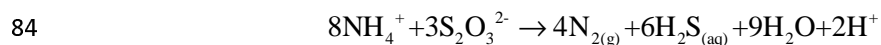

85 (70°C,  $\Delta G^0 = -167.2 \text{ kJ mol}^{-1}$ ; 100°C,  $\Delta G^0 = -194.35 \text{ kJ mol}^{-1}$ ) (Equation 1)

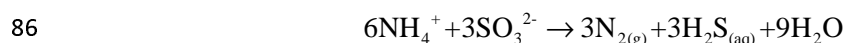

87 (70°C,  $\Delta G^0 = -332.04 \text{ kJ mol}^{-1}$ ; 100°C,  $\Delta G^0 = -370.77 \text{ kJ mol}^{-1}$ )(Equation 2)

88

89  $(70^{\circ}\text{C}, \Delta G^0 = 62.81 \text{ kJ mol}^{-1}; 100^{\circ}\text{C}, \Delta G^0 = 53.6 \text{ kJ mol}^{-1})$  (Equation 3)

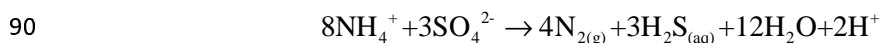

91  $(70^{\circ}\text{C}, \Delta G^0 = -113.38 \text{ kJ mol}^{-1}; 100^{\circ}\text{C}, \Delta G^0 = -152.98 \text{ kJ mol}^{-1})$  (Equation 4)

92 On early Earth, usually referred to as Earth in its first one billion years, sulfite,  
93 elemental sulfur, and thiosulfate were abundantly produced from volcanic and  
94 hydrothermal  $\text{SO}_2$  or from the oxidation of  $\text{H}_2\text{S}$  by iron oxides in the sulfide-rich  
95 hydrothermal fluid <sup>2, 13, 28</sup>. The nitrogen species in these fluids released from the  
96 mantle of the reduced young Earth into the early oceans might have comprised mostly  
97  $\text{NH}_3$  <sup>29,30</sup>. The  $\text{CO}_2$  concentration in the oceans on early Earth would have been much  
98 higher than that in the oceans today because there was perhaps up to 1,000 times more  
99  $\text{CO}_2$  in the atmosphere <sup>31</sup>. Hence, when the prebiotically plausible sulfurous species  
100 and  $\text{NH}_3$  in the Hadean hydrothermal systems contacted  $\text{CO}_2$ , spontaneous redox  
101 reaction transfers for energy generation and organic molecule synthesis via the  
102 reduction of sulfurous species coupled with ammonium oxidation occurred. As sulfate  
103 would have been severely limited in ancient oceans <sup>2, 3, 32</sup>, we termed this process  
104 Sammox, which more likely used thiosulfate, sulfite, and elemental sulfur as electron  
105 acceptors instead of sulfate, particularly in the Hadean hydrothermal systems.

106 The phosphate-independent prebiotic proto-anabolic networks should have at  
107 least started with carbon fixation and continued until peptides synthesis, as peptides  
108 are at the heart of life and the best-known biocatalysts in the cell. Therefore, a  
109 prebiotic reaction that led to the origin of life should have contributed to the  
110 autocatalysis and evolution of the prebiotic proto-anabolic networks. A robust idea on

111 the origin of life should be able to explain the origin of homochirality of biological  
112 molecules (the use of only left-handed amino acids and only right-handed sugars), as  
113 it is a basic feature of life and should have come along with the origin of life. Here,  
114 we present prebiotic chemical evidences of Sammox-driven, prebiotic, reductive  
115 acetyl-CoA pathway combined with the incomplete rTCA cycle under hydrothermal  
116 conditions. The scenario of CO<sub>2</sub> fixation, bio-molecule synthesis, peptides formation,  
117 and the origin of autocatalysis and homochirality in one geochemical setting will  
118 provide profound insights into the earliest origins of life and fill in the gap in the  
119 understanding of the emergence from geochemistry to biochemistry.

120

## 121 **RESULTS AND DISCUSSION**

### 122 **Sammox drives the emergence and combination of the prebiotic reductive** 123 **acetyl-CoA pathway with incomplete rTCA cycle**

124 The aim of this study was to first verify the feasibility of a Sammox-driven  
125 prebiotic reductive acetyl-CoA pathway, an incomplete rTCA cycle, and off-cycle  
126 reactions (esterification, reductive amination, and co-factor and peptide synthesis) in  
127 thiosulfate/sulfite/elemental sulfur/sulfate-fueled Sammox-driven prebiotic  
128 proto-anabolic networks (SPPN). Formate and acetate were the products of the  
129 Sammox-driven prebiotic reductive acetyl-CoA pathway with bicarbonate as the  
130 carbon source (Fig. 1), although formate was represented only in thiosulfate- and  
131 sulfate-fueled SPPN (Fig. 1a, d). We have not determined the presence of methanol  
132 but have qualitatively identified methyl acetate as a product in all sulfur-fueled SPPN

133 (Extended Data Fig. 1), which implies that methanol should be an intermediate of the  
134 Sammox-driven prebiotic reductive acetyl-CoA pathway. More importantly, this  
135 result confirmed the possibility of Sammox-powered esterification, which is critical  
136 for the synthesis of biopolymers<sup>33</sup>. We did not detect pyruvate as the end-product of  
137 the Sammox-driven prebiotic reductive acetyl-CoA pathway. When pyruvate was  
138 added to the SPPN, it quickly entered the incomplete rTCA cycle and was either  
139 consumed as a reaction substrate or was reductively aminated to amino acids (Figs. 2  
140 and 3).

141 We quantitatively identified succinate and  $\alpha$ -ketoglutarate as the products of the  
142 Sammox-driven prebiotic incomplete rTCA cycle (Figs. 1 and 2; Extended Data Fig.  
143 2). The presence of polypyrroles implied the generation of pyrrole from succinate, as  
144 the off-cycle reaction products of the Sammox-driven prebiotic incomplete rTCA  
145 cycle (Fig. 3; Extended Data Fig. 3). A few peptides were found to be the end  
146 products of SPPN, especially in thiosulfate and sulfite-fueled SPPN (Figs. 1 and 2).  
147 The yield of peptides was relatively low in sulfate and elemental sulfur-fueled SPPN  
148 (Figs. 1 and 2). In this study, peptides might be the final products of SPPN (Fig. 3).

149 To further prove the feasibility of the Sammox-driven prebiotic, incomplete  
150 rTCA cycle, we used oxaloacetate, malate, fumarate, succinate, and  $\alpha$ -ketoglutarate,  
151 as substrates in all sulfur-fueled SPPNs, and all eventually produced  $\alpha$ -ketoglutarate  
152 and/or peptides (Fig. 4; Extended Data Fig. 4a–d). Interestingly, we found fumarate,  
153 succinate,  $\alpha$ -ketoglutarate, and peptides as the products of malate amendment  
154 treatments in all sulfur-fueled SPPNs (Extended Data Fig. 4b), which suggested that



155 the generation of the intermediates was in accordance with the rTCA direction. Our  
156 results suggest that incomplete rTCA metabolites specifically inter-converted among  
157 the incomplete rTCA intermediates driven by SammoX. The SammoX-driven prebiotic  
158 reductive acetyl-CoA pathway and prebiotic, incomplete rTCA cycle integrated as  
159 prebiotic proto-anabolic networks.

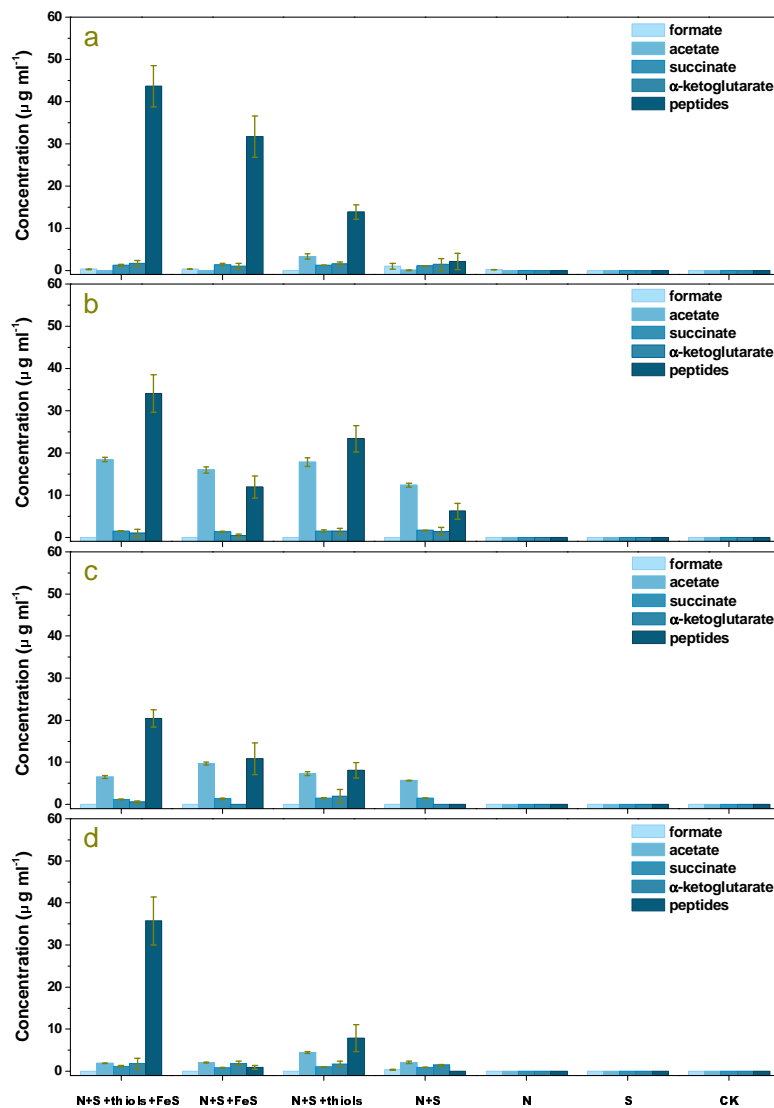

160

161 **Figure 1. Organic products generated from SammoX-driven prebiotic**  
162 **proto-anabolic networks (SPPN), with bicarbonate as the sole carbon source,**

163 **under hydrothermal conditions. Treatments were as follows (a, thiosulfate-fueled**  
164 **SPPN; b, sulfite-fueled SPPN; c, elemental sulfur-fueled SPPN; d, sulfate-fueled**  
165 **SPPN) from left to right: (i) sulfurous species, ammonium, FeS minerals, and**  
166 **methanethiol; (ii) sulfurous species, ammonium, and FeS minerals; (iii) sulfurous**  
167 **species, ammonium, and methanethiol; (iv) sulfurous species and ammonium; (v)**  
168 **ammonium; (vi) sulfurous species; (vii) CK. The bar chart shows the yields of**  
169 **formate, acetate, succinate,  $\alpha$ -ketoglutarate, and peptides in each treatment**  
170 **group. Error bars represent standard deviations of three replicates.**

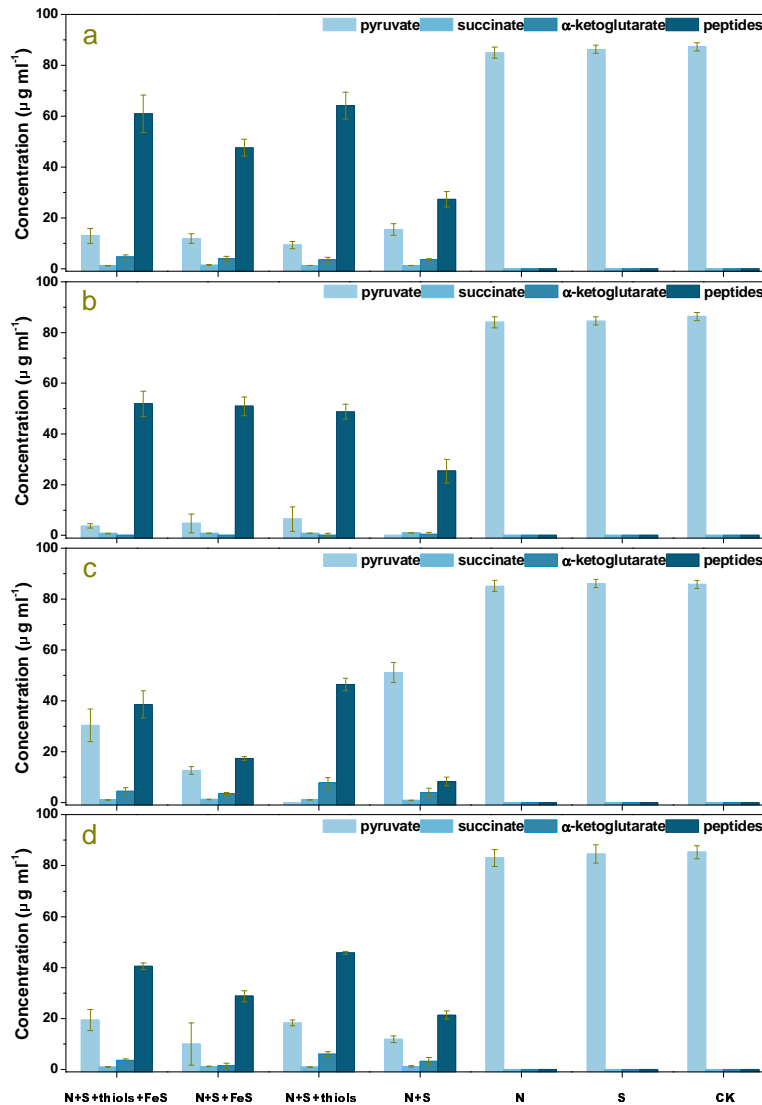

171

172 **Figure 2. Organic products of Sammox-driven prebiotic, incomplete rTCA cycle**

173 **with pyruvate as substrate under hydrothermal conditions. Treatments were as**

174 **follows (a, thiosulfate-fueled Sammox; b, sulfite-fueled Sammox; c, elemental**

175 **sulfur-fueled Sammox; d, sulfate-fueled Sammox) from left to right: (i) sulfurous**

176 **species, ammonium, FeS minerals, and methanethiol; (ii) sulfurous species,**

177 **ammonium, and FeS minerals; (iii) sulfurous species, ammonium, and**

178 **methanethiol; (iv) sulfurous species and ammonium; (v) ammonium; (vi)**

179 **sulfurous species; (vii) CK. The bar chart shows the concentrations of pyruvate,**  
 180 **succinate,  $\alpha$ -ketoglutarate, and peptides in each treatment group. Error bars**  
 181 **represent standard deviations of three replicates.**

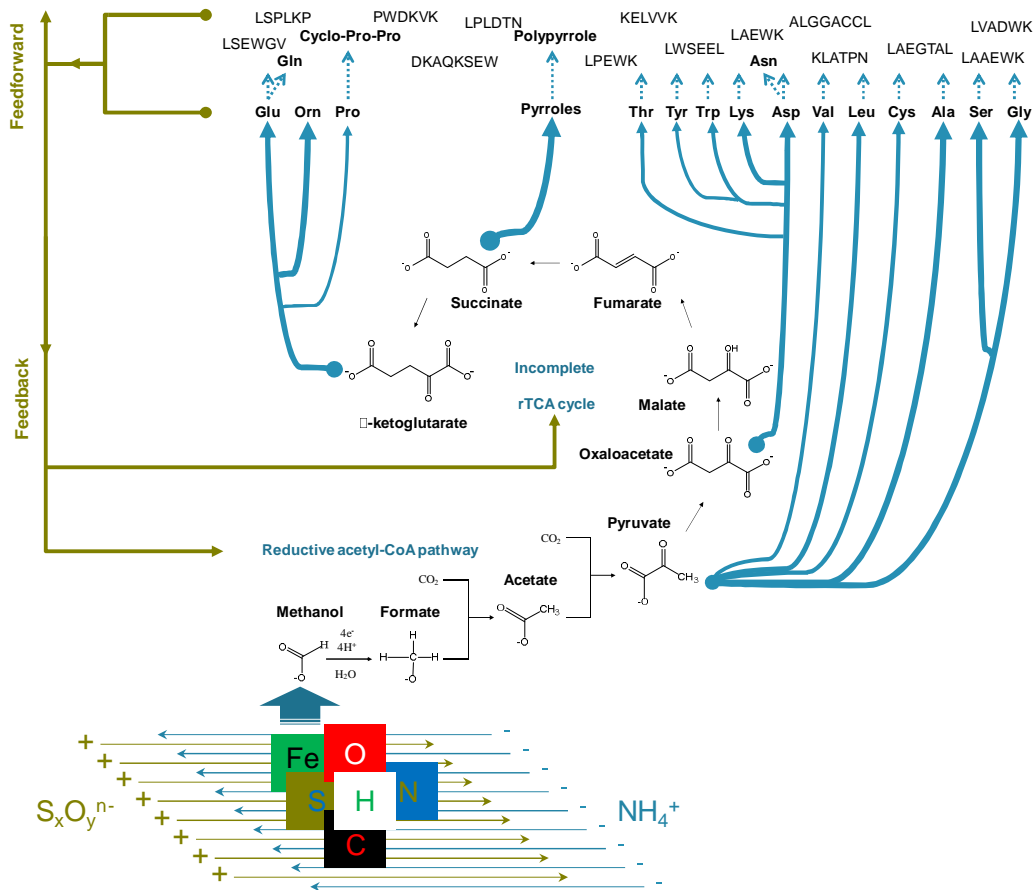

182  
 183 **Figure 3. The conceptual model of Sammox-driven coupling transformation of**  
 184 **carbon, hydrogen, oxygen, nitrogen, sulfur, and/or iron simultaneously in the**  
 185 **far-from-equilibrium environments, initiating the emergence of prebiotic**  
 186 **proto-anabolic networks, the combination of the reductive acetyl-CoA pathway,**  
 187 **and the incomplete rTCA cycle. Feedback and feedforward effects stem from the**  
 188 **products of SPPN, amino acids, and peptides.  $x = 1, 2$ ;  $y = 0, 3$ , or  $4$ ;  $n = 0, 2$ .**

189

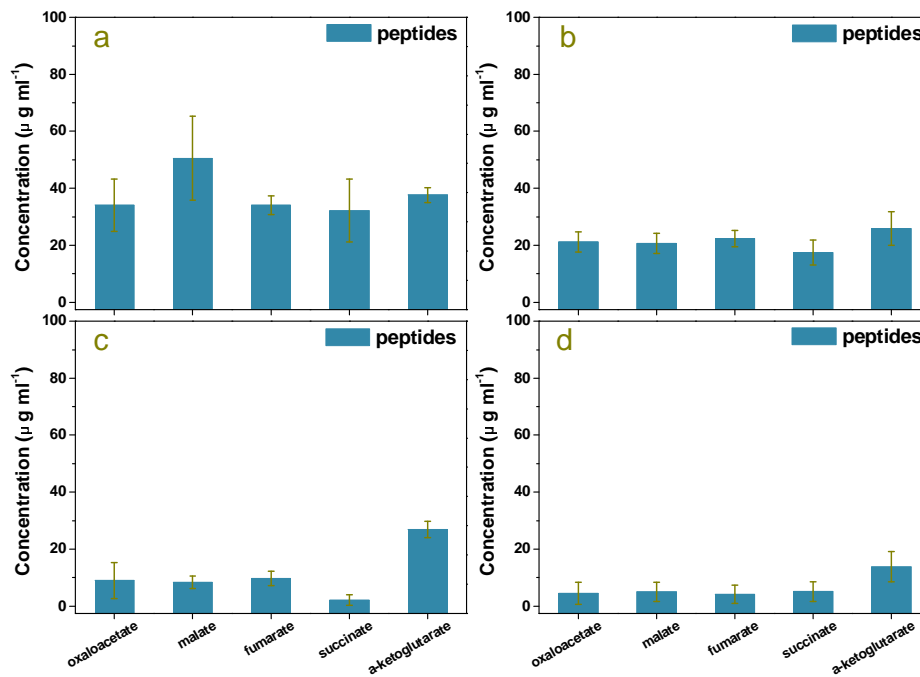

190

191 **Figure 4. Peptides generated from SammoX-driven prebiotic, incomplete rTCA**  
192 **cycle with oxaloacetate, malate, fumarate, succinate, and  $\alpha$ -ketoglutarate as**  
193 **substrates. Treatments were as follows (a, thiosulfate-fueled SammoX; b,**  
194 **sulfite-fueled SammoX; c, elemental sulfur-fueled SammoX; d, sulfate-fueled**  
195 **SammoX). The bar chart shows the concentrations of peptides in each treatment**  
196 **group. Error bars represent standard deviations of three replicates.**

197

#### 198 **The specificity and reasonability of SPPN**

199 As expected, SPPN should have adequate specificity to function in a sustained  
200 way. It is also critical that side-reactions that would disrupt SPPN are avoided <sup>14</sup>. To  
201 find out whether side-reactions could move materials irreversibly out of the  
202 incomplete rTCA cycle, we evaluated the most problematic reactions—the reductions  
203 of pyruvate and  $\alpha$ -ketoglutarate <sup>14</sup>. Our results showed that there were no reductions

204 of pyruvate to lactate or of  $\alpha$ -ketoglutarate to  $\alpha$ -hydroxyglutarate in all sulfur-fueled  
205 SPPNs (Figs. 1 and 2; Extended Data Figs. 2 and 4). Indeed, we did not find any  
206 unnecessary products in the SPPN. This suggests that SPPN is an efficient cycle, with  
207 naturally high specificity.

208 Both FeS minerals and methanethiol (used to synthesize thioesters) could  
209 enhance the efficiency of sulfur-fueled SPPN (Figs. 1 and 2). FeS cluster proteins are  
210 believed to be evolutionarily ancient and fundamental to central metabolism<sup>34</sup>. The  
211 physical and chemical principles are unchanged between biological and geological  
212 settings. Hence, it is logical that SPPNs could be catalyzed by FeS minerals as a  
213 proto-catalyst. Similarly, SPPN could be facilitated by thioesters as they were the  
214 energy currency before the emergence of adenosine triphosphate (ATP)<sup>18, 34</sup>.  
215 Methanethiol incorporates into the biochemical transformations of carbon, hydrogen,  
216 oxygen, and nitrogen through a thiol-thioester exchange<sup>9</sup>, transforming itself and  
217 other organic reaction products into new organic products, resulting in the coupling  
218 biochemical transformation of carbon, hydrogen, oxygen, nitrogen, and sulfur and the  
219 expansion of SPPN. FeS minerals and thioesters were all accessible for SPPN in  
220 ancient oceans. Thiosulfate and elemental sulfur were the main products of sulfide  
221 oxidation by metallic oxide under anaerobic conditions in ancient oceans<sup>35, 36</sup>. When  
222 thiosulfate and elemental sulfur-fueled SPPN occurred, FeS minerals and  
223 methanethiol were found to be present in the same geological setting. As FeS minerals,  
224 thiosulfate, and elemental sulfur are products of sulfide oxidation by ferric oxide, and  
225 methanethiol is the product when FeS reacts with H<sub>2</sub>S and CO<sub>2</sub><sup>37</sup>.

226 Thiosulfate and sulfite-fueled SPPNs are the most efficient, generating a  
227 considerable number of organic products even without the facilitation of FeS minerals  
228 and thioesters (Figs. 1 and 2). Sulfite, thiosulfate, and elemental sulfur-fueled  
229 Sammox reactions could be the primordial power source for the creation of SPPN,  
230 instead of sulfate-fueled Sammox reactions. Consistent with our results, the  
231 metabolism of ancestral sulfur was found to be likely by sulfite reduction, sulfur  
232 disproportionation, and disulfide disproportionation rather than sulfate reduction<sup>38</sup>.

### 233 **Conceivable emergence of autocatalysis and homochirality in SPPN**

234 Reductive amination occurred in SPPN as an off-cycle reaction of incomplete  
235 rTCA, with peptides as the end products. Moreover, we found that the peptide  
236 mixtures consisted of 15 proteinogenic amino acids, including alanine, glycine, valine,  
237 cystine, leucine, serine, aspartate, asparagine, lysine, glutamate, glutamine, tyrosine,  
238 threonine, tryptophan, and proline (Table 1 and 2; Fig. 5; Extended data Table 1;  
239 Extended data Fig. 5). The 15 proteinogenic amino acids required only a few steps in  
240 their metabolism from the incomplete rTCA (Fig. 3)<sup>39</sup>. Alanine, glycine, valine,  
241 cystine, leucine, and serine are closely linked to pyruvate (Fig. 3). Aspartate,  
242 asparagine, lysine, tyrosine, threonine, and tryptophan are linked to oxaloacetate (Fig.  
243 3). Glutamate, glutamine, and proline are linked to  $\alpha$ -ketoglutarate (Fig. 3).  
244 L-ornithine was also identified in our study (Table 2), which might have been derived  
245 from L-glutamate semialdehyde. Notably, compared to other amino acids, the  
246 frequency of the most ancient amino acids—glycine, alanine, aspartate, and  
247 glutamate—was relatively high (Table 2), which can be explained by many theories<sup>40</sup>.

248 <sup>41</sup>. The frequency of serine was also significantly high, as it is conserved in ancestral  
249 ferredoxin <sup>34</sup>. More importantly, the frequency of glycine, alanine, aspartate,  
250 glutamate, and serine as conserved amino acids is consistent with the stage of genetic  
251 code evolution <sup>42</sup>. Our results suggest that Sammox might be the right condition for  
252 the origin of life.

253       The combined results from determination of amino acid content and peptide  
254 identification showed that 56 SPPN-generated peptides shared similarity with truly  
255 minimal protein content (TMPC) of LUCA, with only one exception, covering all  
256 categories of TMPC, including electron transport, metabolism,  
257 replication/recombination/repair/modification, transcription/regulation,  
258 translation/ribosome, RNA processing, cellular processes, and transport/membrane <sup>43</sup>.  
259 <sup>44</sup> (Table 1 and 2). A total of 55 peptides had high sequence similarity with more than  
260 one category of TMPC (Table 1). SPPN-generated primordial peptides should be  
261 multifunctional peptides with low substrate specificity; thus, related mechanistically  
262 and evolutionarily. It has been suggested that any sufficiently complex set of  
263 polypeptides will inevitably derive reflexively autocatalytic sets of peptides and  
264 polypeptides <sup>45</sup>. In 1996, Lee et al. demonstrated that a rationally designed 32-residue  
265  $\alpha$ -helical peptide could act autocatalytically in templating its own synthesis by  
266 accelerating thioester-promoted amide-bond condensation in neutral aqueous  
267 solutions, indicating that the peptide has the possibility of self-replication <sup>46</sup>. Other  
268 studies have suggested that not only do some dipeptides and short peptide have  
269 catalytic activities, even a single proline can have aldolase activity <sup>47, 48, 49</sup>. Therefore,



270 the SPPN-generated primordial peptides could be complex enough to facilitate the  
271 emergence of reflexive autocatalysis, and thus make SPPN autocatalytic (Fig. 3).  
272 Moreover, the molecules of the autocatalytic SPPN might promote the synthesis of  
273 more complex molecules via a feedforward effect (Fig. 3), thus, ensuring autocatalytic  
274 SPPN self-promotion.

275 In our study, as expected, 22 peptides shared similarity with oxidoreductase, and  
276 11 shared similarity with ferredoxin-dependent proteins (Table 1). Four peptides  
277 shared similarity with thiosulfate sulfurtransferase as TMPC (Table 1). Thiosulfate  
278 sulfurtransferase (multifunctional rhodanese) catalyzes thiosulfate cleavage to sulfite.  
279 It has also been proposed to have an assimilatory role, using dithiol dihydrolipoate as  
280 the sulfur acceptor and acting as a sulfur insertase, involved in the formation of  
281 prosthetic groups in iron-sulfur proteins, such as ferredoxin<sup>50,51</sup>. On the other hand,  
282 the ferredoxin polypeptide can accelerate the assembly of its own iron-sulfur clusters  
283 *in vitro*<sup>51</sup>. This suggests that suitable conditions might have been present for the  
284 formation of primordial iron-sulfur proteins in SPPN if with the involvement of Fe-S  
285 minerals. In addition to TMPC, we found six peptides which shared similarity with  
286 sulfite/nitrite reductase (Table 1). Dissimilatory sulfite reductase (DsrAB) is closely  
287 related to the assimilatory enzyme present in all domains of life and is an enzyme of  
288 ancient origin<sup>52</sup>. In fact, the functional divergence of assimilatory and dissimilatory  
289 sulfite reductases precedes the divergence of the bacterial and archaeal domains<sup>19-21</sup>;  
290 therefore, it has been concluded that a primordial siroheme-containing sulfite  
291 reductase was most likely present in LUCA<sup>2</sup>. In the Sammo reaction scenario, the

292 generation of pyrrole might have provided the possibility of the emergence of a  
293 primordial siroheme-containing sulfite reductase, as pyrrole is the building block of  
294 siroheme. Similar to sulfite reductase, nitrite reductase is widely distributed in all  
295 domains of life; sulfite reductases from some sources can catalyze the reduction of  
296 both sulfite and nitrite<sup>22</sup>, suggesting that S and N biochemistry might have a common  
297 evolutionary origin derived from SPPN. Previous study reported a sulfate-fueled  
298 Sammox (also named as suramox) organism *Anammoxoglobus sulfate*, that belong to  
299 the phylum *Planctomycetes*<sup>53</sup>. In fact, so far, all anaerobic ammonium-oxidizing  
300 (anammox) organisms belong to a monophyletic group, deeply branching inside the  
301 phylum *Planctomycetes*<sup>54</sup>. Some of anammox *Planctomycetes* organisms have been  
302 suggested containing dissimilatory sulfite reductase<sup>55,56</sup> (Fig. 6), implied that some  
303 *Planctomycetes* organisms may use sulfurous species as the electron acceptor instead  
304 of nitrite during anaerobic ammonium oxidation process. Figure 6 shows that  
305 anammox organisms dissimilatory sulfite reductases, thiosulfate reductase (eg.  
306 sulfurtransferase or rhodanese), elemental sulfur reductase (eg. polysulfide reductase),  
307 and sulfate adenylyltransferase are taxonomically related to that of two typical  
308 sulfate/sulfite reducing bacterium, *Desulfurispora thermophila* and *Moorella*  
309 *thermoacetica*. It is of great significance to study whether anammox organisms have  
310 Sammox function. More interestingly, *Planctomycetes* are one of the deepest lines of  
311 divergence in the Bacteria domain, and might be transitional forms between the three  
312 domains of life<sup>57</sup>, implying a planctobacterial origin of neomura (eukaryotes,  
313 archaeobacteria)<sup>58</sup>. Thus confirm a very ancient role of Sammox metabolism.

314 Sammox-generated primordial peptides, similar to the enzymes of carbon  
315 fixation metabolism, including the reductive acetyl-CoA pathway and incomplete  
316 rTCA cycle, such as carbon monoxide dehydrogenase, formate acetyltransferase,  
317 acetyl-coenzyme A synthetase, acetoacetate-CoA ligase, succinate-CoA ligase, and  
318 fumarate hydratase, may have the feedforward effect for the formation of primordial  
319 enzymes to catalyze the reductive acetyl-CoA pathway and incomplete rTCA cycle.

320 The origin of homochirality of biological molecules (the use of only L-amino  
321 acids and only D-sugars) is an inevitable question in the process of explaining the  
322 origin of life. During the origin of life origin, proline induced rapid and  
323 stereoselective conversions during organic syntheses, resulting in pronounced peptide  
324 growth in an RNA-dependent fashion <sup>59</sup>. Results from previous studies show that  
325 cyclo-Pro-Pro, a cyclic dipeptide, can catalyze the chiral selection of reactions and is  
326 a peptide precursor <sup>60, 61, 62</sup>. Cyclo-Pro-Pro can be formed directly from unprotected  
327 proline in aqueous trimetaphosphate solution under mild conditions, with a yield up  
328 to 97%, whereas other amino acids were found to form proline-containing cyclic  
329 dipeptides with lower yield under the same conditions <sup>62</sup>. In this study, cyclo-Pro-Pro  
330 could be found in sulfite-, elemental sulfur-, and sulfate-fueled SPPNs (Fig. 7). We  
331 did not find cyclo-Pro-Pro in thiosulfate-fueled SPPN because it quickly returns to the  
332 peptide form (Fig. 7a). This result might suggest the emergence of homochirality in  
333 SPPN-generated peptides. In this study, the Sammox reaction scenario was a  
334 far-from-equilibrium environment; accordingly, symmetry breaking and the  
335 asymmetric amplification of SPPN-generated L-peptides might result from

336 autocatalytic far-from-equilibrium chiral amplification reactions, such as Soai  
337 autocatalytic reaction <sup>63</sup>. A very recent mechanistic study highlighted the crucial role  
338 of isotope chirality in symmetry breaking and asymmetric amplification via the Soai  
339 autocatalytic reaction <sup>64</sup> (Fig. 8).

340       The origin of the D-sugars in life becomes realizable under Sammox reaction  
341 conditions because of the emergence of L-amino acids. Breslow and Cheng found that  
342 D-glyceraldehyde, the basic unit from which all other D-sugars are built, synthesized  
343 by the reaction of formaldehyde with glycolaldehyde, is catalyzed under prebiotic  
344 conditions to D/L ratios greater than 1, to as much as 60/40, by L-serine, L-alanine,  
345 L-phenylalanine, L-valine, L-leucine, and L-glutamic acid <sup>66</sup>. Moreover, catalysis  
346 mixtures of natural D-sugars leads to enantio-enrichment of natural L-amino acid  
347 precursors <sup>66</sup>, thus showing the complementary nature of these two classes of  
348 molecules in the origin of biological homochirality. Further effort is necessary to  
349 explore the emergence of D-sugars in SPPN.

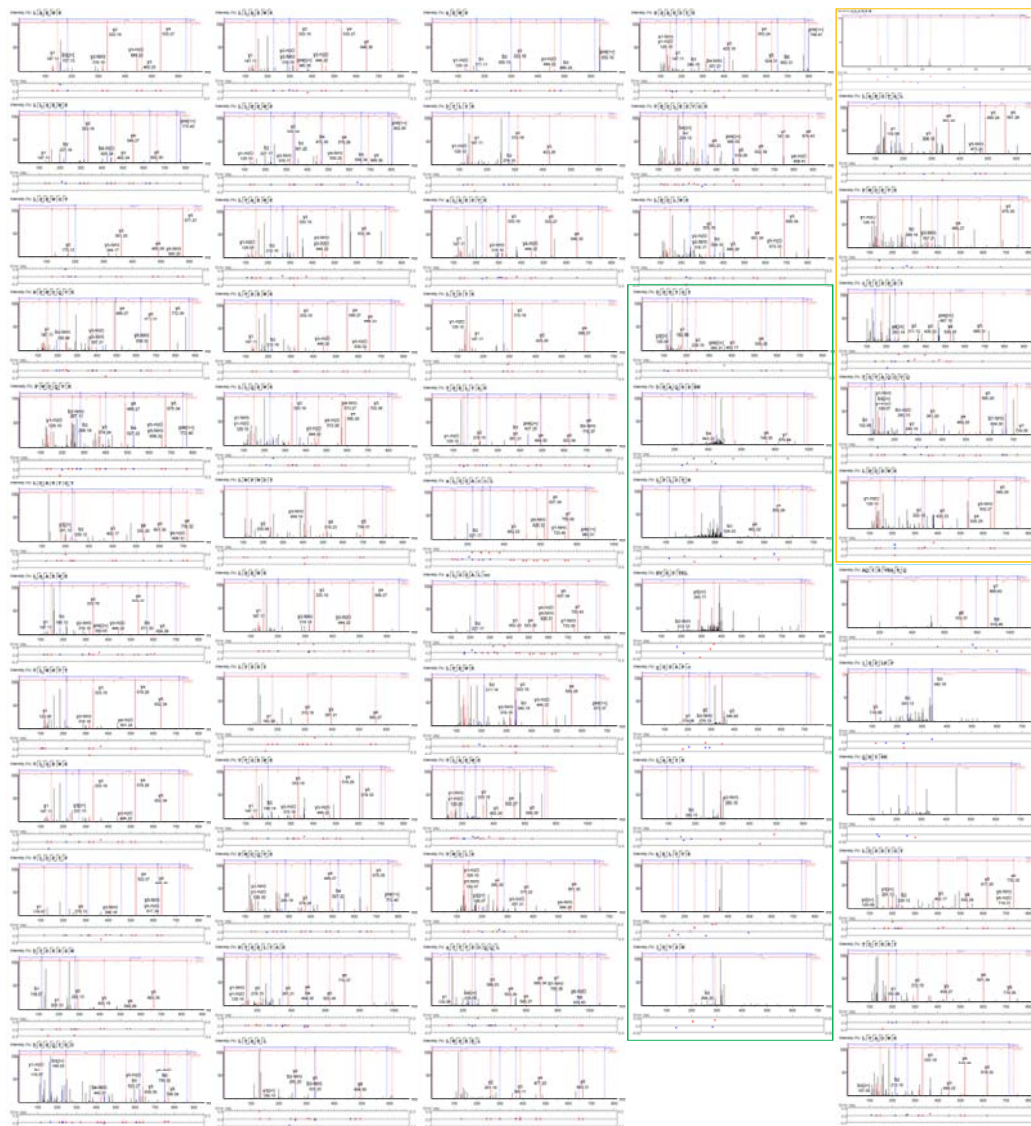

350

351 **Figure 5. MS/MS spectra of SPPN-generated peptides. The spectra of the eight**

352 **peptides from sulfite-fueled SPPN are shown in the green box. The spectra of the**

353 **six peptides from elemental sulfur-fueled SPPN are shown in the yellow box. The**

354 **spectra of the six peptides from sulfate-fueled SPPN are shown in the blue box.**

355 **The spectra of the other 37 peptides from thiosulfate-fueled SPPN are shown.**

356

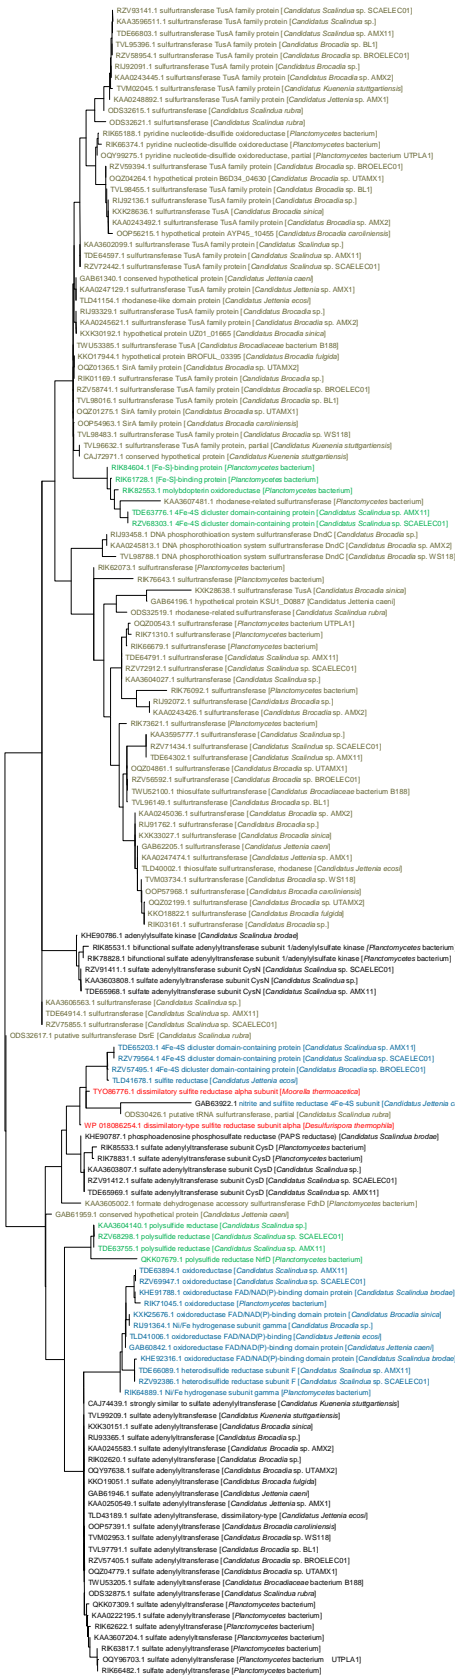

358 **Figure 6. Phylogenetic dendrogram based on the results of sequences**  
359 **comparisons. Phylogeny was inferred using the maximum-likelihood method.**  
360 **The percentages of replicate trees in which the associated taxa clustered together**  
361 **were obtained using bootstrap test with 1000 replications. Olive colour; putative**  
362 **thiosulfate reductase. Blue; putative sulfite reductase. Green; putative elemental**  
363 **sulfur reductase. Black; sulfate reduction related reductase. Dissimilatory sulfite**  
364 **reductase alpha subunit of *Moorella thermoacetica* and *Desulfurispora***  
365 ***thermophila* were included to show their position.**

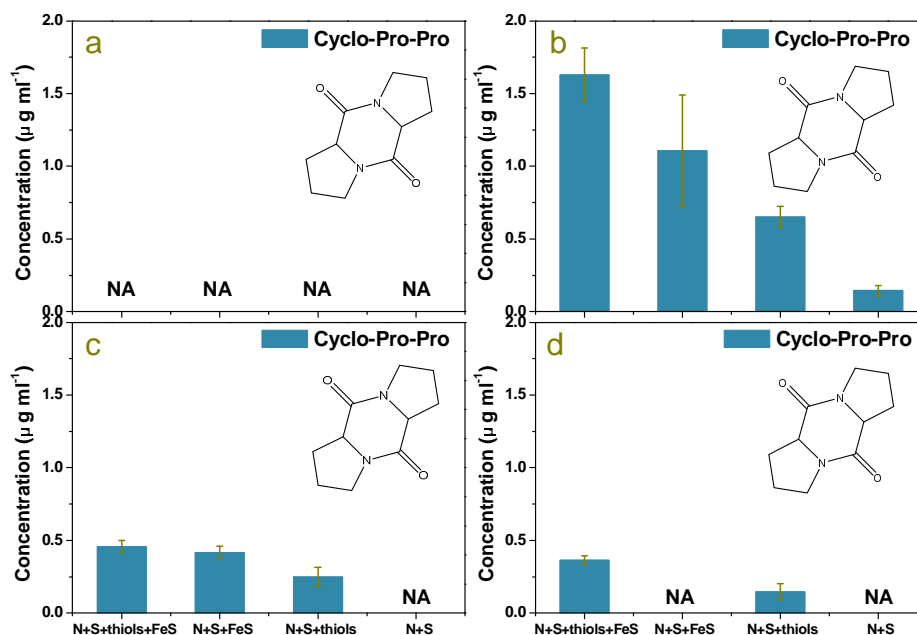

366  
367 **Figure 7. Cyclo-Pro-Pro generated from SPPN. Treatments were as follows (a,**  
368 **thiosulfate-fueled SPPN; b, sulfite-fueled SPPN; c, elemental sulfur-fueled SPPN;**  
369 **d, sulfate-fueled SPPN). The bar chart shows the concentrations of cyclo-Pro-Pro**  
370 **in each treatment group. Error bars represent standard deviations of three**  
371 **replicates. NA: Not detected.**

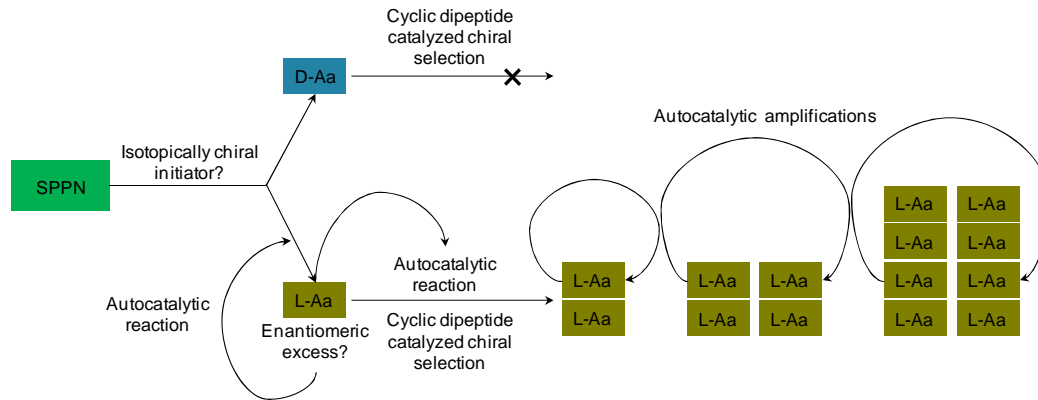

372

373 **Figure 8. Schematic diagram of asymmetric amplification of L-peptides in Soai**  
374 **autocatalysis initiated by isotopically chiral molecules in SPPN.**

375

## 376 CONCLUSIONS

377 In this study, we provided convincing evidence of the presence of SPPN—the  
378 combination of the acetyl-CoA pathway and incomplete rTCA cycle under mild  
379 hydrothermal conditions. SPPN consists of CO<sub>2</sub> fixation and sulfur and nitrogen  
380 transformation, which are derived from the simplest substances—CO<sub>2</sub>, sulfurous  
381 species (thiosulfate, sulfite, elemental sulfur, or sulfate), and ammonium to carboxylic  
382 acids, amino acids, pyrrole, and peptides in one geological setting. Peptides with 15  
383 proteinogenic amino acids shared high similarity with TMPC of LUCA, which might  
384 endow the SPPN with autocatalysis and homochirality. FeS minerals as proto-catalyst  
385 and thiols/thioesters as primordial energy currency enhanced the efficiency of SPPN.  
386 Sammo organisms might belong to the phylum of *Planctomycetes*, as one of the  
387 deepest lines of divergence in the Bacteria domain, and might be transitional forms  
388 between the three domains of life. We suggest that the proto-anabolic networks might  
389 arise from simultaneously coupling transformation of carbon, hydrogen, oxygen,



390 nitrogen, sulfur, and/or iron in the far-from-equilibrium environments. The coupling  
391 transformation of sulfur and nitrogen were vital for driving the origin of life in  
392 planetary systems.

393

## 394 **MATERIAL AND METHODS**

### 395 **Chemicals**

396 All reagents and organic solvents were purchased from Alfa Aesar, Ark Pharm,  
397 J&K Scientific, and Sigma-Aldrich and used without further purification, unless  
398 otherwise noted. Ultrapure water was prepared using the Millipore purification system  
399 (Billerica, MA, USA).

400

### 401 **General procedure for prebiotic Sammox-driven CO<sub>2</sub> fixation with or without** 402 **FeS catalysis and thiol/thioester promotion**

403 A total of 100 mL ultrapure water was transferred into 120 mL serum bottles and  
404 sealed with butyl rubber stoppers and aluminum crimp caps. The solution in the serum  
405 bottles was autoclaved and cooled at 25°C after being flushed with helium (He) gas  
406 (purity = 99.999%). Additional sulfur (thiosulfate, sulfite, elemental sulfur, and  
407 sulfate), ammonium (<sup>14</sup>NH<sub>4</sub>Cl), and bicarbonate were added into the serum bottles as  
408 the “Sammox reaction system.” The above-mentioned ingredients were aseptically  
409 added to the serum bottles as follows: sodium thiosulfate, sulfite, and sulfate (1 mL, 3  
410 mM final concentration), elemental sulfur (96 mg L<sup>-1</sup>, equivalent to 3 mM final  
411 concentration), ammonium solution (0.5 mL, 1 mM final concentration), bicarbonate

412 solution (1 mL, 20 mM final concentration), and 1 mM freshly precipitated FeS  
413 mineral were added into the serum bottles, as required. A solution of methanethiol  
414 (0.8 mM final concentration), used to synthesize thioesters, was added to the Sammox  
415 reaction system if necessary. The reaction systems were heated at 100°C in an oil bath  
416 in the dark for 24 h, maintained at 70°C in the dark for 24 h, and removed from the oil  
417 bath and allowed to cool to room temperature before analysis were conducted.

418 This study was performed using the following series of experiments:

419 (i) 3 mM thiosulfate/sulfite/elemental sulfur/sulfate + 1 mM NH<sub>4</sub>Cl + 20 mM  
420 HCO<sub>3</sub><sup>-</sup>,

421 (ii) 3 mM thiosulfate/sulfite/elemental sulfur/sulfate + 1 mM NH<sub>4</sub>Cl + 20 mM  
422 HCO<sub>3</sub><sup>-</sup> + 1 mM FeS,

423 (iii) 3 mM thiosulfate/sulfite/elemental sulfur/sulfate + 1 mM NH<sub>4</sub>Cl + 20 mM  
424 HCO<sub>3</sub><sup>-</sup> + 0.8 mM methanethiol,

425 (iv) 3 mM thiosulfate/sulfite/elemental sulfur/sulfate + 1 mM NH<sub>4</sub>Cl + 20 mM  
426 HCO<sub>3</sub><sup>-</sup> + 1 mM FeS + 0.8 mM methanethiol,

427 (v) 3 mM thiosulfate/sulfite/elemental sulfur/sulfate + 20 mM HCO<sub>3</sub><sup>-</sup>,

428 (vi) 1 mM NH<sub>4</sub>Cl + 20 mM HCO<sub>3</sub><sup>-</sup>, and

429 (vii) ultrapure water

430

431 **Experimental procedure for verifying the Sammox-driven combination of**  
432 **non-enzymatic reductive acetyl-CoA pathway and incomplete rTCA cycle**

433 We designed this experimental set-up to verify whether the Sammox-driven

434 reductive acetyl-CoA pathway could go into the Sammox-driven incomplete rTCA  
435 cycle. The experimental procedure was the same as that noted above. Pyruvate (1 mM  
436 final concentration) was added into the Sammox reaction system as the substrate.  
437 Serum bottles were heated at 100°C in a water bath in the dark for 24 h, maintained at  
438 70°C in the dark for another 24 h, and allowed to cool to room temperature before  
439 analysis.

440 This study was performed using the following series of experiments:

- 441 (i) 3 mM thiosulfate/sulfite/elemental sulfur/sulfate + 1 mM NH<sub>4</sub>Cl + 20 mM  
442 HCO<sub>3</sub><sup>-</sup> + 1 mM pyruvate + 1 mM FeS + 0.8 mM methanethiol,  
443 (ii) 3 mM thiosulfate/sulfite/elemental sulfur/sulfate + 1 mM NH<sub>4</sub>Cl + 20 mM  
444 HCO<sub>3</sub><sup>-</sup> + 1 mM FeS + 1 mM pyruvate,  
445 (iii) 3 mM thiosulfate/sulfite/elemental sulfur/sulfate + 1 mM NH<sub>4</sub>Cl + 20 mM  
446 HCO<sub>3</sub><sup>-</sup> + 1 mM pyruvate,  
447 (iv) 3 mM thiosulfate/sulfite/elemental sulfur/sulfate + 20 mM HCO<sub>3</sub><sup>-</sup> + 1 mM  
448 pyruvate,  
449 (v) 1 mM NH<sub>4</sub>Cl + 20 mM HCO<sub>3</sub><sup>-</sup> + 1 mM pyruvate, and  
450 (vi) Ultrapure water + 1 mM pyruvate.

451

452 **General procedure for verifying the Sammox-driven prebiotic incomplete rTCA**  
453 **cycle**

454 To further prove the feasibility of the Sammox-driven prebiotic incomplete  
455 rTCA cycle, we used oxaloacetate, malate, fumarate, succinate, and α-ketoglutarate (1

456 mM final concentration), as substrates in Sammox systems. Serum bottles were  
457 heated at 100°C in a water bath in the dark for 24 h, maintained at 70°C in the dark  
458 for another 24 h, and allowed to cool to room temperature before analysis. This study  
459 was performed using the following series of experiments:

460 (i) 3 mM thiosulfate/sulfite/elemental sulfur/sulfate + 1 mM NH<sub>4</sub>Cl + 20 mM  
461 HCO<sub>3</sub><sup>-</sup> + 1 mM oxaloacetate/malate/fumarate/succinate/α-ketoglutarate.

462

### 463 **Sampling analytical methods**

#### 464 *Ion chromatographic analysis of the products of the Sammox-driven prebiotic* 465 *reductive acetyl-CoA pathway*

466 To determine formate and acetate, 0.5 mL of each sample was filtered through  
467 0.22-μm pores to remove particulates that could interfere with ion chromatography  
468 (IC). The IC system comprised an ICS-5000<sup>+</sup> SP pump (Thermo Fisher Scientific Inc.  
469 Sunnyvale, CA, USA), an ICS-5000<sup>+</sup> DC column oven, and a DC-5 electrochemical  
470 detector <sup>67</sup>. The Dionex Ionpac AS11-HC column was used for IC. The operating  
471 conditions were an eluent of 30 mM KOH at a flow rate of 1 mL min<sup>-1</sup>.

#### 472 *Derivatization procedure and identification of carboxylic acids of the* 473 *Sammox-driven prebiotic incomplete rTCA by GC-MS*

474 For optimal GC-MS resolution, the carboxylic acids were converted to ethyl  
475 esters using a mixture of ethanol/ethyl chloroformate (EtOH/ECF). The carboxylic  
476 acids were derivatized into esters as published before <sup>68</sup>. The products of this reaction  
477 were identified by comparing the mass spectra and retention times against

478 analogously derivatized authentic samples. ECF derivatization was preferred for small  
479 molecule substrates (pyruvate, lactate, malate, fumarate, succinate,  $\alpha$ -ketoglutarate,  
480 and  $\alpha$ -hydroxyglutarate). To confirm a Sammox-driven prebiotic complete rTCA  
481 cycle, C<sub>5</sub> and C<sub>6</sub> carboxylic acids of complete rTCA, such as *cis*-aconitate,  
482 tricarballylate, iso-citrate, and citrate, were converted to methyl esters, using a  
483 mixture of MeOH/MCF and following the same procedure as that used for ECF  
484 derivatization<sup>68</sup>.

485 GC-MS analysis was conducted on a 7890B GC System, connected to an MSD  
486 block 5977A using the Agilent high-resolution GC column as follows: PN  
487 19091S-433, HP-5MS, 28 m × 0.25 mm, 0.25  $\mu$ m, SN USN 462366H. Samples were  
488 prepared in 200  $\mu$ L (sample volume) ethyl acetate and were analyzed on a splitless 1  
489  $\mu$ L injection volume with an injection port temperature of 250°C. The column oven  
490 temperature protocol was as follows: 60°C for 1 min, ramped at 30°C min<sup>-1</sup> to 310°C  
491 with a 3-min hold, and a total running time of 12.33 min. The mass spectrometer was  
492 turned on after 3 min and was operated in the electron ionization mode with a  
493 quadrupole temperature of 150°C. Data were acquired in the full-scan mode (50–500).  
494 Hydrogen (99.999 % purity) was used as the carrier gas at a constant flow rate of 1.5  
495 mL min<sup>-1</sup>.

#### 496 ***Liquid chromatography-MS method to determine polypyrrole***

497 For qualitative detection of polypyrrole, the Waters ACQUITY UPLC system  
498 with an online coupled SYNAPT G2 mass spectrometer Q-TOF was used. Samples  
499 were separated using the ACQUITY UPLC HSS T3 column (1.8  $\mu$ m; 2.1 × 100 mm;

500 column temperature, 30°C). Solvent A contained 2.5% methanol, 0.2% formic acid in  
501 UPLC-grade water, and solvent B was 97.5% UPLC-grade water with 0.2% formic  
502 acid. Injection of 2 µL sample into the column at 0.2 mL min<sup>-1</sup> was followed by  
503 gradient elution. The mass spectrometric, qualitative detection of polypyrrole was  
504 conducted in resolution mode. Polypyrrole was identified by comparing the mass  
505 spectra and retention times against pure commercially available polypyrrole (100 µL  
506 mL<sup>-1</sup>) that was heated at 100°C in a water bath in the dark for 24 h and maintained at  
507 70°C in the dark for another 24 h. Tandem MS data were analyzed using MassLynx v  
508 4.1.

#### 509 ***BCA protein assay***

510 The BCA protein assay was performed according to the instructions of the  
511 commercial kit. The detection solution was prepared using the BCA solution and the  
512 Cu<sup>2+</sup> solution at a ratio of 50:1. Thereafter, standard BSA solutions were added into  
513 each hole from 0–20 µL and the volume in each hole was made up to 20 µL with PBS.  
514 Thereafter, 20 µL sample solutions, followed by 200 µL of the detection solution were  
515 added to each hole. The microplate was incubated at 37°C in the analyzer for 20 min.  
516 The absorbance of the colorimetric solution was measured at 560 nm using a  
517 microplate reader (Infinite 200 PRO, TECAN).

#### 518 ***Nano LC-MS/MS analysis***

519 The sample solution was reduced using 10 mM DTT at 56°C for 1 h and  
520 alkylated with 20 mM IAA at room temperature, in dark for 1 h. Thereafter, the  
521 extracted peptides were lyophilized to near dryness and resuspended in 2–20 µL of

522 0.1% formic acid before LC-MS/MS analysis. LC-MS/MS analysis was performed on  
523 the UltiMate 3000 system (Thermo Fisher Scientific, USA) coupled to a Q  
524 Exactive™ Hybrid Quadrupole-Orbitrap™ Mass Spectrometer (Thermo Fisher  
525 Scientific, USA). The chromatographic separation of peptides was achieved using a  
526 nanocolumn—a 150  $\mu\text{m}$   $\times$  15 cm column—made in-house and packed with the  
527 reversed-phase ReproSil-Pur C18-AQ resin (1.9  $\mu\text{m}$ , 100 Å, Dr. Maisch GmbH,  
528 Germany). A binary mobile phase and gradient were used at a flow rate of 600 nL  
529  $\text{min}^{-1}$ , directed into the mass spectrometer. Mobile phase A was 0.1% formic acid in  
530 water, and mobile phase B was 0.1% formic acid in acetonitrile. LC linear gradient:  
531 from 6–9% B for 5 min, from 9–50% B for 45 min, from 50–95% B for 2 min, and  
532 from 95–95% B for 4 min. The injection volume was 5  $\mu\text{L}$ . MS parameters were set  
533 as follows: resolution at 70,000; AGC target at 3e6; maximum IT at 60 ms; number of  
534 scan ranges at 1; scan range at 300 to 1,400 m/z; and spectrum data type was set to  
535 profile. MS/MS parameters were set as follows: resolution was set at 17,500; AGC  
536 target at 5e4; maximum IT at 80 ms; loop count at 20; MSX count at 1; TopN at 20;  
537 isolation window at 3 m/z; isolation offset at 0.0 m/z; scan range at 200 to 2,000 m/z;  
538 fixed first mass at 100 m/z; stepped NCE at 27; spectrum data type at profile;  
539 intensity threshold at 3.1e4; and dynamic exclusion at 15 s. The raw MS files were  
540 analyzed and searched against target protein databases, based on the species of the  
541 samples using Peaks studio and MaxQuant (1.6.2.10), combined with manual  
542 comparison in the UniProt and NCBI databases. The parameters were set as follows:  
543 protein modifications were carbamidomethylation (C) (fixed), oxidation (M)

544 (variable), and acetylation (N-term) (variable); enzyme was set to unspecific; the  
545 maximum missed cleavages were set to 2; the precursor ion mass tolerance was set to  
546 20 ppm, and MS/MS tolerance was 20 ppm. Only peptides identified with high  
547 confidence were chosen for downstream protein identification analysis.

548 For the analysis of amino acids content, reaction solution of SPPN was  
549 condensed 20 times, followed by acid hydrolysis. A total of 10  $\mu\text{L}$  acid hydrolysate  
550 was mixed with 30  $\mu\text{L}$  acetonitrile, vortexed for 1 min, and centrifuged for 5 min at  
551 13,200  $\text{r min}^{-1}$  at 4°C. Thereafter, 10  $\mu\text{L}$  of supernatant was added to 10  $\mu\text{L}$  water and  
552 vortexed for 1 min. Subsequently, 10  $\mu\text{L}$  of the mixture was added to 70  $\mu\text{L}$  of borate  
553 buffer (from AccQTag kit) and vortexed for 1 min. A total of 20  $\mu\text{L}$  of AccQ Tag  
554 reagent (from AccQTag kit) was added to the sample, vortexed for 1 min, and the  
555 sample was allowed to stand at ambient temperature for 1 min. Finally, the solution  
556 was heated for 10 min at 55°C, and centrifuged for 2 min at 13,200  $\text{r min}^{-1}$  and 4°C.

557 Multiple reaction monitoring analysis was performed by using a Xevo TQ-S  
558 mass spectrometer. All experiments were performed in positive electrospray  
559 ionization (ESI+) mode. The ion source temperature and capillary voltage were kept  
560 constant and set to 150°C and 2 kV, respectively. The cone gas flow rate was 150 L  
561  $\text{h}^{-1}$  and desolvation temperature was 600°C. The desolvation gas flow was 1,000 bar.  
562 The system was controlled using the analysis software.

### 563 ***High performance liquid chromatography analysis of cyclo-Pro-Pro***

564 The Phenomenex Luna CN 5u column, which is a non-porous analytical column,  
565 packed with 5  $\mu\text{m}$  particles (250 mm  $\times$  4.6 mm inner diameter, Phenomenex Inc, USA)



566 was used. Mobile phase A contained 0.05 M sodium acetate, while solvent B was 20%  
567 methanol–60% acetonitrile–20% ultrapure water. Gradient profiling involved a linear  
568 gradient elution from A/B (95:5) to A/B (52:48) for 39 min, a linear gradient elution  
569 from A/B (52:48) to A/B (0:100) for 1 min, a linear gradient elution from A/B (0:100)  
570 for 5 min, a linear gradient elution from A/B (0:100) to A/B (95:5) for 1 min, and A/B  
571 (95:5), maintained for 4 min. The flow rates of the mobile phase and the column  
572 temperature were set at 1 mL min<sup>-1</sup> and 35°C, respectively. The detection wave was  
573 UV-220 nm. Cyclo-Pro-Pro was identified by comparing the retention times against  
574 pure commercially available cyclo-Pro-Pro.

575 **Phylogenetic analyses of dissimilatory sulfite reductase, thiosulfate reductase,**  
576 **elemental sulfur reductase, and sulfate adenylyltransferase**

577 Proteins sequences and the taxonomy of species classification information will  
578 be downloaded from NCBI GenBank database (<https://www.ncbi.nlm.nih.gov>). The  
579 evolutionary history was inferred by using the Maximum Likelihood method based on  
580 the JTT matrix-based model<sup>69</sup>. The tree with the highest log likelihood (-3868.8161)  
581 is shown. Initial tree for the heuristic search was obtained automatically as follows.  
582 When the number of common sites was < 100 or less than one fourth of the total  
583 number of sites, the maximum parsimony method was used; otherwise BIONJ method  
584 with MCL distance matrix was used. The tree is drawn to scale, with branch lengths  
585 measured in the number of substitutions per site. The analysis involved 150 amino  
586 acid sequences. Evolutionary analyses were conducted in MEGA5<sup>70</sup>.

587

588 **ACKNOWLEDGMENTS**

589 This research was financially supported by the National Natural Science Foundation of  
590 China (General Program No. 41571240).

591 **AUTHOR CONTRIBUTIONS**

592 Peng Bao conceived the study, designed and carried out the experiment, and wrote the  
593 manuscript. Guo-Xiang Li carried out experiments and analysis. Peng Bao,  
594 Guo-Xiang Li, and Ke-Qing Xiao contributed to interpreting the data. Jun-Yi Zhao,  
595 Kun Wu, Juan Wang, Xiao-Yu Jia, Hui-En Zhang, Yu-Qin He, and Hu Li carried out  
596 sample analysis.

597 **COMPETING INTERESTS**

598 The authors declare no competing interests.

599

600 **REFERENCES**

- 601 (1) Falkowski, P. G.; Fenchel, T.; Delong, E. F. The Microbial Engines that Drive  
602 Earth's Biogeochemical Cycles. *Science*. **2008**, *320*, 1034–1039.
- 603 (2) Sousa, F. L.; Thiergart, T.; Landan, G.; Nelson-Sathi, S.; Pereira, I. A. C.; Allen, J.  
604 F.; Lane, N.; Martin, W. F. Early Bioenergetic Evolution. *Philos. Trans. R. Soc.*  
605 *B-Biol. Sci.* **2013**, *368*.
- 606 (3) Moore, E. K.; Jelen, B. I.; Giovannelli, D.; Raanan, H.; Falkowski, P. G. Metal  
607 Availability and the Expanding Network of Microbial Metabolisms in the  
608 Archaean Eon. *Nat. Geosci.* **2017**, *10*, 629–636.
- 609 (4) Weiss, M. C.; Sousa, F. L.; Mrnjavac, N.; Neukirchen, S.; Roettger, M.;

- 610 Nelson-Sathi, S.; Martin, W. F. The Physiology and Habitat of the Last Universal  
611 Common Ancestor. *Nat. Microbiol.* **2016**, *1*.
- 612 (5) Ljungdah, L.; Irion, E.; Wood, H. G. Total Synthesis of Acetate from CO<sub>2</sub>. I.  
613 Co-Methylcobyric Acid and Co-(methyl)-5-Methoxybenzimidazolylcobamide as  
614 Intermediates with *Clostridium thermoaceticum*. *Biochemistry* **1965**, *4*,  
615 2771–2780.
- 616 (6) Kelley, D. S.; Karson, J. A.; Fruh-Green, G. L.; Yoerger, D. R.; Shank, T. M.;  
617 Butterfield, D. A.; Hayes, J. M.; Schrenk, M. O.; Olson, E. J.; et al. A  
618 Serpentinite-Hosted Ecosystem: the Lost City Hydrothermal Field. *Science* **2005**,  
619 *307*, 1428–1434.
- 620 (7) Lane, N.; Martin, W. F. The Origin of Membrane Bioenergetics. *Cell* **2012**, *151*,  
621 1406–1416.
- 622 (8) Wächtershäuser, G. Pyrite Formation, the First Energy Source for Life: a  
623 Hypothesis. *Syst. Appl. Microbiol.* **1988**, *10*, 207–210.
- 624 (9) Wächtershäuser, G. Evolution of the First Metabolic Cycles. *Proc. Natl. Acad. Sci.*  
625 *U. S. A.* **1990**, *1*, 200–204.
- 626 (10) De Duve, C. Blueprint for a Cell: the Nature and Origin of Life. Neil Patterson,  
627 **1991**, 275.
- 628 (11) Evans, M. C. W.; Buchanan, B. B.; Arnon, D. I. A New Ferredoxin-Dependent  
629 Carbon Reduction Cycle in a Photosynthetic Bacterium. *Proc. Natl. Acad. Sci. U.*  
630 *S. A.* **1966**, *55*, 928–934.
- 631 (12) Smith, E.; Morowitz, H. J. Universality in Intermediary Metabolism. *Proc. Natl.*

- 632 *Acad. Sci. U. S. A.* **2004**, *101*, 13168–13173.
- 633 (13) Martin, W.; Russell, M. J. On the Origin of Biochemistry at an Alkaline  
634 Hydrothermal Vent. *Philos. Trans. R. Soc. B-Biol. Sci.* **2007**, *362*, 1887–1925.
- 635 (14) Orgel, L. E. The Implausibility of Metabolic Cycles on the Prebiotic Earth. *PLoS.*  
636 *Biol.* **2008**, *6*, 5–13.
- 637 (15) Braakman, R.; Smith, E. The Emergence and Early Evolution of Biological  
638 Carbon-Fixation. *PLoS Comput. Biol.* **2012**, *8*.
- 639 (16) Camprubi, E.; Jordan, S. F.; Vasiliadou, R.; Lane, N. Iron Catalysis at the Origin  
640 of Life. *IUBMB Life* **2017**, *69*, 373–381.
- 641 (17) Russell, M. J.; Hall, A. J.; Mellersh, A. R. Natural and Laboratory Simulated  
642 Thermal Geochemical Processes. *Springer*, **2003**; pp 325–388.
- 643 (18) Goldford, J. E.; Hartman, H.; Smith, T. F.; Segre, D. Remnants of an Ancient  
644 Metabolism without Phosphate. *Cell* **2017**, *168*, 1126–1134.
- 645 (19) Crane, B. R.; Siegel, L. M.; Getzoff, E. D. Sulfite Reductase Structure at 1.6  
646 Angstrom—Evolution and Catalysis for Reduction of Inorganic Anions. *Science*  
647 **1995**, *270*, 59–67.
- 648 (20) Molitor, M.; Dahl, C.; Molitor, I.; Schafer, U.; Speich, N.; Huber, R.; Deutzmann,  
649 R.; Truper, H. G. A Dissimilatory Sirohaem-Sulfite-Reductase-Type Protein  
650 from the Hyperthermophilic Archaeon *Pyrobaculum islandicum*, *Microbiology*  
651 **1998**, *144*, 529–541.
- 652 (21) Dhillon, A.; Goswami, S.; Riley, M.; Teske, A.; Sogin, M. Domain Evolution  
653 and Functional Diversification of Sulfite Reductases. *Astrobiology* **2005**, *5*,

654 18–29.

655 (22) Crane, B. R.; Getzoff, E. D. The Relationship between Structure and Function for  
656 the Sulfite Reductases. *Curr. Opin. Struct. Biol.* **1996**, *6*, 744–756.

657 (23) Fdz-Polanco, F.; Fdz-Polanco, M.; Fernandez, N.; Uruena, M. A.; Garcia, P. A.;  
658 Villaverde, S. Combining the Biological Nitrogen and Sulfur Cycles in  
659 Anaerobic Conditions. *Water Sci. Technol.* **2001**, *44*, 77–84.

660 (24) Amend, J. P.; Rogers, K. L.; Shock, E. L.; Gurrieri, S.; Inguaggiato, S. Energetics  
661 of Chemolithoautotrophy in the Hydrothermal System of Vulcano Island,  
662 Southern Italy. *Geobiology* **2003**, *1*, 37–58.

663 (25) Schrum, H. N.; Spivack, A. J.; Kastner, M.; D'Hondt, S. Sulfate-Reducing  
664 Ammonium Oxidation: A Thermodynamically Feasible Metabolic Pathway in  
665 Subseafloor Sediment. *Geology* **2009**, *37*, 939–942.

666 (26) Rios-Del Toro, E. E.; Valenzuela, E. I.; Lopez-Lozano, N. E.; Cortes-Martinez, M.  
667 G.; Sanchez-Rodriguez, M. A.; Calvario-Martinez, O.; Sanchez-Carrillo, S.;  
668 Cervantes, F. J. Anaerobic Ammonium Oxidation Linked to Sulfate and Ferric  
669 Iron Reduction Fuels Nitrogen Loss in Marine Sediments. *Biodegradation* **2018**,  
670 *29*, 429–442.

671 (27) Amend, J. P.; Shock, E. L. Energetics of Overall Metabolic Reactions of  
672 Thermophilic and Hyperthermophilic Archaea and Bacteria. *FEMS Microbiol*  
673 *Rev* **2001**, *25*, 175–243.

674 (28) Philippot, P.; Zuilen, M. V.; Lepot, K.; Thomazo, C.; Farquhar, J.; Van  
675 Kranendonk, M. J. Early Archaean Microorganisms Preferred Elemental Sulfur,

- 676 not Sulfate. *Science* **2007**, *317*, 1534–1537.
- 677 (29) Li, Y.; Keppler, H. Nitrogen Speciation in Mantle and Crustal Fluids. *Geochim.*  
678 *Cosmochim. Acta.* **2014**, *129*, 13–32.
- 679 (30) Mikhail, S.; Sverjensky, D. A. Nitrogen Speciation in upper Mantle Fluids and  
680 the Origin of Earth's Nitrogen-Rich Atmosphere. *Nat. Geosci.* **2014**, *7*, 816–819.
- 681 (31) Sleep, N. H. The Hadean-Archaean Environment. *Cold Spring Harbor Perspect.*  
682 *Biol.* **2010**, *2*.
- 683 (32) Crowe, S. A.; Paris, G.; Katsev, S.; Jones, C.; Kim, S. T.; Zerkle, A. L.;  
684 Nomosatryo, S.; Fowle, D. A.; Adkins, J. F.; et al. Sulfate was a Trace  
685 Constituent of Archean Seawater. *Science* **2014**, *346*, 735–739.
- 686 (33) Eigen, M. Self-Organization of Matter and the Evolution of Biological  
687 Macromolecules. *Naturwissenschaften* **1971**, *58*, 465–562.
- 688 (34) Eck, R. V.; Dayhoff, M. O. Evolution of the Structure of Ferredoxin Based on  
689 Living Relics of Primitive Amino Acid Sequences. *Science* **1966**, *152*, 363–366.
- 690 (35) Jorgensen, B. B. A Thiosulfate Shunt in the Sulfur Cycle of Marine-Sediments.  
691 *Science* **1990**, *249*.
- 692 (36) Lohmayer, R.; Kappler, A.; Losekann-Behrens, T.; Planer-Friedrich, B. Sulfur  
693 Species as Redox Partners and Electron Shuttles for Ferrihydrite Reduction by  
694 *Sulfurospirillum deleyianum*. *Appl. Environ. Microbiol.* **2014**, *80*, 3141–3149.
- 695 (37) Heinen, W.; Lauwers, A. M. Organic Sulfur Compounds Resulting from the  
696 Interaction of Iron Sulfide, Hydrogen Sulfide and Carbon Dioxide in an  
697 Anaerobic Aqueous Environment. *Orig. Life Evol. Biosph.* **1996**, *26*, 131–150.

- 698 (38) Milucka, J.; Ferdelman, T. G.; Polerecky, L.; Franzke, D.; Wegener, G.; Schmid,  
699 M.; Lieberwirth, I.; Wagner, M.; Widdel, F.; Kuypers, M. M. M. Zero-Valent  
700 Sulphur is a Key Intermediate in Marine Methane Oxidation. *Nature* **2012**, *491*,  
701 541–546.
- 702 (39) Hartman, H. Speculations on the Origin and Evolution of Metabolism. *J. Mol.*  
703 *Evol.* **1975**, *4*, 359–370.
- 704 (40) Wong, J. T. F. Coevolution Theory of Genetic Code at Age Thirty. *Bioessays*.  
705 **2005**, *27*, 416–425.
- 706 (41) Trifonov, E. N.; Volkovich, Z.; Frenkel, Z. M. Multiple Levels of Meaning in  
707 DNA Sequences, and One More. *Ann. NY Acad. Sci.* **2012**, *1267*, 35–38.
- 708 (42) Davis, B. K. Molecular Evolution Before the Origin of Species. *Prog. Biophys.*  
709 *Mol. Biol.* **2002**, *79*, 77–133.
- 710 (43) Koonin, E. V. Comparative Genomics, Minimal Gene-Sets and the Last  
711 Universal Common Ancestor, *Nat. Rev. Microbiol.* **2003**, *1*, 127–136.
- 712 (44) Ouzounis, C. A.; Kunin, V.; Darzentas, N.; Goldovsky, L. A Minimal Estimate  
713 for the Gene Content of the Last Universal Common Ancestor-Exobiology From  
714 a Terrestrial Perspective. *Res. Microbiol.* **2006**, *157*(1):57–68.
- 715 (45) Kauffman, S. A. Autocatalytic Sets of Proteins. *J. theor. Biol.* **1986**, *119*, 1–24.
- 716 (46) Lee, D. H.; Granja, J. R.; Martinez, J. A.; Severin, K.; Ghadiri, M. R. A  
717 Self-replicating Peptide. *Nature* **1996**, *382*, 525–528.
- 718 (47) Sakthivel, K.; Notz, W.; Bui, T.; Barbas, C. F., III. Amino Acid Catalyzed Direct  
719 Asymmetric Aldol Reactions: A Bioorganic Approach to Catalytic Asymmetric

- 720 Carbon-Carbon Bond Formation. *J. Am. Chem. Soc.* **2001**, *123*, 5260.
- 721 (48) Eilizabeth, R. J.; Miller, S. J. Amino Acids and Peptides As Asymmetric  
722 Organocatalysis. *Tetrahedron.* **2002**, *58* (13): 2481–2495.
- 723 (49) Kroiss, D.; Ashkenasy, G.; Braunschweig, A. B.; Tuttle, T.; Ulijn, R. V. Catalyst:  
724 can systems chemistry unravel the mysteries of the chemical origins of life?  
725 *Chem.* **2019**, *5*, 1917–1920.
- 726 (50) Lefaou, A.; Rajagopal, B. S.; Daniels, L.; Fauque, G. Thiosulfate, polythionates  
727 and elemental sulfur assimilation and reduction in the bacterial world. *FEMS*  
728 *Microbiol Lett.* **1990**, *75*, 351–82.
- 729 (51) Bonomi, F.; Werth, M. T.; Kurtz, D. M. Assembly of [FenSn(SR)]<sub>2</sub>-(n=2, 4) in  
730 aqueous media from iron salts, thiols and sulfur, sulfide, thiosulfide plus  
731 rhodanase. *Inorg Chem.* **1985**, *24*, 4331–5.
- 732 (52) Grein, F.; Ramos, A. R.; Venceslau, S. S.; Pereira, I. A. C. Unifying Concepts in  
733 Anaerobic Respiration: Insights from Dissimilatory Sulfur Metabolism.  
734 *BBA-Bioenerg.* **2013**, *1827*, 145–160.
- 735 (53) Liu, S.; Yang, F.; Gong, Z.; Meng, F.; Chen, H.; Xue, Y.; Furukawa, K.  
736 Application of anaerobic ammonium-oxidizing consortium to achieve  
737 completely autotrophic ammonium and sulfate removal. *Bioresour. Technol.*  
738 **2008**, *99* (15), 6817–6825.
- 739 (54) van Niftrik, L.; Jetten, M. S. M. Anaerobic ammonium-oxidizing bacteria:  
740 unique microorganisms with exceptional properties. *Microbiol. Mol. Biol. R.*  
741 **2012**, *76*, 585–596.



- 742 (55) Kartal, B.; Keltjens, J. T. Anammox biochemistry: a tale of heme *c* proteins.  
743 *Trends. Biochem. Sci.* **2016**, *41*(12), 998–1011.
- 744 (56) Anantharaman, K.; Hausmann, B.; Jungbluth, S. P.; Kantor, R. S.; Lavy, A.;  
745 Warren, L. A.; Rappé, M. S.; Pester, M.; Loy, A.; Thomas, B. C.; Banfield, J. F.  
746 Expanded diversity of microbial groups that shape the dissimilatory sulfur cycle.  
747 *ISME J.* **2018**, *12*, 1715–1728.
- 748 (57) Reynaud, E. G.; Devos, D. P. Transitional forms between the three domains of  
749 life and evolutionary implications. *Proc. Biol. Sci.* **2011**, *278*, 3321–3328.
- 750 (58) Cavalier-Smith, T.; Chao, E. E. Multidomain ribosomal protein trees and the  
751 planctobacterial origin of neomura (eukaryotes, archaeobacteria). *Protoplasma*.  
752 **2020**, *257*, 621–753.
- 753 (59) Griesser, H.; Bechthold, M.; Tremmel, P.; Kervio, E.; Richert, C. Amino  
754 acid-Specific, Ribonucleotide-Promoted Peptide Formation in the Absence of  
755 Enzymes. *Angew. Chem. Int. Ed.* **2017**, *56*, 1224–1228.
- 756 (60) Borthwick, A. D. 2, 5-Diketopiperazines: Synthesis, Reactions, Medicinal  
757 Chemistry, and Bioactive Natural Products. *Chemical. reviews.* **2012**, *112*,  
758 3641–3716.
- 759 (61) Danger, G.; Plasson, R.; Pascal, R. Pathways For the Formation and Evolution of  
760 Peptides In Prebiotic Environments. *Chem. Soc. Rev.* **2012**, *41*, 5416–5429.
- 761 (62) Ying, J.; Lin, R.; Xu, P.; Wu, Y.; Liu, Y.; Zhao, Y. Prebiotic Formation of Cyclic  
762 Dipeptides Under Potentially Early Earth Conditions. *Sci. Rep.* **2018**, *8*, 936.
- 763 (63) Soai, K.; Shibata, T.; Morioka, H.; Choji, K. Asymmetric Autocatalysis and

764 Amplification of Enantiomeric Excess of a Chiral Molecule. *Nature*. **1995**, 378,  
765 767–768.

766 (64) Hawbaker, N.; Blackmond, D. G. Rationalization of Asymmetric Amplification  
767 via Autocatalysis Triggered by Isotopically Chiral Molecules. *ACS Cent. Sci.*  
768 **2018**, 4, 776–780.

769 (65) Breslow, R.; Cheng, Z. L. L-Amino acids Catalyze the Formation of An Excess  
770 of D-glyceraldehyde, and Thus of Other D Sugars, Under Credible Prebiotic  
771 Conditions. *Proc. Natl. Acad. Sci. U. S. A.* **2010**, 107, 5723–5725.

772 (66) Wagner, A. J.; Zubarev, D. Y.; Aspuru-Guzik, A.; Blackmond, D. G. Chiral  
773 Sugars Drive Enantioenrichment in Prebiotic Amino Acid Synthesis. *ACS Cent.*  
774 *Sci.* **2017**, 3, 322–328.

775 (67) Bao, P.; Li, G. X. Sulfur-Driven Iron Reduction Coupled to Anaerobic  
776 Ammonium Oxidation. *Environ. Sci. Technol.* **2017**, 51, 6691–6698.

777 (68) Muchowska, K. B.; Varma, S. J.; Chevallot-Beroux, E.; Lethuillier-Karl, L.; Li,  
778 G.; Moran, J. Metals Promote Sequences of the Reverse Krebs Cycle. *Nat. Ecol.*  
779 *Evol.* **2017**, 1, 1716–1721.

780 (69) Jones, D. T.; Taylor, W. R.; Thornton. J. M. The rapid generation of mutation  
781 data matrices from protein sequences. *Comput. Appl. Biosci.* **1992**, 8, 275–282.

782 (70) Tamura K, Peterson D, Peterson N, Stecher G, Nei M, Kumar S. MEGA5:  
783 molecular evolutionary genetics analysis using maximum likelihood, evolutionary  
784 distance, and maximum parsimony methods. *Mol. Biol. Evol.* **2011**, 28, 2731–9.

785

786 **Table 1. Sammox-driven prebiotic proto-anabolic networks (SPPN)-generated**  
 787 **peptides compared within the UniProt and NCBI databases. Thios, peptide from**  
 788 **thiosulfate-fueled SPPN; Sulfi, peptide from sulfite-fueled SPPN; ES, peptide**  
 789 **from elemental sulfur-fueled SPPN; Sulfa, peptide from sulfate-fueled SPPN.**  
 790 **Summary of proteins identified from the truly minimal protein content (TMPC)**  
 791 **of the last universal common ancestor (LUCA), iron-sulfur protein (in blue),**  
 792 **proposed Sammox metabolic protein (in blue), including function of proteins,**  
 793 **and organismal source.**

| Peptide ID | Denovo peptide    | Function, and organismal source of matched protein                                                                                                                                                                                                                                                                                                                                                                                                                                                                                                                                                                                                                                                                                                                                                                         |
|------------|-------------------|----------------------------------------------------------------------------------------------------------------------------------------------------------------------------------------------------------------------------------------------------------------------------------------------------------------------------------------------------------------------------------------------------------------------------------------------------------------------------------------------------------------------------------------------------------------------------------------------------------------------------------------------------------------------------------------------------------------------------------------------------------------------------------------------------------------------------|
| Thios-1    | LAEWK             | Putative thiosulfate sulfurtransferase, <i>Methanothermobacter thermoautotrophicus</i> /4Fe-4S ferredoxin, Deltaproteobacteria bacterium/acyl-CoA synthetase, <i>Kandelimiobium roseum</i> /Acetyl-CoA acetyltransferase, <i>Weissella oryzae</i> /ATP-dependent DNA helicase II subunit 1, <i>Chaetomium globosum</i> /Acetolactate synthase large subunit, <i>Bacillus subtilis</i> /Glycerol-3-phosphate dehydrogenase [NAD(P)+], <i>Corynebacterium glutamicum</i> /Lysine-tRNA ligase, <i>Pseudarthrobacter</i> sp. AG30/Branched-chain-amino-acid aminotransferase-like protein 1, <i>Arabidopsis thaliana</i> /Histidine ammonia-lyase, <i>Caulobacter vibrioides</i> /Phenylalanine-tRNA ligase alpha subunit, <i>Roseiflexus</i> sp. RS-1/Flavin-dependent thymidylate synthase, <i>Thermococcus kodakarensis</i> |
| Thios-2    | LLSEWK            | Glutamine-dependent NAD(+) synthetase, <i>Walleimia ichthyophaga</i> /thioester reductase family protein, <i>Photorhabdus luminescens</i> /Mediator of RNA polymerase II transcription subunit 16, <i>Aedes aegypti</i> (Yellow fever mosquito) /Diaminopimelate decarboxylase, <i>Aureibacillus halotolerans</i> /Sulfite reductase, ferredoxin dependent, filamentous cyanobacterium/Thiamine-monophosphate kinase, <i>Candidatus Omnitrophica</i> bacterium/DNA helicase, <i>Candidatus Rokubacteria</i> bacterium/DNA mismatch repair protein MutS, <i>Desulfovibrio</i> sp. An276/CTP synthase, <i>Candidatus Poseidoniales</i> archaeon                                                                                                                                                                              |
| Thios-3    | LSEWGV            | Oxidored_nitro domain-containing protein, Firmicutes bacterium/NADH-quinone oxidoreductase subunit 1, <i>Rhodospseudomonas palustris</i> /Cysteine-tRNA ligase, <i>Methylocella silvestris</i> /CTP synthase, <i>Chloroflexi</i> bacterium/3-isopropylmalate dehydratase large subunit, <i>Fictibacillus phosphorivorans</i> /Orotate phosphoribosyltransferase, <i>Bacillus campisalis</i> /Probable cysteine desulfurase, <i>Chlamydia trachomatis</i>                                                                                                                                                                                                                                                                                                                                                                   |
| Thios-4    | NPWDQVK           | Serine/threonine protein kinase, putative, <i>Talaromyces stipitatus</i> /Amidase domain-containing protein, <i>Chloroflexi</i> bacterium/ABC transporter, <i>Verrucomicrobiales</i> bacterium/long-chain fatty acid-CoA ligase, <i>Corynebacterium</i> sp. CNJ-954 /phosphoribosylformylglycinamidase synthase, <i>Candidatus Accumulibacter phosphatis</i>                                                                                                                                                                                                                                                                                                                                                                                                                                                               |
| Thios-5    | PWDQVK            | Acetyl-coenzyme A synthetase, <i>Methanomicrobiales</i> archaeon/Cluster: His-tRNA synthetase (Fragment), <i>Teinoptila guttella</i> /Cluster: NAD(P)+ FAD-dependent oxidoreductase, bacterium M00.F/Cluster: Translation elongation factor G, Firmicutes bacterium/Cluster: Amino acid permease family protein, <i>Acinetobacter nosocomialis</i> /Methyltransf_2 domain-containing protein, <i>Hypholoma sublateritium</i> /Aminotransferase, Bacteroidetes bacterium                                                                                                                                                                                                                                                                                                                                                    |
| Thios-6    | LDAKYGY           | Magnesium and cobalt transporter CoA, <i>Coprococcus</i> sp. HPP0048/Peptidase, <i>Staphylococcus</i> .OJ82                                                                                                                                                                                                                                                                                                                                                                                                                                                                                                                                                                                                                                                                                                                |
| Thios-7    | LAAEWK            | Adenylosuccinate lyase, <i>Candidatus Moduliflexus flocculans</i> /Acetyl-CoA synthetase, <i>Prevotella</i> sp. kh1p2/Carbon monoxide dehydrogenase, <i>Clostridium formicaceticum</i> /NADH-quinone oxidoreductase subunit N, <i>Acidobacteria</i> bacterium/Shikimate dehydrogenase (NADP(+)) aroE, <i>Paenibacillus rhizosphaerae</i> /Lysine-tRNA ligase, <i>Candidatus Campbellbacteria</i> bacterium/DNA helicase, <i>Baekduia soli</i>                                                                                                                                                                                                                                                                                                                                                                              |
| Thios-8    | VLWNVV;<br>VLGEWK | Acetoacetate-CoA ligase, Deltaproteobacteria bacterium/dehydratase, <i>Alikangiella marina</i> /Multifunctional fusion protein [Includes: ADP-dependent (S)-NAD(P)H-hydrate dehydratase, (ADP-dependent NAD(P)HX dehydratase); NAD(P)H-hydrate epimerase, (NAD(P)HX epimerase)], Bacteroidales bacterium/Aldehyde ferredoxin oxidoreductase, <i>Candidatus Bathyarchaeota</i> archaeon B24-2/Branched-chain amino acid ABC transporter permease, <i>Streptomyces</i> sp. FR-008/Acetylornithine aminotransferase, <i>Koribacter versatilis</i> /Carbamoyl-phosphate synthase large chain, <i>Chryseobacterium</i> sp. 1.059                                                                                                                                                                                                |
| Thios-9    | VLDKYP            | Aspartate-tRNA ligase, cytoplasmic, <i>Mus musculus</i> (Mouse)/Adenylosuccinate lyase, <i>Vibrio</i> bacterium/ <i>magnilacihabitans</i> /Peptidase T, <i>Chitinophaga cymbidii</i> /ABC transporter, ATP-binding protein, <i>Collinsella stercoris</i> /Cysteine-tRNA ligase, <i>Olsenella</i> sp. oral taxon/Sulfotransferase family protein, <i>Gemmatimonadetes</i> bacterium/Sulfate adenylyltransferase, <i>Paenimaribius caenipelagi</i>                                                                                                                                                                                                                                                                                                                                                                           |
| Thios-10   | DYDKKSW           | Formate dehydrogenase-N subunit alpha fdnG, <i>Paracoccus</i> sp. JC/phosphate ABC transporter permease PstA, <i>Comamonas testosteroni</i>                                                                                                                                                                                                                                                                                                                                                                                                                                                                                                                                                                                                                                                                                |
| Thios-11   | DKSQYKD           | Methyltransf_25 domain-containing protein, <i>Gammaproteobacteria</i> bacterium/Thiol oxidoreductase, Alphaproteobacteria bacterium/3-oxoacyl-[acyl-carrier-protein] synthase, <i>Chiloscyllium punctatum</i> /Electron transfer flavoprotein alpha, <i>Odoribacter splanchnicus</i> /beta-subunit, <i>Pelosinus fermentans</i> B4/Aspartyl-tRNA synthetase, <i>Trichoderma harzianum</i>                                                                                                                                                                                                                                                                                                                                                                                                                                  |
| Thios-12   | LLAEWK            | Flavin-dependent thymidylate synthase, <i>Thermococcus kodakarensis</i> /Indolepyruvate ferredoxin oxidoreductase family protein, <i>Luteimonas</i> sp. H23/N-acetyltransferase domain-containing protein, <i>Saccharopolyspora rectivirgula</i> /Alcohol dehydrogenase, <i>Drosophila erecta</i> /ATPase, <i>Actinomyces oris</i> /DNA polymerase III subunit alpha, <i>Cobetia crustatorum</i> /Chemotaxis protein methyltransferase, <i>Vibrio alginolyticus</i>                                                                                                                                                                                                                                                                                                                                                        |
| Thios-13   | LLNEWK            | Nitrogen assimilation regulatory protein NtrX, <i>Wohlfahrtiimonas chitiniclastica</i> /Esterase/lipase/thioesterase family protein, hydrothermal vent metagenome/NAD(P)H-quinone oxidoreductase subunit 2, <i>Frullania nodulosa</i> /Peptidase_MA_2 domain-containing protein, <i>Novibacillus thermophilus</i> /Phenylalanine-tRNA ligase alpha subunit, <i>Marinithermus hydrothermalis</i> /DNA mismatch repair protein MutS, <i>Desulfovibrio vulgaris</i>                                                                                                                                                                                                                                                                                                                                                           |

|          |                                                                    |                                                                                                                                                                                                                                                                                                                                                                                                                                                                                                                                                                                                                                                                                                                                                                                                                                                                                                                                                                                                                                                                                                                                                                      |
|----------|--------------------------------------------------------------------|----------------------------------------------------------------------------------------------------------------------------------------------------------------------------------------------------------------------------------------------------------------------------------------------------------------------------------------------------------------------------------------------------------------------------------------------------------------------------------------------------------------------------------------------------------------------------------------------------------------------------------------------------------------------------------------------------------------------------------------------------------------------------------------------------------------------------------------------------------------------------------------------------------------------------------------------------------------------------------------------------------------------------------------------------------------------------------------------------------------------------------------------------------------------|
| Thios-14 | LVAEWK                                                             | FAD/NAD(P)-binding oxidoreductase family protein, <i>Artemisia annua</i> /Adenylosuccinate lyase, <i>Capnocytophaga</i> sp. oral taxon/Leucine-tRNA ligase, <i>Pseudoflavonifactor</i> sp. An176/Acetolactate synthase, <i>Rhizobiales</i> bacterium 24-66-13/Peptidase_M23 domain-containing protein, <i>Marinobacter flavimaris</i>                                                                                                                                                                                                                                                                                                                                                                                                                                                                                                                                                                                                                                                                                                                                                                                                                                |
| Thios-15 | LVSEWK                                                             | Thiol: disulfide interchange protein, <i>Ottowia</i> sp./FMN-dependent NADH-azoreductase, <i>Erwinia persicina</i> /DNA polymerase, <i>Candidatus Thermochlorobacteriaceae</i> bacterium GBChIB/DNA helicase, candidate division TM6 bacterium/Lysine-tRNA ligase, <i>Amnibacterium</i> sp. M8JJ-5/Adenylosuccinate lyase, <i>Thermaurantomonas aggregans</i> /Glycine dehydrogenase (decarboxylating), <i>Rhodococcus</i> sp. LHW51113/Anthranilate phosphoribosyltransferase, <i>Magnetospirillum gryphiswaldense</i>                                                                                                                                                                                                                                                                                                                                                                                                                                                                                                                                                                                                                                              |
| Thios-16 | LLQEWK                                                             | Orotate phosphoribosyltransferase, <i>Enterococcus faecalis</i> /Imidazole glycerol phosphate synthase subunit HisH, <i>Exiguobacterium</i> sp. AB2/Aspartate aminotransferase, <i>Smittium megazygosporum</i> /Oxidoreductase, aldo/keto reductase family, <i>Pseudomonas yamanorum</i> /Methyltransferase, <i>Cyanobacteria</i> bacterium UBA11370/Orotate phosphoribosyltransferase, <i>Enterococcus faecalis</i> /Acetolactate synthase, <i>Chloroflexi</i> bacterium/Glycerol kinase, <i>Sphingobacterium</i> sp. SS19/DNA mismatch repair protein MutS, <i>Spirochaetes</i> bacterium/Argininosuccinate lyase, uncultured archaeon                                                                                                                                                                                                                                                                                                                                                                                                                                                                                                                             |
| Thios-17 | LWPWDT                                                             | SDR family NAD(P)-dependent oxidoreductase, <i>Micromonospora</i> sp. PPF5-17/Hist_deacetyl domain-containing protein, <i>Coccomyxa subellipsoidea</i> strain C-169                                                                                                                                                                                                                                                                                                                                                                                                                                                                                                                                                                                                                                                                                                                                                                                                                                                                                                                                                                                                  |
| Thios-18 | LSEWK                                                              | 4Fe-4S ferredoxin-type domain-containing protein, marine sediment metagenome/DNA ligase, <i>Yarrowia lipolytica</i> /N-acetyl-gamma-glutamyl-phosphate reductase, <i>Bacillus anthracis</i>                                                                                                                                                                                                                                                                                                                                                                                                                                                                                                                                                                                                                                                                                                                                                                                                                                                                                                                                                                          |
| Thios-19 | LYSKY                                                              | Aminomethyltransferase, <i>Prochlorococcus marinus</i> subsp. <i>pastoris</i> /NADH-quinone oxidoreductase subunit J, <i>Bacillus thuringiensis</i> subsp. <i>Darmstadtensis</i> /Ferredoxin-dependent glutamate synthase, <i>Antithamnion</i> sp. (Red alga)/NADH-ubiquinone oxidoreductase chain 1, <i>Citrullus lanatus</i> (Watermelon) (Citrullus vulgaris)/NADH-quinone oxidoreductase subunit J, <i>Bacillus cereus</i> Rock4-2/Pyruvate dehydrogenase E1 component subunit beta, <i>Echinacea purpurea</i> witches'-broom phytoplasma/Thiol-disulfide oxidoreductase, <i>Halobacillus salinus</i> /Ferrochelatase, (Heme synthase) (Protoheme ferro-lyase) hemH, <i>Brevibacillus nitrificans</i> /Citrate synthase, <i>Eubacterium</i> sp./ATP-dependent RNA helicase RhlE, <i>Marinobacter</i> sp. C1S70/DNA helicase, <i>Thermovibrio guaymasensis</i>                                                                                                                                                                                                                                                                                                    |
| Thios-20 | VVGEWK                                                             | Dihydroloipoamide acetyltransferase component of pyruvate dehydrogenase complex, <i>Anaerotrignum neopropionicum</i> /Sulfotransferase_1 domain-containing protein, <i>Actinobacteria</i> bacterium/Dihydroloipoamide acetyltransferase component of pyruvate dehydrogenase complex, <i>Anaerotrignum neopropionicum</i> /Succinate-CoA ligase [ADP-forming] subunit beta, <i>Roseovarius indicus</i> /Isoleucine-tRNA ligase, <i>Parabacteroides distasonis</i> /ATPase, <i>Pseudobutyrvibrio</i> sp. AR14/Electron transfer flavoprotein, alpha subunit, <i>Caballeronia sordidicola</i> /ATP-dependent RNA helicase, <i>Erinaceus europaeus</i> /DNA topoisomerase 1, <i>Flavobacteriales</i> bacterium                                                                                                                                                                                                                                                                                                                                                                                                                                                           |
| Thios-21 | PWDQVK                                                             | Acetyl-coenzyme A synthetase, <i>Methanomicrobiales</i> archaeon HGW-Methanomicrobiales-6/Amino acid permease family protein, <i>Acinetobacter baumannii</i> 1571545/His-tRNA synthetase, <i>Teinoptila guttella</i>                                                                                                                                                                                                                                                                                                                                                                                                                                                                                                                                                                                                                                                                                                                                                                                                                                                                                                                                                 |
| Thios-22 | NYSELYAK                                                           | dicarboxylate transporter, <i>DcpI</i> subunit, <i>Enterococcus</i> sp. 9E7_DIV0242                                                                                                                                                                                                                                                                                                                                                                                                                                                                                                                                                                                                                                                                                                                                                                                                                                                                                                                                                                                                                                                                                  |
| Thios-23 | LYAKL                                                              | Chorismate synthase, <i>Helicobacter pylori</i> strain G27/DNA-directed RNA polymerase subunit beta, <i>Deinococcus geothermalis</i> strain DSM 11300/Proline-tRNA ligase, <i>Ehrlichia ruminantium</i> strain Gardel                                                                                                                                                                                                                                                                                                                                                                                                                                                                                                                                                                                                                                                                                                                                                                                                                                                                                                                                                |
| Thios-24 | K(+42.01)EWK                                                       | NADH-quinone oxidoreductase subunit N, <i>Azobacteroides pseudotriconymphae genomovar</i> . CFP2/Periplasmic nitrate reductase, <i>Nautilia profundicola</i> strain BAA-1463/30S ribosomal protein S15, <i>Sulfurisphaera tokodaii</i> strain 16993/Putative aldehyde dehydrogenase-like protein, <i>Schizosaccharomyces pombe</i> strain 972                                                                                                                                                                                                                                                                                                                                                                                                                                                                                                                                                                                                                                                                                                                                                                                                                        |
| Thios-25 | DYLYK                                                              | Argininosuccinate synthase, <i>Clostridium botulinum</i> strain 19397/Glucose-1-phosphate adenyltransferase, <i>Haemophilus influenzae</i> strain ATCC 51907/Dipeptidyl peptidase 4, <i>Felis catus</i> (Cat) (Felis silvestris catus)/DNA-directed RNA polymerase subunit beta', RNAP subunit beta', <i>Ureaplasma parvum</i> serovar 3 strain ATCC 700970/Oligoendopeptidase, <i>Lactobacillus casei</i> /Carbon monoxide dehydrogenase, <i>Desulfopila</i> sp. IMCC35006/Aspartate-tRNA ligase, <i>Firmicutes</i> bacterium                                                                                                                                                                                                                                                                                                                                                                                                                                                                                                                                                                                                                                       |
| Thios-26 | A(+42.01)LAESVK                                                    | Ferrochelatase, (Heme synthase) (Protoheme ferro-lyase) hemH, <i>Acidithiobacillus</i> sp. SH/Alcohol dehydrogenase, <i>Scaptomyza albovittata</i> (Fruit fly)/Peptidyl-prolyl cis-trans isomerase, <i>Aliivibrio fischeri</i> strain MJ11/Peptidyl-prolyl cis-trans isomerase, <i>Aliivibrio salmonicida</i> strain LFI1238                                                                                                                                                                                                                                                                                                                                                                                                                                                                                                                                                                                                                                                                                                                                                                                                                                         |
| Thios-27 | LYDYK                                                              | Argininosuccinate synthase, <i>Bifidobacterium longum</i> strain NCC 2705/ATP-dependent helicase/nuclease subunit A, <i>Enterococcus faecalis</i> strain ATCC 700802                                                                                                                                                                                                                                                                                                                                                                                                                                                                                                                                                                                                                                                                                                                                                                                                                                                                                                                                                                                                 |
| Thios-28 | YSELYAK                                                            | Peptidase_M3 domain-containing protein, <i>Clostridiales</i> bacterium/Acetyl-coenzyme A synthetase, <i>Rhodoblastus acidophilus</i> /Oxidoreductase, 2OG-Fe(II) oxygenase family, <i>Penicillium digitatum</i> strain Pd1                                                                                                                                                                                                                                                                                                                                                                                                                                                                                                                                                                                                                                                                                                                                                                                                                                                                                                                                           |
| Thios-29 | A(+42.01)LGGCA(+57.02)C(+57.02)L; A(+42.01)LGGALC(+57.02)C(+57.02) | Radical SAM protein (iron-sulfur cluster binding), <i>Azospirillum</i> sp. TSO22-1/DsrB, partial, uncultured bacterium (Marine deep biosphere microbial communities assemble in near-surface sediments)/amino acid permease, <i>Planctomycetes</i> bacterium Poly41/NADH-quinone oxidoreductase subunit M, <i>Lysobacter lycopersici</i> /DsrB, partial, uncultured bacterium/respiratory nitrate reductase subunit gamma, <i>Streptomyces</i> sp. LHW50302                                                                                                                                                                                                                                                                                                                                                                                                                                                                                                                                                                                                                                                                                                          |
| Thios-30 | LPEWK                                                              | 2Fe-2S ferredoxin-type domain-containing protein, <i>Actinobacteria</i> bacterium/Fumarate hydratase class II, <i>Streptomyces</i> sp. CB01580/N-acetyltransferase domain-containing protein, <i>Treponema</i> sp./Glucose-6-phosphate isomerase, <i>Candida albicans</i> strain SC5314/Glutamate-tRNA ligase, <i>Cupriavidus pinatubonensis</i> strain JMP/Na_H_Exchange domain-containing protein, <i>Streptomyces klenkii</i> /Probable glycine dehydrogenase (decarboxylating) subunit 1, <i>Thermus thermophilus</i> strain SG0.5JP17-16/Succinyl-CoA synthetase, beta subunit, <i>Chloracidobacterium thermophilum</i> strain B/Fumarate hydratase class II, <i>Thiocapsa rosea</i> /Sulfurtransferase, <i>Bacillus</i> bacterium/Ferredoxin-NADP reductase, <i>Arthrobacter crystallopoietes</i> /Adenylosuccinate lyase, <i>Pasteurellaceae</i> bacterium/Heme chaperone HemW, <i>Rhodobacteriales</i> bacterium/Thiosulfate sulfurtransferase SseA, <i>Flavobacteriales</i> bacterium ALC-1/Sulfite reductase, ferredoxin dependen, <i>Oscillatoriales cyanobacterium</i> USR001/ArsR family transcriptional regulator, <i>Mesorhizobium</i> sp. SEMIA 3007 |
| Thios-31 | VLAEWK                                                             | Bifunctional ligase/repressor BirA (Biotin-[acetyl-CoA-carboxylase] ligase, <i>Desulfococcus palustris</i> /Ferredoxin-nitrite reductase, <i>Synechococcus</i> sp. Lanier/Branched-chain-amino-acid aminotransferase-like protein 1, <i>Arabidopsis thaliana</i> /Acetyl-CoA acetyltransferase, <i>Mycobicacterium tokaiense</i> /Ammonium transporter, <i>Acetobacter acetii</i>                                                                                                                                                                                                                                                                                                                                                                                                                                                                                                                                                                                                                                                                                                                                                                                    |
| Thios-32 | VWDLK                                                              | DNA ligase, <i>Aquifex aeolicus</i> strain VF5/Oxidoreductase, <i>Stenotrophomonas maltophilia</i> /SDR family oxidoreductase, <i>Stenotrophomonas maltophilia</i> /NAD(P)-dependent oxidoreductase, <i>Variovorax</i> sp. T529/Methyltransferase, <i>Leptospira haakeii</i> /ABC transporter permease, <i>Anaerobacillus arsenicisenensis</i> /NAD(P)-dependent dehydrogenase (Short-subunit alcohol dehydrogenase family), <i>Stenotrophomonas</i> sp. AG209/DNA helicase, <i>Hungateiclostridium straminisolvens</i> /Phenylalanine-tRNA ligase, <i>Gemmatimonadetes</i> bacterium/Thiamine-monophosphate kinase, <i>Blastocatella</i> bacterium                                                                                                                                                                                                                                                                                                                                                                                                                                                                                                                  |
| Thios-33 | A(+42.01)YTVSDQQL                                                  | acetyl-CoA synthetase-like protein, <i>Wolffporia cocos</i> MD-104 SS10/aminopeptidase N, <i>Idiomarina seosinensis</i> /peptidylprolyl isomerase, <i>Novimethylophilus kurashikiensis</i> /aminopeptidase N, <i>Idiomarina seosinensis</i>                                                                                                                                                                                                                                                                                                                                                                                                                                                                                                                                                                                                                                                                                                                                                                                                                                                                                                                          |
| Thios-34 | LWSEEL                                                             | Fe-S oxidoreductase, <i>Marinobacteriales</i> bacterium/Formate acetyltransferase, <i>Escherichia coli</i> DEC6A/PFL-like enzyme TdcE (Keto-acid formate acetyltransferase) (Keto-acid formate-lyase) (Ketobutyrate formate-lyase, KFL, EC 2.3.1.-) (Pyruvate formate-lyase, PFL, EC 2.3.1.54) , <i>Escherichia coli</i> strain K12                                                                                                                                                                                                                                                                                                                                                                                                                                                                                                                                                                                                                                                                                                                                                                                                                                  |
| Thios-35 | SSAKDYK                                                            | ArsR family transcriptional regulator, <i>Virgibacillus soli</i> /Rhodanese-related sulfurtransferase, <i>Bacillus simplex</i>                                                                                                                                                                                                                                                                                                                                                                                                                                                                                                                                                                                                                                                                                                                                                                                                                                                                                                                                                                                                                                       |
| Thios-36 | VEDLESVKG                                                          | SDR family NAD(P)-dependent oxidoreductase, <i>Salinigranum</i> sp. YJ-53/methyltransferase, <i>Leptotrichia</i> sp. oral taxon 847                                                                                                                                                                                                                                                                                                                                                                                                                                                                                                                                                                                                                                                                                                                                                                                                                                                                                                                                                                                                                                  |
| Thios-37 | LEDLWK                                                             | Methionine-tRNA ligase, <i>Sulfurospirillum</i> sp. UBA12182/Thioredoxin domain-containing protein, <i>Clastoptera</i>                                                                                                                                                                                                                                                                                                                                                                                                                                                                                                                                                                                                                                                                                                                                                                                                                                                                                                                                                                                                                                               |

|         |                            |                                                                                                                                                                                                                                                                                                                                                                                                                                                                                                                                                                                                                                                                                                                                                                                                                                                                                                                                                                                                                                                                                |
|---------|----------------------------|--------------------------------------------------------------------------------------------------------------------------------------------------------------------------------------------------------------------------------------------------------------------------------------------------------------------------------------------------------------------------------------------------------------------------------------------------------------------------------------------------------------------------------------------------------------------------------------------------------------------------------------------------------------------------------------------------------------------------------------------------------------------------------------------------------------------------------------------------------------------------------------------------------------------------------------------------------------------------------------------------------------------------------------------------------------------------------|
|         |                            | <i>arizonana</i> /Adenylosuccinate synthetase, AMPSase, <i>Gemella</i> sp. WT2a/Threonine--tRNA ligase, <i>Candidatus Aegiribacteria</i> bacterium MLS_C/Diaminopimelate decarboxylase, <i>Idiomarina salinarum</i>                                                                                                                                                                                                                                                                                                                                                                                                                                                                                                                                                                                                                                                                                                                                                                                                                                                            |
| Sulfi-1 | DSKYGY                     | Methionine aminopeptidase, <i>Acetivibrio ethanolignens</i> /Peptidylprolyl isomerase, <i>Plasmodium ovale</i>                                                                                                                                                                                                                                                                                                                                                                                                                                                                                                                                                                                                                                                                                                                                                                                                                                                                                                                                                                 |
| Sulfi-2 | DKAQKSEW                   | Sulfurtransferase, bacterium GenBank: TNE68199.1/ferrochelatase, <i>Microbulbifer aggregans</i> /acyl-CoA dehydrogenase, <i>Marivita</i> sp. XM-24bin2                                                                                                                                                                                                                                                                                                                                                                                                                                                                                                                                                                                                                                                                                                                                                                                                                                                                                                                         |
| Sulfi-3 | LPLDTN                     | Dihydroliipoamide dehydrogenase, <i>Brevibacterium antiquum</i> /Mannose-1-phosphate guanylyltransferase (GDP), <i>Phyllobacterium sophorae</i> /mannose-6-phosphate isomerase, type 2, <i>Phyllobacterium</i> sp. OV277/Putative oxidoreductase ferredoxin-type protein, hydrothermal vent metagenome/Oxidoreductase, short chain dehydrogenase/reductase family, hydrothermal vent metagenome/Aspartate--tRNA ligase, <i>Moranela endobia</i> strain PCIT/NAD(P)-dependent oxidoreductase, <i>Burkholderia</i> sp. AU18528/Glycerol-3-phosphate dehydrogenase, <i>Helicobacter pylori</i> /(Fe-S)-binding protein, <i>Helicobacter pylori</i> /ATP-dependent DNA helicase II subunit 2, <i>Hyalomma excavatum</i> /Long-chain-fatty-acid--CoA ligase, <i>Pseudomonas syringae</i> pv. aptata 1/Peptidase_M28 domain-containing protein, <i>Dibothriocephalus latus</i>                                                                                                                                                                                                       |
| Sulfi-4 | EVKPTKL                    | Lysine--tRNA ligase, <i>Saccharicrinis carchari</i> /Fructose-1,6-bisphosphatase class I, <i>Rhodovulum</i> sp. PH10/30S ribosomal protein S9, <i>Candidatus Peregrinibacteria</i> bacterium CG1/Ferrochelatase hemH, <i>Marivivens niveibacter</i> /dehydratase family protein, <i>Actinobacteria</i> bacterium TMED270/Alanine--tRNA ligase, <i>Euryarchaeota</i> archaeon                                                                                                                                                                                                                                                                                                                                                                                                                                                                                                                                                                                                                                                                                                   |
| Sulfi-5 | Y(+42.01)SSAP<br>C(+57.02) | Acetyl-coenzyme A carboxylase carboxyl transferase subunit beta, <i>Anthoceros angustus</i> (Hornwort) (Anthoceros formosae)/Acetyl-coenzyme A carboxylase carboxyl transferase subunit beta, <i>Deparia lancea</i> (False spleenwort) (Asplenium lanceum)/Na(+)/H(+) antiporter NhaA, <i>Komagataeibacter sucrofermentans</i> /Formate dehydrogenase, <i>Methanoculleus bourgensis</i>                                                                                                                                                                                                                                                                                                                                                                                                                                                                                                                                                                                                                                                                                        |
| Sulfi-6 | LAKYK                      | 30S ribosomal protein S4, <i>Sulfolobus acidocaldarius</i> /Peptidyl-prolyl cis-trans isomerase D, <i>Candida glabrata</i> /Nitrogenase molybdenum-iron protein alpha chain, nifD, <i>Rhodobacter capsulatus</i> /Adenylosuccinate synthetase, AMPSase, <i>Komagataella phaffii</i> /Aspartate carbamoyltransferase, <i>Buchnera aphidicola</i> subsp. <i>Schizaphis graminum</i> strain Sg/Sulfate adenylyltransferase, <i>Debaryomyces hansenii</i> /Aminotransferase, <i>Oscillibacter</i> sp./Aspartokinase, <i>Chryseobacterium</i> sp. 36-9                                                                                                                                                                                                                                                                                                                                                                                                                                                                                                                              |
| Sulfi-7 | K(+42.01)ELVV<br>K         | Nitric oxide reductase transcriptional regulator NorR, <i>Providencia heimbachae</i> /Nitrite reductase (cytochrome; ammonia-forming), <i>Moorea producens</i> /4Fe-4S ferredoxin, <i>Nitrospirae</i> bacterium GWD2/NADPH-dependent 2,4-dienyl-CoA reductase, sulfur reductase, <i>Paramaledivibacter caminithermalis</i> /Nitric oxide reductase transcriptional regulator NorR, <i>Proteus mirabilis</i> /Iron-sulfur cluster repair di-iron protein, <i>Niastella koreensis</i> /50S ribosomal protein L13, <i>Acholeplasma laidlawii</i> strain PG-8A/Thioredoxin domain-containing protein, marine sediment metagenome/Pyruvate kinase, <i>Lactobacillus parabrevis</i> /4Fe-4S ferredoxin, <i>Nitrospirae</i> bacterium GWD2/Peptidyl-prolyl cis-trans isomerase, <i>Streptosporangium roseum</i> /Aconitate hydratase, Aconitase, <i>Gemmatimonadetes</i> bacterium                                                                                                                                                                                                    |
| Sulfi-8 | L(+42.01)KVSW              | NADH-quinone oxidoreductase subunit, <i>Buchnera aphidicola</i> subsp. <i>Baizongia pistaciae</i> strain Bp/Thiol: disulfide interchange protein DsbD, <i>Shewanella sediminis</i> strain HAW-EB3/Thiol: disulfide interchange protein, <i>Arcobacter ebronensis</i> /DNA repair protein, <i>Ashbya gossypii</i> /Aminopeptidase, <i>Teladorsagia circumcincta</i> /NADH-ubiquinone oxidoreductase chain 5, <i>Agarophyton chilensis</i> /Cytochrome P450, <i>Nonomuraea</i> sp. KC333                                                                                                                                                                                                                                                                                                                                                                                                                                                                                                                                                                                         |
| ES-1    | K(+42.01)LATP<br>N         | Ferredoxin-type protein NapG, <i>Helicobacter</i> sp./Proline--tRNA ligase, <i>Pleurocapsa</i> sp. CCALA 161/Sulfite reductase, <i>Methylomonas lenta</i> /Sulfite reductase (NADPH), <i>Methylobacter tundripaludum</i> /Acetylmuramyl aminotransferase, <i>Phenylobacterium hankyongense</i> /50S ribosomal protein L14, <i>Pricia antarctica</i> /UDP-N-acetylglucosamine--N-acetyl-muramyl-(pentapeptide) pyrophosphoryl-undecaprenol N-acetylglucosamine transferase, <i>Flavobacteriaceae</i> bacterium CG02/ATP synthase subunit beta, <i>Alteromonas</i> sp./A Carbamoyl-phosphate synthase large chain, <i>Desulfococcus oleovorans</i>                                                                                                                                                                                                                                                                                                                                                                                                                               |
| ES-2    | LAEGTAL                    | DNA topoisomerase I, <i>Halomonas elongata</i> /DNA mismatch repair protein MutS, <i>Tepidamorphus gemmatus</i> /Glycerol-3-phosphate dehydrogenase (NAD(P)(+)), <i>Marteella</i> sp. AD-3/NifU-like protein, <i>Methylorubrum extorquens</i> /Phosphoribosylaminoimidazole-succinocarboxamide synthase, <i>Hwanghaicola aestuarii</i> /UDP-glucose 6-dehydrogenase, <i>Actinobacteria</i> bacterium 69-20                                                                                                                                                                                                                                                                                                                                                                                                                                                                                                                                                                                                                                                                     |
| ES-3    | PWDKVK                     | Peptidyl-prolyl cis-trans isomerase, <i>Crociniomiacaeae</i> bacterium/Acetyl-coenzyme A carboxylase carboxyl transferase subunit alpha, <i>Clostridium vincentii</i> /Methionine--tRNA ligase, <i>Metallosphaera sedula</i> /Leucine--tRNA ligase, <i>Candidatus Marinimicrobia</i> bacterium/Sulfate adenylyltransferase, <i>Deltaproteobacteria</i> bacterium/NADH dehydrogenase (Ubiquinone) 1 alpha subcomplex 4, <i>Cryptococcus depauperatus</i> CBS 7855                                                                                                                                                                                                                                                                                                                                                                                                                                                                                                                                                                                                               |
| ES-4    | T(+42.01)TYSK<br>EY        | Adenine phosphoribosyltransferase, termite gut metagenome/Methylenetetrahydrofolate reductase, <i>Paenibacillus mucilaginosus</i> K02                                                                                                                                                                                                                                                                                                                                                                                                                                                                                                                                                                                                                                                                                                                                                                                                                                                                                                                                          |
| ES-5    | TGVAQDVQ                   | Sugar ABC transporter permease, <i>Mesorhizobium</i> sp. LSHC420B00                                                                                                                                                                                                                                                                                                                                                                                                                                                                                                                                                                                                                                                                                                                                                                                                                                                                                                                                                                                                            |
| ES-6    | LNSDWK                     | Acetylmuramyl aminotransferase, <i>Pseudomonas</i> sp. HUK17/FAD-binding oxidoreductase, <i>Amycolatopsis alba</i>                                                                                                                                                                                                                                                                                                                                                                                                                                                                                                                                                                                                                                                                                                                                                                                                                                                                                                                                                             |
| Sulfa-1 | AQYEVEAKQ                  | Sugar transporter, <i>Sparassis crispa</i> /SDR family NAD(P)-dependent oxidoreductase, <i>Paenibacillus durus</i> /long-chain-fatty-acid--CoA ligase, <i>Paraburkholderia</i> sp. UYCP14C                                                                                                                                                                                                                                                                                                                                                                                                                                                                                                                                                                                                                                                                                                                                                                                                                                                                                     |
| Sulfa-2 | L(+42.01)SPLK<br>P         | 3-isopropylmalate dehydrogenase, <i>Streptococcus thermophilus</i> /Acetyl-CoA acetyltransferase, <i>Fusobacterium nucleatum</i> subsp. <i>polymorphum</i> /NH(3)-dependent NAD(+) synthetase, <i>Pasillimonas</i> sp. YR330/Dipeptide epimerase, <i>Sphingomonas</i> sp. SRS2/NH(3)-dependent NAD(+) synthetase, <i>Legionella busanensis</i> /Sulfite reductase [NADPH] flavoprotein alpha-component, <i>Serratia symbiotica</i> str. Cinará cedri/DNA helicase, <i>Mycoplasma haemocanis</i> strain Illinois/Cytidylate kinase, <i>Xanthomonadaceae</i> bacterium NML95-0200/Phenylalanine--tRNA ligase beta subunit, <i>Comamonas</i> sp. SCN 65-56/Cytidylate kinase, <i>Streptococcus pyogenes</i> /ABC transporter permease, <i>Anaerotruncus</i> sp. G3/Malic enzyme, <i>Ashbya aceri</i> /DNA helicase, <i>Candidatus Raymondobacteria</i> bacterium RIFOXYD12/Amino acid ABC transporter substrate-binding protein, <i>Shewanella fodinae</i> /Succinate dehydrogenase [ubiquinone] flavoprotein subunit, mitochondrial, <i>Oryzias latipes</i> (Japanese rice fish) |
| Sulfa-3 | QNYKK                      | Orotate phosphoribosyltransferase, <i>Deltaproteobacteria</i> bacterium/Sugar ABC transporter permease, <i>Vagococcus elongatus</i> /Aconitate hydratase, <i>Hydrogenothermus</i> sp.                                                                                                                                                                                                                                                                                                                                                                                                                                                                                                                                                                                                                                                                                                                                                                                                                                                                                          |
| Sulfa-4 | LDSKYGY                    | Peptidylprolyl isomerase, <i>Plasmodium malariae</i> /Sugar ABC transporter permease, <i>Atopobacter</i> sp. AH10                                                                                                                                                                                                                                                                                                                                                                                                                                                                                                                                                                                                                                                                                                                                                                                                                                                                                                                                                              |
| Sulfa-5 | TDYKYY                     | Methionine--tRNA ligase, <i>Epulopiscium</i> sp./Acetyltransf_6 domain-containing protein, <i>Thiothrix lacustris</i>                                                                                                                                                                                                                                                                                                                                                                                                                                                                                                                                                                                                                                                                                                                                                                                                                                                                                                                                                          |
| Sulfa-6 | LVADWK                     | Thiol: disulfide interchange protein, <i>Gammaproteobacteria</i> bacterium/N-acetyltransferase, <i>Pseudomonas frederiksbergensis</i> /FAD_binding_3 domain-containing protein, <i>Archangium</i> sp./Methyltransfer_dom domain-containing protein, <i>Parcubacteria</i> group bacterium                                                                                                                                                                                                                                                                                                                                                                                                                                                                                                                                                                                                                                                                                                                                                                                       |

794

795

796

797

798 **Table 2. Amino acid relative abundance in Sammox-driven prebiotic**

799 **proto-anabolic networks (SPPN). Summary of the average amino acid relative**

800 **abundance (molar ratio) of thiosulfate, sulfite, elemental sulfur, and**

801 **sulfate-fueled SPPN. The associated errors are standard deviations of three**

802 **replicates.**

| Amino acids     | Molar ratio (%)         |                     |                              |                     |              |
|-----------------|-------------------------|---------------------|------------------------------|---------------------|--------------|
|                 | Thiosulfate-fueled SPPN | Sulfite-fueled SPPN | Elemental sulfur-fueled SPPN | Sulfate-fueled SPPN | Average      |
| L-Serine        | 7.04 ± 2.47             | 10.43 ± 1.24        | 17.69 ± 1.60                 | 27.28 ± 1.71        | 15.61 ± 5.5  |
| Glycine         | 15.32 ± 3.73            | 14.99 ± 1.22        | 16.04 ± 2.39                 | 25.96 ± 1.23        | 18.08 ± 3.15 |
| L-Aspartic acid | 6.02 ± 0.79             | 8.12 ± 0.78         | 8.64 ± 0.73                  | 10.12 ± 0.46        | 8.23 ± 0.92  |
| L-Glutamic acid | 19.71 ± 2.81            | 3.20 ± 0.48         | 6.43 ± 0.15                  | 3.96 ± 0.12         | 8.32 ± 4.55  |
| L-Threonine     | 2.35 ± 0.43             | 3.41 ± 0.89         | 5.06 ± 1.60                  | 8.36 ± 0.16         | 4.79 ± 1.53  |
| L-Alanine       | 10.26 ± 1.11            | 13.95 ± 2.78        | 11.89 ± 1.97                 | 17.16 ± 1.61        | 13.32 ± 1.79 |
| L-Proline       | 3.81 ± 0.53             | 5.18 ± 1.13         | 2.26 ± 0.15                  | 5.28 ± 0.33         | 4.13 ± 0.88  |
| L-Ornithine     | 10.56 ± 1.76            | 12.86 ± 2.76        | 11.22 ± 0.50                 | 14.08 ± 0.44        | 12.18 ± 1.03 |
| L-Cysteine      | 3.77 ± 0.53             | 4.78 ± 1.52         | 2.94 ± 0.13                  | 7.04 ± 0.32         | 4.63 ± 1.02  |
| L-Lysine        | 7.61 ± 0.13             | 6.64 ± 1.86         | 5.35 ± 0.97                  | 7.92 ± 0.28         | 6.88 ± 0.71  |
| L-Tyrosine      | 4.14 ± 0.44             | 5.55 ± 1.24         | 4.42 ± 0.14                  | 10.56 ± 0.45        | 6.17 ± 1.76  |
| L-Valine        | 4.65 ± 0.31             | 4.81 ± 0.99         | 3.89 ± 0.23                  | 6.60 ± 0.22         | 5.35 ± 0.62  |
| L-Leucine       | 4.39 ± 0.61             | 5.08 ± 1.06         | 4.16 ± 0.83                  | 7.01 ± 0.26         | 5.16 ± 0.74  |

803
